# Supplementary material for: Treatment outcomes for eating disorders in Sweden: data from the national quality registry
Source: PubMed Central journal article supplement — BMJ Open. 2019 Jan 15;9(1):e024179. doi: 10.1136/bmjopen-2018-024179 (PMC6340438; doi:10.1136/bmjopen-2018-024179), 2019-01-15
Supplement: bmjopen-2018-024179.draft_revisions.pdf [file bmjopen-2018-024179.draft_revisions.pdf]

# BMJ Open

BMJ Open is committed to open peer review. As part of this commitment we make the peer review history of every article we publish publicly available.

When an article is published we post the peer reviewers' comments and the authors' responses online. We also post the versions of the paper that were used during peer review. These are the versions that the peer review comments apply to.

The versions of the paper that follow are the versions that were submitted during the peer review process. They are not the versions of record or the final published versions. They should not be cited or distributed as the published version of this manuscript.

BMJ Open is an open access journal and the full, final, typeset and author-corrected version of record of the manuscript is available on our site with no access controls, subscription charges or pay-per-view fees (<http://bmjopen.bmj.com>).

If you have any questions on BMJ Open's open peer review process please email [info.bmjopen@bmj.com](mailto:info.bmjopen@bmj.com)

# BMJ Open

## Treatment Outcomes for Eating Disorders in Sweden, 2012-2016 "Data from the National Quality Registry"

|                               |                                                                                                                                                                                                      |
|-------------------------------|------------------------------------------------------------------------------------------------------------------------------------------------------------------------------------------------------|
| Journal:                      | <i>BMJ Open</i>                                                                                                                                                                                      |
| Manuscript ID                 | bmjopen-2018-024179                                                                                                                                                                                  |
| Article Type:                 | Research                                                                                                                                                                                             |
| Date Submitted by the Author: | 14-May-2018                                                                                                                                                                                          |
| Complete List of Authors:     | Södersten, Per; Karolinska Institutet<br>Brodin, Ulf; Karolinska Institutet,<br>Sjöberg, Jennie; Mandometer Clinic<br>Zandian, Modjtaba; Karolinska Institutet<br>Bergh, Cecilia; Mandometer Clinic, |
| Keywords:                     | Health policy < HEALTH SERVICES ADMINISTRATION & MANAGEMENT, PUBLIC HEALTH, STATISTICS & RESEARCH METHODS                                                                                            |
|                               |                                                                                                                                                                                                      |

SCHOLARONE™  
Manuscripts

## Treatment Outcomes for Eating Disorders in Sweden, 2012-2016

### “Data from the National Quality Registry”

Per Södersten, Ulf Brodin, Jennie Sjöberg, Modjtaba Zandian, Cecilia Bergh

Department of Neurobiology, Care Sciences and Society, Karolinska Institutet, Mandometer  
Clinic, Novum, S-141 04 Huddinge, Sweden

Per Södersten professor em. Email: [per.sodersten@ki.se](mailto:per.sodersten@ki.se)

Ulf Brodin PhD medical statistician em. Email: [ulf.brodin@ki.se](mailto:ulf.brodin@ki.se)

Jennie Sjöberg RN clinical director. Email: [jennie.sjoberg@mando.se](mailto:jennie.sjoberg@mando.se)

Modjtaba Zandian PhD quality controller. Email: [modjtaba.zandin@ki.se](mailto:modjtaba.zandin@ki.se)

Cecilia Bergh PhD clinical director. Email: [cecilia.bergh@mando.se](mailto:cecilia.bergh@mando.se)

3024 words (abstract, strengths and limitations, references, acknowledgements, and figure legends excluded)

35 references

5 figures

1 table

Correspondence to: Per Södersten [per.sodersten@ki.se](mailto:per.sodersten@ki.se)

## Abstract

**Objective** To report the outcomes of eating disorders treatment in Sweden in 2012-2016.

**Design** The number of patients treated and the number of patients in remission at one year of follow-up at each clinic listed in the National Quality Registry for Eating Disorders Treatment were analyzed and compared with the published outcomes at three clinics that used survival analysis to estimate outcomes.

**Setting** All eating disorders clinics in Sweden.

**Participants** All patients treated at eating disorders clinics in Sweden.

**Intervention** Standard of care for eating disorders at most clinics and normalization of eating behaviour at three clinics.

**Outcome measure** Proportion of patients in remission at follow-up.

**Results** About 2600 patients were treated annually, fewer than half were followed-up, and the rate of remission was about 21% until 2014, decreasing to 14% in 2016. Outcomes differed amongst clinics and within clinics over time. There is no data on relapse in the registry. Rates of remission have been overestimated by excluding more than 50% of patients lost to follow-up. The published rate of remission at three clinics that treated 1200 patients in 1993-2011 was 27, 28, and 40% at one year of follow-up and 39, 68, and 82% when treatment was continued. The relapse rate was about 10% over five years of follow-up for these clinics.

**Conclusions** With the majority of patients lost to follow-up and no data on relapse in the National Quality Registry, it is difficult to estimate of the effects of the treatment of eating disorders in Sweden. Analysis of time to clinically significant events, including an extended

1  
2  
3  
4  
5  
6  
7  
8  
9  
10  
11  
12  
13  
14  
15  
16  
17  
18  
19  
20  
21  
22  
23  
24  
25  
26  
27  
28  
29  
30  
31  
32  
33  
34  
35  
36  
37  
38  
39  
40  
41  
42  
43  
44  
45  
46  
47  
48  
49  
50  
51  
52  
53  
54  
55  
56  
57  
58  
59  
60

period of follow-up, improves the quality of the estimates. Rates of remission have been publically overestimated, misleading health care policies. This is not a national problem as the effect of eating disorders treatment has been similarly overestimated internationally.

For peer review only

### Strengths and limitations of this study

- This study has the strength of analyzing all patients treated, followed-up, and treated to remission at all eating disorders clinics over five years in Sweden.
- These outcomes are available in the National Quality Registry for Eating Disorders Treatment but have not been published in the scientific literature.
- Three clinics have published outcomes at three months intervals making comparisons between the outcomes in the registry possible.
- The study has the strength of showing that a time-to-event analysis improves compliance, thus facilitating estimation of outcomes.
- It is a limitation that whereas outcomes in the registry covered the years 2012-2016, the published outcomes covered the years 1993-2011.

## Introduction

The National Quality Registries in Sweden have been developed starting in the 1970s and today there are about 100 registries, covering virtually all kinds of disease (1). The Swedish Association of Local Authorities and Regions (SALAR) and the Swedish Government recently agreed to strengthen the registries financially, pointing to their key role in the development of all aspects of health care, improving the quality of care, facilitating research, including international comparisons of outcomes, guiding health care policies, and making it possible for anyone to compare the outcomes of treatment at individual clinics (1,2). Indeed, the SALAR has a website for such comparisons (3).

The Swedish National Quality Registry for Eating Disorders Treatment, Riksät, was established in 1999 and has published 11 reports, written in Swedish, in 2001-2016 (4). Following the aims of the registries, the objective of Riksät is to “document the outcome of treatment” (quote from the first report in 2001). Thus, the important measures are the number of patients treated and the number of patients in remission at follow-up. These numbers are listed in Riksät but have not been analyzed and reported in the scientific literature. The first aim of the present study is to examine the rate of remission at the eating disorders clinics in Sweden. The second aim is to compare these remission rates with those that have been published separately by three Swedish clinics (5). The information in Riksät has been publicized nationally as demonstrating increasing rates of remission over the years to 56% in 2015 and that “70% of the patients are ‘cured’ within one year” (4,6). Because these outcomes are better than the outcomes reported in the scientific literature (7,8), it is important to examine their evidence basis. The third aim is to call attention to the fact that there are similar discrepancies between the published and internationally publicized outcomes of eating disorders treatment.

## Methods

Riksät lists the number of patients treated each year and the number of patients in remission at follow-up one year after the start of treatment. Patients in remission from an eating disorder may fulfill the criteria for some other diagnosis. Riksät also reports changes in the patients' social functioning and their experiences of the treatment. These secondary measures improve as patients go into remission and will not be considered in this analysis. Hence, the protocol of Riksät includes two time points for assessment, there is no information on relapse.

Initially, Riksät reported the combined outcomes at the clinics across regions in Sweden, the reports published in 2009 and 2010 were incomplete, and no report was published in 2011. However, the outcomes at individual clinics were reported in 2012-2016. The number of patients treated at each clinic and the proportion of patients who were followed-up are listed in one set of tables in these reports. The number and the proportion of patients in remission at follow-up are listed in another set of tables. These numbers have been combined into one table (supplementary table) and used in the analysis.

### Combined outcomes at all clinics

The numbers of patients treated and followed-up have been summarized for all clinics. The number of patients in remission has been related to the number of patients treated as well as to the number of patients followed-up in an attempt to explain the high remission rates publicized in Sweden.

### Outcomes at individual clinics

In Riksät, the number of patients treated and the number of patients in remission were analyzed for clinics that had followed-up at least 20 patients in 2012-2013 and for clinics that



1  
2  
3 had followed-up at least 10 patients in 2014-2016. Clinics that had followed-up fewer patients  
4  
5 were combined to a category of “other clinics”. These data (supplementary table) have been  
6  
7 analyzed to compare outcomes between clinics.  
8  
9

10  
11 If the treatment and the follow-up assessments are about the same at all clinics, the  
12  
13 probability for remission should be the same in all clinics. This hypothesis, which can be  
14  
15 formalized as:  $H_0: P_i(\text{Remission}) = P_0(\text{Remission})$  for all clinics,  $i=1, 2, 3, \dots, n$ , was tested  
16  
17 using a test for homogeneity of the data (9).  
18  
19

20  
21 Outcomes were compared amongst the three clinics in the Stockholm County Council,  
22  
23 the Stockholm Centre for Eating Disorders (SCÄ), the Capio Centre for Eating Disorders  
24  
25 (Capio), and the Mandometer Clinic (Mando). Each of these clinics had treated more patients  
26  
27 to remission than any other clinic. The major difference in treatments amongst these clinics is  
28  
29 that whilst Mando concentrates on normalizing the patients’ eating behaviour, SCÄ and Capio  
30  
31 use standards of care, including cognitive behavioural therapy (CBT).  
32  
33

### 34 **Published outcomes at three clinics**

35  
36  
37 Mando reported the outcomes every third month of 1428 patients treated at six clinics in four  
38  
39 countries over various periods of time in 1993-2011, and these data are available in the  
40  
41 supplementary files of (5). Three of the clinics, located in Sweden, in Alingsås, Danderyd,  
42  
43 and Huddinge, treated 1200 of these patients. The clinic in Huddinge, within the Stockholm  
44  
45 County Council, is the oldest clinic and is referred to as Mando in this analysis. The  
46  
47 probability of going into remission over consecutive three-month intervals up to 12 months at  
48  
49 these clinics was estimated using a life-table approach to survival analysis (10). The rate of  
50  
51 failure amongst censored patients was estimated to be 20%, yielding a conservative estimate  
52  
53 of treatment outcomes.  
54  
55  
56  
57  
58  
59  
60

1  
2  
3           Whereas the probability of going into remission is an estimate of outcome, the  
4  
5 proportion of patients in remission is the subsequently observed rate of remission. This  
6  
7 analysis uses “the proportion of patients in remission” and “the rate of remission” expressed  
8  
9 as percentage interchangeably (with no decimal points). The number of patients treated is  
10  
11 related to the assessments after one year.  
12

## 13 14 **Results**

### 15 16 **Combined outcomes at all clinics**

17  
18  
19  
20  
21 Figure 1 shows that the total number of patients treated at all clinics increased to about 2600  
22  
23 in 2013, and remained relatively stable over the following years. The figure also shows that  
24  
25 fewer than half the patients were typically followed-up and that the rate of remission was  
26  
27 about 21% in 2012-2014, and decreased to 14% in 2016. The number of patients treated to  
28  
29 remission increased from 477 in 2012 to 589 in 2014 and decreased to 358 in 2016.  
30  
31

32  
33           --- Please insert Figure 1 about here ---  
34  
35

36  
37           Figure 2 shows firstly, that the rate of remission at all clinics that followed-up their  
38  
39 patients was less than 50% in 2012-2014, 29% in 2015, and 36% in 2016. Secondly, the  
40  
41 figure shows that the rate of remission at clinics that had treated at least one patient to  
42  
43 remission increased to 56% in 2015 and decreased to 54% in 2016. The second analysis thus  
44  
45 excluded patients followed-up at clinics that did not treat a single patient to remission. The  
46  
47 significance of these two calculations of remission rates is clarified in the Discussion.  
48  
49

50  
51           --- Please insert Figure 2 about here ---  
52  
53  
54  
55  
56  
57  
58  
59  
60

### Outcomes at individual clinics

Because Riksät reported results for clinics that had followed-up at least 20 patients in 2012-2013 and for all clinics in 2014-2016, the number of clinics reporting their outcomes was lower in 2012-2013 (21 and 23) than in 2014-2016 (70, 64, and 59). However, it is possible to compare how many clinics had treated, followed-up, and treated at least 20 patients to remission in 2012-2016.

Figure 3 shows that more clinics had treated at least 20 patients in 2016 than in 2012. Whereas the clinics that had treated at least 20 patients in 2012 were selected for having followed them up, only 45% of the clinics followed-up at least 20 patients in 2016. About one in three of the clinics had treated at least 20 patients to remission in 2012 compared to about one in eight in 2016. The results in the other years fall in between the results in 2012 and 2016.

--- Please insert Figure 3 about here ---

Out of the 33 clinics that had treated at least 20 patients in 2016 (Figure 3, green bar at the very left), three (9%) had not followed-up any patients, and 21 (64%) had not treated a single patient to remission. These 21 clinics had treated a total of 857 patients, with a median (range) of 32 (20-98) patients/clinic.

SCÄ had treated about four times more patients annually (median: 715; range: 696-724) than Capio (175; 157-178) and Mando (123; 81-168), and followed-up about the same proportion of patients (43; 32-69%) as Capio (50; 48-65%) and Mando (43; 32-83%). These proportions are similar to the average proportions of follow-up at all clinics over these years (Figure 1).

1  
2  
3 Figure 4 shows that Mando had treated a bigger proportion of patients to remission than  
4 SCÄ and Capio in 2014-2016. Whilst the rate of remission was relatively stable at on average  
5 36% at Mando over these three years, it decreased from 29% to 16% at SCÄ and from 30% to  
6 14% at Capio. In 2016, the proportion of patients treated to remission at Mando (35%) was  
7 about twice as big as the corresponding proportion at SCÄ (16%) and Capio (14%).  
8  
9  
10  
11  
12

13  
14 --- Please insert Figure 4 about here ---  
15  
16

### 17 **Test of homogeneity of outcomes between and within clinics**

18  
19 The probability of going into remission in 2012 was significantly different amongst the 17  
20 clinics that had treated patients in all recorded years ( $P \ll 0.001$ ;  $\text{Chi}^2=80.2$ ,  $\text{df}=16$ ). The  
21 probability of going into remission was also significantly different amongst the five clinics  
22 that had treated at least 100 patients in 2012 ( $P < 0.001$ ;  $\text{Chi}^2=23.7$ ,  $\text{df}=4$ ). Analysis of the other  
23 years gives similar results.  
24  
25  
26  
27  
28  
29  
30

31  
32  
33 Analysis of the results at SCÄ showed that the probability of going into remission was  
34 significantly different over the years ( $P \ll 0.001$ ;  $\text{Chi}^2=46.3$ ,  $\text{df}=4$ ). Analysis of the other  
35 clinics gives similar results.  
36  
37  
38  
39

### 40 **Outcomes at “other clinics”**

41  
42  
43 Figure 5 shows that amongst the 2600 patients who were treated annually, the number of  
44 patients treated at the “other clinics” increased to more than 1000 in the last two years. In  
45 parallel, the proportion of patients who were followed-up and treated to remission at these  
46 clinics decreased. Fewer than one in ten of the patients were treated to remission in the final  
47 three years.  
48  
49  
50  
51  
52  
53

54  
55 --- Please insert Figure 5 about here ---  
56  
57

### **Published outcomes at three clinics**

Table 1 shows that the proportion of patients in remission at 12 months assessments was at least 27% and significantly different at the three Mando clinics, whose outcomes are published. Treatment continues after the 12 months at these clinics and the proportion of patients in remission increases after various, prolonged periods of time. Note that these clinics had been operating over various periods of time.

--- Please insert Table 1 about here ---

### **Discussion**

About 2600 patients were treated annually at the eating disorders clinics in Sweden in 2012-2016, fewer than half were followed-up, and the proportion of patients treated to remission decreased from one in five in 2012 to less than one in seven in 2016. However, remission rates which are more than three times higher have been publicized nationally. These estimates were derived by excluding patients lost to follow-up and patients followed-up at clinics that did not treat patients to remission. In 2016, only four clinics treated 20 patients to remission, most clinics treated a small number of patients, followed-up a few, and treated only one patient in ten to remission. Outcomes varied significantly between clinics each year and within clinics over years. In addition, in 2016 more than half the 33 clinics that had treated on average 32 patients had failed to treat a single patient to remission; one of these clinics had treated 98 patients unsuccessfully.

### **Interpretation and comparison with published outcomes**

Whilst these findings indicate that the procedures of treatment and follow-up differ amongst clinics in Sweden, a word of caution seems appropriate. For example, although outcomes

1  
2  
3 were significantly different over years at the biggest clinic (SCÄ), patients were treated to  
4 remission all years, suggesting that a statistically significant within-clinic variation may be  
5 less significant clinically. However, it seems unlikely that the decrease from a rate of  
6 remission of about 30% in 2014 at this clinic to about half that rate two years later is a matter  
7 of random variation. And the similar decrease in the rate of remission at another clinic in  
8 these years (Capio) suggests that the procedures at these clinics also had deteriorated, at least  
9 temporarily.  
10  
11  
12  
13  
14  
15  
16  
17  
18

19 Possible reasons for the variation in outcomes include changes in staffing, training of  
20 staff, patient compliance to treatment, and the physical conditions in the clinics, factors that  
21 affect outcomes in multicenter clinical trials (11). While the “study protocol” of the  
22 multicenter trial aims at reducing the influence of these factors, there is no standard protocol  
23 for the treatment of eating disorders. And although there is agreement that the treatment  
24 guidelines for eating disorders should be followed, this consensus view has not yet improved  
25 outcomes (12–18). For example, an attempt at implementing CBT, which is recommended in  
26 all guidelines, in combination with antidepressant medication for the treatment of bulimia in  
27 primary care in the U.S. resulted in a 70% dropout rate (19). A similar effort in general  
28 practice in the U.K. found that out of 683 patients with a diagnosis of bulimia, about half of  
29 the 272 patients who entered CBT completed the treatment, and although those patients  
30 improved, they were not free of eating disorder symptoms after treatment (20). Compliance to  
31 eating disorders treatment is a general problem, not a “Swedish” problem.  
32  
33  
34  
35  
36  
37  
38  
39  
40  
41  
42  
43  
44  
45  
46  
47

48 The treatment at Mando was developed starting in 1993. A randomized controlled trial  
49 demonstrated its effectiveness (21) and outcomes were subsequently reported for 1428  
50 patients treated at six clinics in four countries (5). The combined rate of remission at these  
51 clinics was about 75% in on average one year of treatment and the rate of relapse was about  
52  
53  
54  
55  
56  
57  
58  
59  
60

1  
2  
3 10% over five years of follow-up (5). Similar to Riksät, estimates were done amongst all  
4  
5 patients entering treatment. However, far more patients were lost to follow-up at Riksät's one  
6  
7 year time point of follow-up than to Mando's procedure of monitoring patients at three-  
8  
9 months intervals throughout treatment and at 1, 2, 3, 6, 9, 12, 18, 24, 36, 48, and 60 months of  
10  
11 follow-up (5). Despite the difference, the rate of remission at the Mando clinic in the  
12  
13 Stockholm County Council was on average 33% in 2012-2016 according to the Riksät  
14  
15 calculation, which is about half the estimated published 75% rate of remission after on  
16  
17 average one year of treatment (5).  
18  
19  
20

21 Average remission rates should be viewed cautiously as outcomes at varied between  
22  
23 clinics. Thus, the rate of remission at 12 months differed significantly at the three Mando  
24  
25 clinics, yet it was higher than the average values reported for all clinics in each of the five  
26  
27 years in Riksät. Differences in treatment methods between the Mando clinics and the other  
28  
29 clinics may explain the differences in outcomes (8) and it is possible that outcomes will be  
30  
31 more consistent at the Mando clinics once they have been operating for a longer period of  
32  
33 time. For example, the Alingsås clinic had been treating patients for only two years and  
34  
35 reached a rate of remission of only 39%. The variation in the rate for remission at 12 months  
36  
37 at the Mando clinics in Amsterdam (16%), San Diego (52%), and Melbourne (25%) (5),  
38  
39 support previous findings that international cultural and medical system differences also  
40  
41 affect treatment outcomes (22). Thus, patients treated in San Diego improved rapidly, but they  
42  
43 were often prevented from continuing in treatment because of the financial constraints of their  
44  
45 insurance policies (5), a problem that would not affect patients in Sweden. It should be noted,  
46  
47 however, that relatively few patients had been treated at these clinics.  
48  
49  
50

51  
52 Dropout and relapse are significant events in the treatment of eating disorders (8,23),  
53  
54 and neither these events, nor remission, should be expected to occur after a predetermined  
55  
56  
57  
58  
59  
60

1  
2  
3 period of time such as at one year of follow-up as used in Riksät. It seems likely that this  
4  
5 procedure explains why more than half the patients were lost to follow-up in Riksät. Practical  
6  
7 approaches to survival analysis, including time-to-event analysis, are long available (10,24)  
8  
9 and should be used in studies of outcomes of eating disorders treatment. The higher level of  
10  
11 compliance at the Mando clinics (5) offers support for their value.  
12  
13

14  
15       Considering the difference between outcomes at Mando and the other Swedish clinics,  
16  
17 including the fact that several hundred patients have been treated to remission, and that the  
18  
19 rate of relapse has been reduced to 10% at the Mando clinics (5), a randomized controlled trial  
20  
21 comparing outcomes at these clinics may be redundant; an attempt at a comparison (25), was  
22  
23 fraught with problems (5). However, although the published literature indicates that  
24  
25 differences in the characteristics of patients at admission do not explain the differences in  
26  
27 remission rates (26), the possibility that such differences exist should be examined.  
28  
29

30  
31       The finding that the effects of eating disorders treatment have been overestimated in  
32  
33 Sweden is similar to the international claim that CBT is “efficacious for a range of eating  
34  
35 disorder presentations in the short and long-term” (18), publicized as: “Based on a solid  
36  
37 empirical foundation, the transdiagnostic enhanced CBT approach will immediately become  
38  
39 the gold standard for the treatment of eating disorders” (27), and “[the effect of CBT] is the  
40  
41 most dramatic that we have seen in the literature ... [including] the potency ... and the  
42  
43 impressive maintenance of change over the 19-months follow-up” (28). The published  
44  
45 evidence does not support these claims (8,29–31) and evidence that the outcomes of CBT  
46  
47 have been overestimated for the treatment of other disorders is gradually emerging (32,33).  
48  
49  
50  
51  
52  
53  
54  
55  
56  
57  
58  
59  
60



### Implications for policy makers

Overestimations of the outcomes of the treatment for eating disorders in Sweden have been publicized over several years (4), including the claim that “70% of the patients are ‘cured’ within one year”, which is maintained on Sweden’s National Educational Radio Channel (6). These overstatements have misinformed health policy makers and can now be corrected.

In order to guide decisions on matters of health care, National and International Quality Registries must offer reliable information. Widely publicized “facts” need to be critically examined. Policy makers should be aware that once ill advised policies have been established, retrospectively controlling their evidence basis can be ineffective, and even strengthen the misguided policy (34,35).

### Acknowledgements

We thank Sara Norring, Riksät, Anna Sandelin, the Centre of Registries Västra Götaland, and Fredrik Westander and Lale Björne-Fergéus, SALAR, for information on Riksät.

**Transparency declaration:** Södersten affirms that the manuscript is an honest, accurate, and transparent account of the study being reported; that no important aspects of the study have been omitted; and that any discrepancies from the study as planned (and, if relevant, registered) have been explained.

**Ethics committee approval:** The project was approved by the Regional Ethical Review Board of Stockholm (Dnr 2015/456-31).

**Funding:** This work was supported by The County Council of Stockholm grant number HNSV 15896, HSN 1502-0291, project 3252.

**Role of the sponsor:** The sponsor had no influence on the work.

1  
2  
3 **Data sharing statement:** The data used for this analysis are available in a supplementary  
4  
5 table.  
6  
7  
8  
9  
10  
11  
12  
13  
14  
15  
16  
17  
18  
19  
20  
21  
22  
23  
24  
25  
26  
27  
28  
29  
30  
31  
32  
33  
34  
35  
36  
37  
38  
39  
40  
41  
42  
43  
44  
45  
46  
47  
48  
49  
50  
51  
52  
53  
54  
55  
56  
57  
58  
59  
60

For peer review only

## References

1. Swedish Association of Local Authorities and Regions. Swedish National Quality Registries [Internet]. [cited 2018 May 7]. Available from: <http://kvalitetsregister.se/englishpages.2040.html>
2. Government Offices of Sweden. Överenskommelse om stöd till nationella kvalitetsregister under 2018 [Internet]. [cited 2018 May 7]. Available from: <http://www.regeringen.se/overenskommelser-och-avtal/2017/12/nationella-kvalitetsregister/>
3. Swedish Association of Local Authorities and Regions. Vården i Siffror [Internet]. [cited 2018 May 7]. Available from: <https://vardenisiffror.se/>
4. Birgegård A, Norring C, Norring S. National Quality Register for Eating Disorders Treatment [Internet]. [cited 2018 May 7]. Available from: <https://riksat.registercentrum.se/>
5. Bergh C, Callmar M, Danemar S, Hölcke M, Isberg S, Leon M, et al. Effective treatment of eating disorders: Results at multiple sites. *Behav Neurosci*. 2013 Dec;127(6):878–89.
6. von Hausswolff-Juhlin Y. Från evidens till praktiska råd [Internet]. [cited 2018 May 7]. Available from: <https://urplay.se/program/203090-ur-samtiden-ny-kunskap-om-atstorningar-fran-evidens-till-praktiska-rad>
7. Linardon J, Wade TD, de la Piedad Garcia X, Brennan L. The efficacy of cognitive-behavioral therapy for eating disorders: A systematic review and meta-analysis. *J Consult Clin Psychol*. 2017 Nov;85(11):1080–94.
8. Södersten P, Bergh C, Leon M, Brodin U, Zandian M. Cognitive behavior therapy for eating disorders versus normalization of eating behavior. *Physiol Behav*. 2017 Mar 16;174:178–90.
9. Kirkwood BR, Sterne JAC. *Essential Medical Statistics*. Blackwell, Oxford; 2003.
10. Tableman M, Kim JS. *Survival Analysis Using S: Analysis of Time-to-Event Data*. Boca Raton, FL: Chapman & Hall/CRC; 2004.
11. Guthrie LB, Oken E, Sterne JA, Gillman MW, Patel R, Vilchuck K, et al. Ongoing monitoring of data clustering in multicenter studies. *BMC Med Res Methodol*. 2012 Mar 13;12:29.
12. af Sandeberg A-M, Birgegård A, Mohlin L, Nordlander Ström C, Norring C, Siverstrand M-L. Regionalt vårdprogram – ätstörningar. [Internet]. [cited 2018 May 7]. Available from: [http://www1.psykiatristod.se/Global/vardprogram\\_fulltext/RV\\_Atstorningar\\_2009\\_updat\\_2010.pdf](http://www1.psykiatristod.se/Global/vardprogram_fulltext/RV_Atstorningar_2009_updat_2010.pdf)
13. Hay PP, Bacaltchuk J, Stefano S, Kashyap P. Psychological treatments for bulimia nervosa and bingeing. *Cochrane Database Syst Rev*. 2009 Oct 7;(4):CD000562.

14. Allen S, Dalton WT. Treatment of eating disorders in primary care: a systematic review. *J Health Psychol*. 2011 Nov;16(8):1165–76.
15. Hay P, Chinn D, Forbes D, Madden S, Newton R, Sugenor L, et al. Royal Australian and New Zealand College of Psychiatrists clinical practice guidelines for the treatment of eating disorders. *Aust N Z J Psychiatry*. 2014 Nov 1;48(11):977–1008.
16. Zipfel S, Giel KE, Bulik CM, Hay P, Schmidt U. Anorexia nervosa: aetiology, assessment, and treatment. *Lancet Psychiatry*. 2015 Dec;2(12):1099–111.
17. Le Grange D, Hughes EK, Court A, Yeo M, Crosby RD, Sawyer SM. Randomized clinical trial of parent-focused treatment and family-based treatment for adolescent anorexia nervosa. *J Am Acad Child Adolesc Psychiatry*. 2016 Aug;55(8):683–92.
18. Linardon J, Fairburn CG, Fitzsimmons-Craft EE, Wilfley DE, Brennan L. The empirical status of the third-wave behaviour therapies for the treatment of eating disorders: A systematic review. *Clin Psychol Rev*. 2017 Dec;58:125–40.
19. Walsh BT, Fairburn CG, Mickley D, Sysko R, Parides MK. Treatment of bulimia nervosa in a primary care setting. *Am J Psychiatry*. 2004 Mar;161(3):556–61.
20. Knott S, Woodward D, Hoefkens A, Limbert C. Cognitive behaviour therapy for bulimia nervosa and eating disorders not otherwise specified: Translation from randomized controlled trial to a clinical setting. *Behav Cogn Psychother*. 2015 Nov;43(6):641–54.
21. Bergh C, Brodin U, Lindberg G, Södersten P. Randomized controlled trial of a treatment for anorexia and bulimia nervosa. *Proc Natl Acad Sci*. 2002 Jul 9;99(14):9486–91.
22. Wright JG, Katz JN, Losina E. Clinical trials in orthopaedics research. Part I. Cultural and practical barriers to randomized trials in orthopaedics. *J Bone Joint Surg Am* [Internet]. 2011 Mar 2 [cited 2018 May 7];93(5). Available from: <https://www.ncbi.nlm.nih.gov/pmc/articles/PMC3043780/>
23. Linardon J, Hindle A, Brennan L. Dropout from cognitive-behavioral therapy for eating disorders: A meta-analysis of randomized, controlled trials. *Int J Eat Disord*. 2018 Mar 1;
24. Pocock SJ. *Clinical Trials: A Practical Approach*. First. Chichester West Sussex ; New York: Wiley; 1984. 278 p.
25. van Elburg AA, Hillebrand JJG, Huyser C, Snoek M, Kas MJH, Hoek HW, et al. Mandometer treatment not superior to treatment as usual for anorexia nervosa. *Int J Eat Disord*. 2012 Mar 1;45(2):193–201.
26. Södersten P, Bergh C, Leon M, Zandian M. Dopamine and anorexia nervosa. *Neurosci Biobehav Rev*. 2016 Jan;60:26–30.
27. Fairburn CG. *Cognitive Behavior Therapy and Eating Disorders*. New York: The Guilford Press; 2008.
28. Hollon SD, Wilson GT. Psychoanalysis or cognitive-behavioral therapy for bulimia nervosa: the specificity of psychological treatments. *Am J Psychiatry*. 2014 Jan;171(1):13–6.

- 1  
2  
3 29. Lampard AM, Sharbanee JM. The Cognitive-Behavioural Theory and Treatment of  
4 Bulimia Nervosa: An Examination of Treatment Mechanisms and Future Directions. *Aust*  
5 *Psychol*. 2015 Feb 1;50(1):6–13.  
6  
7 30. Troscianko ET. CBT for eating disorders: A not-yet-success story [Internet]. [cited 2018  
8 May 8]. Available from: <https://www.psychologytoday.com/us/experts/emily-troscianko>  
9  
10 31. Gutiérrez E, Carrera O. Anorexia nervosa treatments and Occam’s razor. *Psychol Med*.  
11 2018 Jan 25;1–2.  
12  
13 32. Christensen H, Mackinnon AJ. Review: computerised CBT improves adult depression in  
14 the short-term, but its effect may have been overestimated previously. *Evid Based Ment*  
15 *Health*. 2013 Nov;16(4):119.  
16  
17 33. Steinert C, Munder T, Rabung S, Hoyer J, Leichsenring F. Psychodynamic therapy: As  
18 efficacious as other empirically supported treatments? A meta-analysis testing  
19 equivalence of outcomes. *Am J Psychiatry*. 2017 01;174(10):943–53.  
20  
21 34. Lewandowsky S, Ecker UKH, Seifert CM, Schwarz N, Cook J. Misinformation and its  
22 correction: Continued influence and successful debiasing. *Psychol Sci Public Interest J*  
23 *Am Psychol Soc*. 2012 Dec;13(3):106–31.  
24  
25 35. Fazio LK, Brashier NM, Payne BK, Marsh EJ. Knowledge does not protect against  
26 illusory truth. *J Exp Psychol Gen*. 2015 Oct;144(5):993–1002.  
27  
28  
29  
30  
31  
32  
33  
34  
35  
36  
37  
38  
39  
40  
41  
42  
43  
44  
45  
46  
47  
48  
49  
50  
51  
52  
53  
54  
55  
56  
57  
58  
59  
60

**Figure 1.** Number of patients treated at all clinics in Sweden and proportion of patients followed-up and in remission one year later. The year on the x-axis indicates the year of follow-up, the corresponding number of patients starting their treatment the year before.

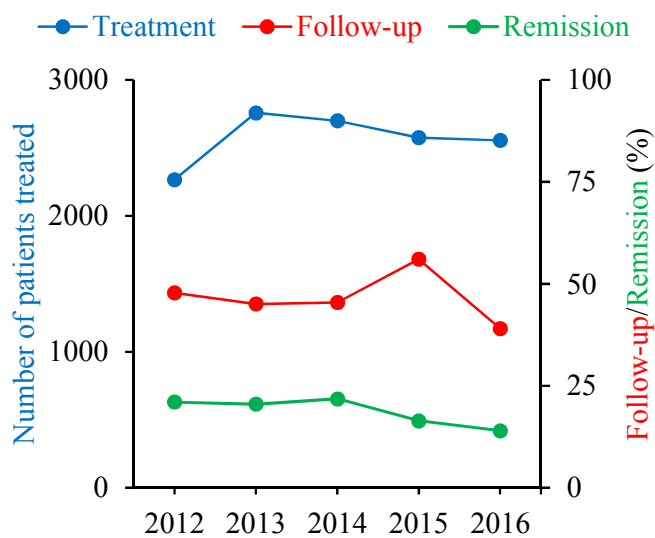

1  
2  
3  
4  
5  
6  
7  
8  
9  
10  
11  
12  
13  
14  
15  
16  
17  
18  
19  
20  
21  
22  
23  
24  
25  
26  
27  
28  
29  
30  
31  
32  
33  
34  
35  
36  
37  
38  
39  
40  
41  
42  
43  
44  
45  
46  
47  
48  
49  
50  
51  
52  
53  
54  
55  
56  
57  
58  
59  
60

**Figure 2.** Proportion of patients in remission at all clinics that followed-up their patients and at clinics that treated at least one patient to remission.

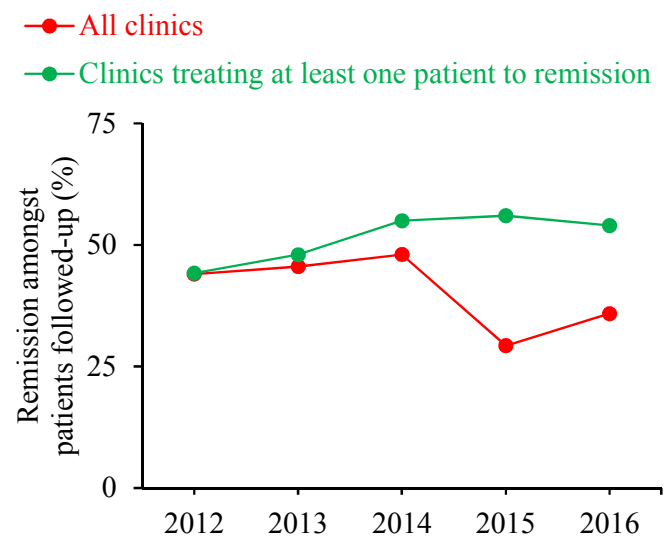

Peer review only

**Figure 3.** Number of clinics that treated, followed-up, and treated at least 20 patients to remission and proportion of clinics that followed-up and treated at least 20 patients to remission in 2012 and 2016.

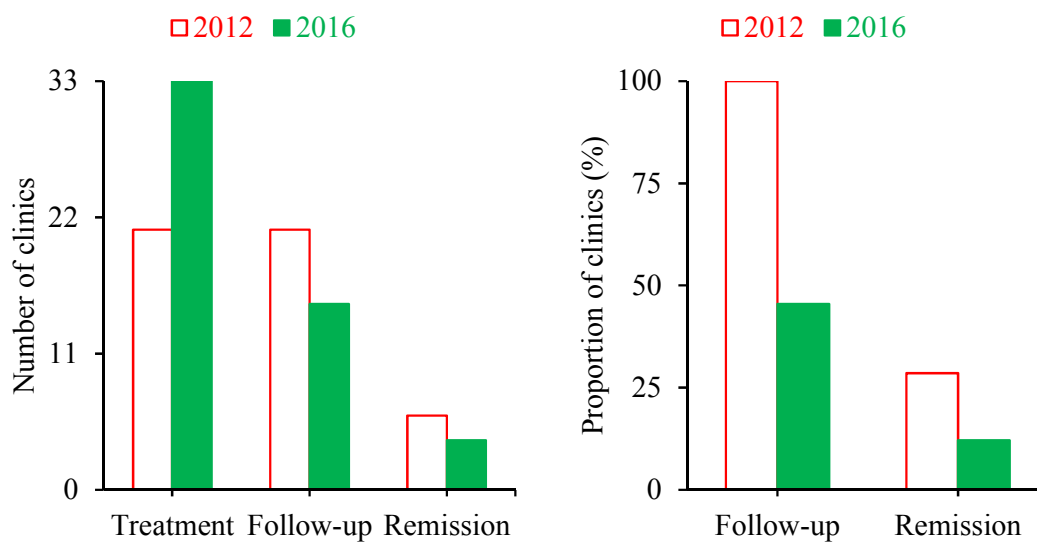



**Figure 4.** Proportion of patients treated to remission at the three clinics that treated more patients to remission than any other clinic.

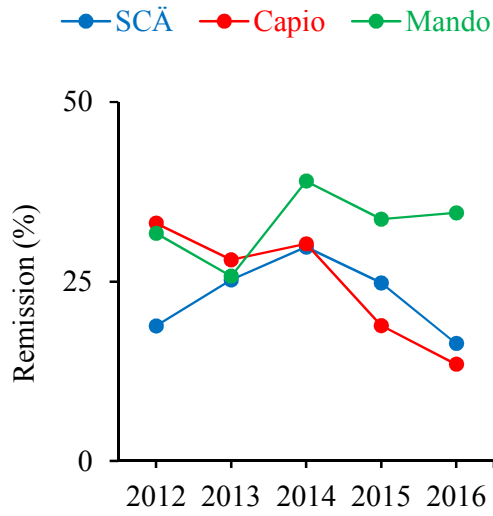

For review only

**Figure 5.** Number of patients treated at clinics that followed-up fewer than 10 patients and proportion of patients followed-up and in remission one year later. The year on the x-axis indicates the year of follow-up, the corresponding number of patients starting their treatment the year before.

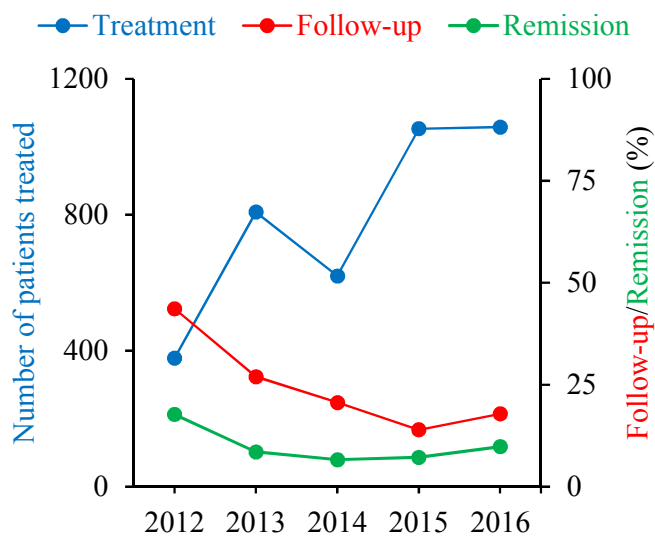

**Table 1.** Proportion of patients in remission at three Mando clinics.

| <u>Outcome</u>                      | <u>Clinic</u>   |                 |                 |
|-------------------------------------|-----------------|-----------------|-----------------|
|                                     | <u>Alingsås</u> | <u>Danderyd</u> | <u>Huddinge</u> |
| Operation (years)                   | 2               | 7               | 18              |
| <u>12 months assessment</u>         |                 |                 |                 |
| Patients in remission               | 13              | 72              | 219             |
| Patients not in remission           | 36              | 107             | 552             |
| Proportion in remission             | 27              | 40*             | 28              |
| <u>Continued treatment (months)</u> |                 |                 |                 |
| Patients in remission               | 19              | 141             | 490             |
| Patients not in remission           | 27              | 27              | 170             |
| <u>Proportion in remission</u>      | <u>39</u>       | <u>82</u>       | <u>68</u>       |

\*P=0.0017 compared to Alingsås and Huddinge after P=0.0069 (overall difference).

**Supplementary table.**

Number of patients treated (Treat), followed-up (F-up), and in remission at follow-up (Rem) at eating disorders clinics in Sweden in 2012-2016. The three clinics in the Stockholm County Council are the Stockholm Centre for Eating Disorders (SCÄ, A01), Capio Centre for Eating Disorders (Capio, A04), and the Mandometer Clinic (Mando (B01). Other is the combination of all clinics that followed-up fewer than 20 patients in 2012-2013 and fewer than 10 patients in 2014-2016. Whilst most of the cells can be filled in, it is not possible to fill in all cells, because of the procedures of follow-up. The clinics are arranged from the maximal-minimal number of patients treated.

| 2012   |       |      |     | 2013   |       |      |       | 2014   |       |      |     |
|--------|-------|------|-----|--------|-------|------|-------|--------|-------|------|-----|
| Clinic | Treat | F-up | Rem | Clinic | Treat | F-up | Rem   | Clinic | Treat | F-up | Rem |
| A01    | 696   | 224  | 131 | A01    | 710   | 305  | 179   | A01    | 705   | 339  | 210 |
| A04    | 157   | 93   | 52  | A04    | 176   | 88   | 49    | A04    | 162   | 77   | 49  |
| B01    | 123   | 53   | 39  | B01    | 168   | 54   | 43    | B01    | 136   | 59   | 53  |
| T01    | 120   | 50   | 21  | T01    | 116   | 39   | 20    | M10    | 105   | 36   | 20  |
| M10    | 107   | 38   | 22  | M10    | 111   | 36   | 22    | T01    | 99    | 46   | 21  |
| U02    | 90    | 23   | 9   | O09    | 89    | 36   | 19    | X02    | 85    | 40   | 22  |
| O09    | 78    | 38   | 16  | E12    | 83    | 41   | 28    | H01    | 82    | 36   | 15  |
| E12    | 66    | 25   | 14  | Å04    | 63    | 35   | 21    | U02    | 78    | 16   | 6   |
| N05    | 49    | 26   | 11  | H01    | 59    | 43   | 18    | E12    | 72    | 38   | 23  |
| R01    | 48    | 33   | 13  | N02    | 58    | 30   | 7     | N07    | 66    | 16   | 3   |
| H01    | 44    | 44   | 12  | O07    | 56    | 35   | 4     | S02    | 63    | 1    | 0   |
| D03    | 40    | 38   | 7   | O03    | 44    | 44   | 6     | O09    | 57    | 27   | 15  |
| K08    | 36    | 24   | 12  | M12    | 42    | 41   | 10    | N02    | 55    | 32   | 15  |
| O03    | 36    | 33   | 8   | N05    | 39    | 26   | 3     | C04    | 52    | 0    | 0   |
| Å04    | 33    | 21   | 7   | N07    | 39    | 21   | 1     | O03    | 52    | 30   | 5   |
| O07    | 31    | 31   | 5   | C03    | 38    | 30   | 13    | W11    | 49    | 11   | 0   |
| W01    | 30    | 28   | 20  | P04    | 33    | 32   | 9     | O07    | 43    | 16   | 2   |
| N02    | 29    | 28   | 1   | W01    | 28    | 28   | 9     | N05    | 40    | 16   | 8   |
| N07    | 29    | 22   | 2   | D03    |       | 12   | 3     | C03    | 39    | 17   | 5   |
| P04    | 26    | 26   | 0   | K08    |       | 13   | 9     | M52    | 39    | 20   | 11  |
| C03    | 21    | 21   | 8   | U02    |       | 12   | 5     | P04    | 37    | 15   | 0   |
| Other  | 378   | 165  | 67  | Z02    |       | 13   | 8     | Å02    | 33    | 27   | 14  |
|        |       |      |     | Å02    |       | 11   | 10    | D03    | 31    | 11   | 0   |
| Sum    | 2267  | 1084 | 477 | Other  | 806   | 218  | 69    | M03    | 30    | 7    | 0   |
|        |       |      |     |        |       |      |       | Å04    | 30    | 19   | 14  |
|        |       |      |     | Sum    | 2758  | 1243 | 565,9 | R01    | 29    | 4    | 0   |
|        |       |      |     |        |       |      |       | Y06    | 29    | 0    | 0   |
|        |       |      |     |        |       |      |       | M12    | 26    | 15   | 7   |
|        |       |      |     |        |       |      |       | W04    | 26    | 8    | 0   |
|        |       |      |     |        |       |      |       | K08    | 25    | 13   | 9   |
|        |       |      |     |        |       |      |       | W01    | 24    | 9    | 0   |
|        |       |      |     |        |       |      |       | B03    | 20    | 4    | 0   |
|        |       |      |     |        |       |      |       | B05    | 19    | 1    | 0   |
|        |       |      |     |        |       |      |       | Z02    | 19    | 10   | 10  |
|        |       |      |     |        |       |      |       | Å12    | 19    | 4    | 0   |
|        |       |      |     |        |       |      |       | D08    | 18    | 10   | 8   |
|        |       |      |     |        |       |      |       | F01    | 17    | 10   | 0   |
|        |       |      |     |        |       |      |       | Y05    | 16    | 3    | 0   |
|        |       |      |     |        |       |      |       | O66    | 15    | 6    | 0   |

|    |  |              |             |             |            |
|----|--|--------------|-------------|-------------|------------|
| 1  |  |              |             |             |            |
| 2  |  | <b>E08</b>   | 13          | 6           | 0          |
| 3  |  | <b>F02</b>   | 13          | 12          | 3          |
| 4  |  | <b>M28</b>   | 13          | 7           | 0          |
| 5  |  | <b>Å06</b>   | 11          | 2           | 0          |
| 6  |  | <b>E09</b>   | 9           | 2           | 0          |
| 7  |  | <b>I05</b>   | 9           | 0           | 0          |
| 8  |  | <b>Y08</b>   | 9           | 1           | 0          |
| 9  |  | <b>D14</b>   | 8           | 0           | 0          |
| 10 |  | <b>Z05</b>   | 8           | 0           | 0          |
| 11 |  | <b>G03</b>   | 7           | 5           | 0          |
| 12 |  | <b>E06</b>   | 6           | 0           | 0          |
| 13 |  | <b>E17</b>   | 6           | 4           | 0          |
| 14 |  | <b>D06</b>   | 5           | 0           | 0          |
| 15 |  | <b>I01</b>   | 5           | 0           | 0          |
| 16 |  | <b>Å11</b>   | 5           | 3           | 0          |
| 17 |  | <b>F04</b>   | 4           | 2           | 0          |
| 18 |  | <b>F10</b>   | 4           | 0           | 0          |
| 19 |  | <b>E11</b>   | 3           | 0           | 0          |
| 20 |  | <b>E25</b>   | 3           | 2           | 0          |
| 21 |  | <b>O46</b>   | 3           | 3           | 0          |
| 22 |  | <b>E22</b>   | 2           | 1           | 0          |
| 23 |  | <b>O01</b>   | 2           | 0           | 0          |
| 24 |  | <b>B10</b>   | 1           | 0           | 0          |
| 25 |  | <b>F07</b>   | 1           | 0           | 0          |
| 26 |  | <b>F08</b>   | 1           | 0           | 0          |
| 27 |  | <b>K09</b>   | 1           | 0           | 0          |
| 28 |  | <b>O67</b>   | 1           | 0           | 0          |
| 29 |  | <b>W13</b>   | 1           | 0           | 0          |
| 30 |  | <b>Y07</b>   | 1           | 0           | 0          |
| 31 |  | <b>Y10</b>   | 1           | 0           | 0          |
| 32 |  | <b>Y11</b>   | 1           | 0           | 0          |
| 33 |  | <b>I01</b>   | 0           | 0           | 0          |
| 34 |  | <b>M37</b>   | 0           | 0           | 0          |
| 35 |  | <b>M57</b>   | 0           | 0           | 0          |
| 36 |  | <b>O27</b>   | 0           | 0           | 0          |
| 37 |  | <b>O31</b>   | 0           | 0           | 0          |
| 38 |  | <b>O35</b>   | 0           | 0           | 0          |
| 39 |  | <b>O36</b>   | 0           | 0           | 0          |
| 40 |  | <b>O37</b>   | 0           | 0           | 0          |
| 41 |  | <b>O50</b>   | 0           | 0           | 0          |
| 42 |  | <b>O72</b>   | 0           | 0           | 0          |
| 43 |  | <b>Other</b> |             | 128         | 41         |
| 44 |  | <b>Sum</b>   | <b>2699</b> | <b>1098</b> | <b>548</b> |
| 45 |  |              |             |             |            |
| 46 |  |              |             |             |            |
| 47 |  |              |             |             |            |
| 48 |  |              |             |             |            |
| 49 |  |              |             |             |            |
| 50 |  |              |             |             |            |
| 51 |  |              |             |             |            |
| 52 |  |              |             |             |            |
| 53 |  |              |             |             |            |
| 54 |  |              |             |             |            |
| 55 |  |              |             |             |            |
| 56 |  |              |             |             |            |
| 57 |  |              |             |             |            |
| 58 |  |              |             |             |            |
| 59 |  |              |             |             |            |
| 60 |  |              |             |             |            |

**2015**

| <b>Clinic</b> | <b>Treat</b> | <b>F-up</b> | <b>Rem</b> |
|---------------|--------------|-------------|------------|
| <b>A01</b>    | 734          | 505         | 182        |
| <b>A04</b>    | 175          | 113         | 33         |
| <b>O09</b>    | 109          | 13          | 0          |
| <b>T01</b>    | 106          | 36          | 0          |
| <b>B01</b>    | 95           | 79          | 32         |
| <b>M10</b>    | 95           | 42          | 15         |
| <b>H01</b>    | 93           | 51          | 4          |
| <b>X02</b>    | 83           | 7           | 0          |
| <b>S02</b>    | 73           | 37          | 0          |
| <b>U02</b>    | 73           | 14          | 0          |
| <b>N07</b>    | 71           | 20          | 0          |
| <b>E12</b>    | 59           | 49          | 20         |
| <b>N02</b>    | 47           | 41          | 6          |
| <b>N05</b>    | 45           | 5           | 0          |
| <b>M52</b>    | 40           | 7           | 3          |
| <b>C04</b>    | 36           | 0           | 0          |
| <b>O07</b>    | 35           | 31          | 3          |
| <b>M03</b>    | 34           | 5           | 0          |
| <b>Å04</b>    | 34           | 14          | 7          |
| <b>D03</b>    | 31           | 18          | 0          |
| <b>M12</b>    | 31           | 9           | 0          |
| <b>O03</b>    | 29           | 21          | 10         |
| <b>C03</b>    | 26           | 13          | 11         |
| <b>Z02</b>    | 26           | 13          | 9          |
| <b>M57</b>    | 25           | 0           | 0          |
| <b>K08</b>    | 23           | 16          | 0          |
| <b>B03</b>    | 22           | 14          | 0          |
| <b>Å02</b>    | 22           | 11          | 0          |
| <b>E08</b>    | 18           | 10          | 0          |
| <b>O27</b>    | 17           | 17          | 7          |
| <b>P04</b>    | 17           | 0           | 0          |
| <b>W01</b>    | 17           | 17          | 5          |
| <b>Y06</b>    | 15           | 7           | 0          |
| <b>D08</b>    | 14           | 2           | 0          |
| <b>G03</b>    | 14           | 6           | 0          |
| <b>I05</b>    | 13           | 0           | 0          |
| <b>O66</b>    | 13           | 13          | 0          |
| <b>R01</b>    | 13           | 6           | 0          |
| <b>Y05</b>    | 13           | 2           | 0          |

**2016**

| <b>Clinic</b> | <b>Treat</b> | <b>F-up</b> | <b>Rem</b> |
|---------------|--------------|-------------|------------|
| A01           | 715          | 298         | 117        |
| A04           | 178          | 95          | 24         |
| T01           | 98           | 20          | 0          |
| O09           | 85           | 40          | 0          |
| X02           | 82           | 49          | 0          |
| B01           | 81           | 43          | 28         |
| O27           | 80           | 52          | 7          |
| H01           | 77           | 23          | 6          |
| M10           | 75           | 17          | 6          |
| E12           | 67           | 35          | 7          |
| C03           | 64           | 30          | 20         |
| N07           | 64           | 1           | 0          |
| U02           | 63           | 0           | 0          |
| C04           | 49           | 0           | 0          |
| O07           | 49           | 28          | 5          |
| W11           | 44           | 2           | 0          |
| N02           | 40           | 13          | 0          |
| M52           | 36           | 34          | 0          |
| N05           | 35           | 26          | 0          |
| O03           | 35           | 24          | 8          |
| S02           | 32           | 7           | 0          |
| W01           | 31           | 29          | 11         |
| Y06           | 31           | 5           | 0          |
| Å04           | 30           | 12          | 10         |
| M03           | 26           | 1           | 0          |
| B03           | 23           | 1           | 0          |
| D03           | 23           | 15          | 0          |
| K08           | 23           | 13          | 0          |
| L01           | 21           | 0           | 0          |
| M37           | 21           | 1           | 0          |
| Z02           | 21           | 6           | 0          |
| E17           | 20           | 12          | 0          |
| Å12           | 20           | 1           | 0          |
| M28           | 19           | 7           | 0          |
| R01           | 19           | 5           | 0          |
| Å02           | 19           | 5           | 0          |
| W04           | 17           | 6           | 0          |
| O66           | 15           | 15          | 5          |
| Y05           | 15           | 2           | 0          |

|    |              |             |             |            |              |             |            |            |
|----|--------------|-------------|-------------|------------|--------------|-------------|------------|------------|
| 1  |              |             |             |            |              |             |            |            |
| 2  | <b>D14</b>   | 12          | 0           | 0          | <b>F01</b>   | 13          | 0          | 0          |
| 3  | <b>W11</b>   | 12          | 0           | 0          | <b>E09</b>   | 11          | 0          | 0          |
| 4  | <b>E17</b>   | 10          | 6           | 0          | <b>M12</b>   | 10          | 3          | 0          |
| 5  | <b>W04</b>   | 10          | 4           | 0          | <b>O72</b>   | 9           | 1          | 0          |
| 6  | <b>Å06</b>   | 10          | 8           | 0          | <b>B05</b>   | 7           | 3          | 0          |
| 7  | <b>Å12</b>   | 10          | 2           | 0          | <b>E08</b>   | 7           | 3          | 0          |
| 8  | <b>E09</b>   | 9           | 1           | 0          | <b>I05</b>   | 7           | 0          | 0          |
| 9  | <b>B05</b>   | 7           | 2           | 0          | <b>G03</b>   | 6           | 2          | 0          |
| 10 | <b>L01</b>   | 7           | 0           | 0          | <b>Z05</b>   | 6           | 0          | 0          |
| 11 | <b>M28</b>   | 7           | 1           | 0          | <b>Å06</b>   | 6           | 4          | 0          |
| 12 | <b>Y08</b>   | 6           | 1           | 0          | <b>D08</b>   | 5           | 4          | 0          |
| 13 | <b>E06</b>   | 5           | 0           | 0          | <b>E06</b>   | 5           | 0          | 0          |
| 14 | <b>F02</b>   | 5           | 0           | 0          | <b>I02</b>   | 5           | 2          | 0          |
| 15 | <b>Å11</b>   | 5           | 0           | 0          | <b>M57</b>   | 5           | 0          | 0          |
| 16 | <b>I02</b>   | 4           | 1           | 0          | <b>Y08</b>   | 3           | 1          | 0          |
| 17 | <b>M37</b>   | 4           | 4           | 0          | <b>F04</b>   | 2           | 2          | 0          |
| 18 | <b>O72</b>   | 4           | 1           | 0          | <b>O71</b>   | 2           | 0          | 0          |
| 19 | <b>D06</b>   | 2           | 0           | 0          | <b>E22</b>   | 1           | 0          | 0          |
| 20 | <b>F01</b>   | 2           | 2           | 0          | <b>Y11</b>   | 1           | 0          | 0          |
| 21 | <b>F10</b>   | 2           | 0           | 0          | <b>Å11</b>   | 1           | 0          | 0          |
| 22 | <b>Y11</b>   | 2           | 0           | 0          | <b>B10</b>   | 0           | 0          | 0          |
| 23 | <b>B10</b>   | 1           | 0           | 0          | <b>D06</b>   | 0           | 0          | 0          |
| 24 | <b>E25</b>   | 1           | 0           | 0          | <b>D14</b>   | 0           | 0          | 0          |
| 25 | <b>F04</b>   | 1           | 0           | 0          | <b>E25</b>   | 0           | 0          | 0          |
| 26 | <b>Z05</b>   | 1           | 0           | 0          | <b>F02</b>   | 0           | 0          | 0          |
| 27 | <b>E11</b>   | 0           | 0           | 0          | <b>F10</b>   | 0           | 0          | 0          |
| 28 | <b>E22</b>   | 0           | 0           | 0          | <b>P04</b>   | 0           | 0          | 0          |
| 29 | <b>F07</b>   | 0           | 0           | 0          | <b>E11</b>   | 0           | 0          | 0          |
| 30 | <b>F08</b>   | 0           | 0           | 0          | <b>F07</b>   | 0           | 0          | 0          |
| 31 | <b>K09</b>   | 0           | 0           | 0          | <b>F08</b>   | 0           | 0          | 0          |
| 32 | <b>O01</b>   | 0           | 0           | 0          | <b>K09</b>   | 0           | 0          | 0          |
| 33 | <b>O46</b>   | 0           | 0           | 0          | <b>O01</b>   | 0           | 0          | 0          |
| 34 | <b>O67</b>   | 0           | 0           | 0          | <b>O46</b>   | 0           | 0          | 0          |
| 35 | <b>O71</b>   | 0           | 0           | 0          | <b>O67</b>   | 0           | 0          | 0          |
| 36 | <b>W13</b>   | 0           | 0           | 0          | <b>W13</b>   | 0           | 0          | 0          |
| 37 | <b>Y07</b>   | 0           | 0           | 0          | <b>Y07</b>   | 0           | 0          | 0          |
| 38 | <b>Y10</b>   | 0           | 0           | 0          | <b>Y10</b>   | 0           | 0          | 0          |
| 39 | <b>Other</b> |             | 147         | 76         | <b>Other</b> |             |            | 104        |
| 40 |              |             |             |            |              |             |            |            |
| 41 | <b>Sum</b>   | <b>2575</b> | <b>1444</b> | <b>423</b> | <b>Sum</b>   | <b>2555</b> | <b>998</b> | <b>358</b> |
| 42 |              |             |             |            |              |             |            |            |
| 43 |              |             |             |            |              |             |            |            |
| 44 |              |             |             |            |              |             |            |            |
| 45 |              |             |             |            |              |             |            |            |
| 46 |              |             |             |            |              |             |            |            |
| 47 |              |             |             |            |              |             |            |            |
| 48 |              |             |             |            |              |             |            |            |
| 49 |              |             |             |            |              |             |            |            |
| 50 |              |             |             |            |              |             |            |            |
| 51 |              |             |             |            |              |             |            |            |
| 52 |              |             |             |            |              |             |            |            |
| 53 |              |             |             |            |              |             |            |            |
| 54 |              |             |             |            |              |             |            |            |
| 55 |              |             |             |            |              |             |            |            |
| 56 |              |             |             |            |              |             |            |            |
| 57 |              |             |             |            |              |             |            |            |
| 58 |              |             |             |            |              |             |            |            |
| 59 |              |             |             |            |              |             |            |            |
| 60 |              |             |             |            |              |             |            |            |

# BMJ Open

## Treatment Outcomes for Eating Disorders in Sweden, 2012-2016 "Data from the National Quality Registry"

|                                 |                                                                                                                                                                                                      |
|---------------------------------|------------------------------------------------------------------------------------------------------------------------------------------------------------------------------------------------------|
| Journal:                        | <i>BMJ Open</i>                                                                                                                                                                                      |
| Manuscript ID                   | bmjopen-2018-024179.R1                                                                                                                                                                               |
| Article Type:                   | Research                                                                                                                                                                                             |
| Date Submitted by the Author:   | 11-Sep-2018                                                                                                                                                                                          |
| Complete List of Authors:       | Södersten, Per; Karolinska Institutet<br>Brodin, Ulf; Karolinska Institutet,<br>Sjöberg, Jennie; Mandometer Clinic<br>Zandian, Modjtaba; Karolinska Institutet<br>Bergh, Cecilia; Mandometer Clinic, |
| <b>Primary Subject Heading</b>: | Public health                                                                                                                                                                                        |
| Secondary Subject Heading:      | Health policy                                                                                                                                                                                        |
| Keywords:                       | Health policy < HEALTH SERVICES ADMINISTRATION & MANAGEMENT, PUBLIC HEALTH, STATISTICS & RESEARCH METHODS                                                                                            |
|                                 |                                                                                                                                                                                                      |

SCHOLARONE™  
Manuscripts



## Treatment Outcomes for Eating Disorders in Sweden, 2012-2016

### “Data from the National Quality Registry”

Per Södersten, Ulf Brodin, Jennie Sjöberg, Modjtaba Zandian, Cecilia Bergh

Department of Neurobiology, Care Sciences and Society, Karolinska Institutet, Mandometer

Clinic, Novum, S-141 04 Huddinge, Sweden

Per Södersten professor em. Email: [per.sodersten@ki.se](mailto:per.sodersten@ki.se)

Ulf Brodin PhD medical statistician em. Email: [ulf.brodin@ki.se](mailto:ulf.brodin@ki.se)

Jennie Sjöberg RN clinical director. Email: [jennie.sjoberg@mando.se](mailto:jennie.sjoberg@mando.se)

Modjtaba Zandian PhD quality controller. Email: [modjtaba.zandin@ki.se](mailto:modjtaba.zandin@ki.se)

Cecilia Bergh PhD clinical director. Email: [cecilia.bergh@mando.se](mailto:cecilia.bergh@mando.se)

4333 words excluding abstract, strengths and limitations, references, acknowledgements, and

figure legends

51 references

5 figures

2 tables

Correspondence to: Per Södersten [per.sodersten@ki.se](mailto:per.sodersten@ki.se)

## Abstract

**Objective** To report the outcomes of eating disorders treatment in Sweden in 2012-2016.

**Design** The number of patients treated and the number of patients not fulfilling an eating disorders diagnosis (remission) at one year of follow-up at the clinics listed in the National Quality Registry for Eating Disorders Treatment were analyzed. The published outcomes at three clinics, that used survival analysis to estimate outcomes, were compared with their outcomes in the registry. Outcomes at the three biggest clinics were compared.

**Setting** All eating disorders clinics.

**Participants** All patients treated at eating disorders clinics.

**Intervention** Cognitive behavioural therapy at most clinics and normalization of eating behaviour at the three clinics with published outcomes.

**Outcome measure** Proportion of patients in remission.

**Results** About 2600 patients were treated annually, fewer than half were followed-up, and remission rates decreased from 21% in 2014 to 14% in 2016. Outcomes, which differed amongst clinics and within clinics over time, have been publically overestimated by excluding patients lost to follow-up. The published estimated rate of remission at three clinics that treated 1200 patients in 1993-2011 was 27, 28, and 40% at one year of follow-up. The average rate of remission over the three last years at the biggest of these clinics was 36%, but decreased from 29 and 30% to 16 and 14% at the two other of the biggest clinics.

**Conclusions** With more than half the patients lost to follow-up and no data on relapse in the National Quality Registry, it is difficult to estimate the effects of eating disorders treatment in

1  
2  
3 Sweden. Analysis of time to clinically significant events, including an extended period of  
4  
5 follow-up, has improved the quality of the estimates at three clinics. Overestimation of  
6  
7 remission rates has misled health care policies. The effect of eating disorders treatment has  
8  
9 also been overestimated internationally.  
10  
11  
12  
13  
14  
15  
16  
17  
18  
19  
20  
21  
22  
23  
24  
25  
26  
27  
28  
29  
30  
31  
32  
33  
34  
35  
36  
37  
38  
39  
40  
41  
42  
43  
44  
45  
46  
47  
48  
49  
50  
51  
52  
53  
54  
55  
56  
57  
58  
59  
60

For peer review only

### Strengths and limitations of this study

- This study has the strength of analyzing all patients treated, followed-up, and treated to remission at all eating disorders clinics over five years in Sweden.
- These outcomes are available in the National Quality Registry for Eating Disorders Treatment but have not been published in the scientific literature.
- Three clinics have published outcomes at three-month intervals making it possible to compare these outcomes with their outcomes in the registry.
- The study has the strength of showing that a time-to-event analysis improves compliance, facilitating estimation of outcomes.
- It is a limitation that whereas outcomes in the registry covered the years 2012-2016, the published outcomes at the three clinics covered the years 1993-2011.

## INTRODUCTION

The National Quality Registries in Sweden have been developed starting in the 1970s and today there are about 100 registries, covering virtually all kinds of disease (1). The Swedish Association of Local Authorities and Regions (SALAR) and the Swedish Government recently agreed to strengthen the registries financially, pointing to their key role in the development of all aspects of health care, improving the quality of care, facilitating research, including international comparisons of outcomes, guiding health care policies, and making it possible for anyone to compare the outcomes of treatment at individual clinics (1,2). Indeed, the SALAR has a website for such comparisons (3).

The Swedish National Quality Registry for Eating Disorders Treatment, Riksät, was established in 1999 and has published 11 reports, written in Swedish, in 2001-2016 (4). Following the aims of the registries, the objective of Riksät is to “document the outcome of treatment” (quote from the first report in 2001). Thus, the important measures are the number of patients treated and the number of patients in remission at follow-up. These numbers are listed in Riksät but have not been analyzed and reported in the scientific literature. The first aim of the present study is to examine the rate of remission at all eating disorders clinics in Sweden.

The results in Riksät have been publicized nationally as demonstrating increasing rates of remission over the years to 56% in 2015 and that “70% of the patients are ‘cured’ within one year” (4,5). Because these outcomes are better than the outcomes reported in the scientific literature (6,7), the second aim of this study is to examine their evidence basis.

There are three clinics in Sweden, that have published outcomes (8). Because these clinics (Mandometer Clinics) also report to Riksät it is possible to compare their published

1  
2  
3 outcomes with their outcomes in Riksät. The biggest of the three Mandometer clinics is the  
4 clinic in the County Council of Stockholm (Mando). The third aim of this study is to compare  
5 the outcomes at Mando with the outcomes at the two other of the biggest clinics in Sweden,  
6 the Stockholm Centre for Eating Disorders (SCED) and the Capio Centre for Eating Disorders  
7 (Capio).  
8  
9  
10  
11  
12

13  
14 The fourth aim of this study is to call the attention of policy makers to the fact that  
15 outcomes of eating disorders treatment have been overestimated not only in Sweden but in  
16 other countries as well.  
17  
18  
19  
20  
21

## 22 **METHODS**

### 23 **Patients and diagnostic procedures**

24  
25 Riksät lists the number of patients entering treatment each year and the number of patients  
26 followed-up one year later, although the exact time of follow-up is not mentioned. More than  
27 90% of the patients entering treatment at the specialist clinics are listed in the registry, but  
28 patients that are treated at general psychiatric units may not be listed. Whilst there is no  
29 information on how many these patients might be, most patients treated are listed in the  
30 registry. There is no information on long term outcome, including relapse.  
31  
32  
33  
34  
35  
36  
37  
38  
39  
40  
41

42 At the beginning of treatment and at follow-up the patients completed the Eating  
43 Disorders Examination Questionnaire (EDE-Q), which measures eating disorders symptoms  
44 (9), and the Clinical Impairment Assessment (CIA), which measures psychosocial functioning  
45 as a consequence of the eating disorder (10). The EDE-Q was used for patients older than 10  
46 years and the CIA was used for patients older than 18 years. A semistructured interview was  
47 used for children and adults to determine overall psychiatric symptoms and social functioning  
48 (see e.g., (11)). Using these procedures, the patients were diagnosed with Anorexia Nervosa,  
49  
50  
51  
52  
53  
54  
55  
56  
57  
58  
59  
60

1  
2  
3 Bulimia Nervosa, Eating Disorder Not Otherwise Specified, or Binge Eating Disorder relying  
4 on the criteria in the Diagnostic and Statistical Manual of Mental Disorders (DSM-IV) (12).  
5  
6 Patients who no longer fulfilled the diagnostic criteria for an eating disorder were listed as in  
7 remission. About 4-5% of the patients in the yearly reports had been treated before when  
8 entering treatment.  
9  
10  
11  
12

13  
14 Riksät reports changes in the patients' social functioning and their experiences of the  
15 treatment, and these secondary measures improve in parallel as patients go into remission but  
16 will not be considered in this analysis.  
17  
18  
19  
20

21  
22 Whilst Riksät thus includes two time points for assessment, the Mandometer clinics  
23 have developed a treatment in which the patients are assessed at three-month intervals and  
24 followed-up 1, 2, 3, 6, 9, 12, 18, 24, 36, 48, and 60 months after remission. The procedures,  
25 including the criteria for inclusion, exclusion, and remission were published in 2002 (13), and  
26 have been re-published many times (e.g., (8)); another description may be redundant. The  
27 Mandometer clinics also report their outcomes to Riksät.  
28  
29  
30  
31  
32  
33  
34  
35

### 36 **Treatments**

37  
38  
39 The 2012-2014 Riksät reports did not specify the treatments used beyond mentioning that  
40 these were guided by "the principles of cognitive behavioural therapy" (CBT) and that they  
41 could be used with individual patients or with groups of patients. Medical intervention was  
42 used for monitoring and restoring physical health and psychopharmacology was also used,  
43 absence of evidence of their efficiency was pointed out. The 2015-2016 reports provide  
44 details on treatments. Thus, CBT was used with on average 52% of the children and with 72%  
45 of the adults, psychodynamic therapy was used with on average 21% of the children and with  
46 24% of the adults, and family-based therapies were used with on average 38% of the children.  
47  
48  
49  
50  
51  
52  
53  
54  
55  
56  
57  
58  
59  
60

1  
2  
3 The treatment developed at the Mandometer clinics was described in 1996 (14), re-published  
4 some years on (8,13), and because it has since been described in several other papers, another  
5 description may be redundant. Suffice it to say that an important intervention is teaching  
6 patients how to eat normally using real time visual feedback on how much food to eat and  
7 how quickly to eat it. A video of how this method works was published recently (15). In  
8 addition, the patients are provided with warmth, that exerts an anxiolytic effect in 30 minutes  
9 (16), their physical activity is reduced, and they are assisted in restarting their social  
10 interactions (13). Interestingly, re-establishing normal eating behaviour is also the most  
11 important intervention in CBT, although it is not clear how this is achieved (7).  
12  
13  
14  
15  
16  
17  
18  
19  
20  
21  
22

### 23 **Description of outcomes**

24  
25  
26 Initially, Riksät reported the combined outcomes at the clinics across regions in Sweden, the  
27 reports published in 2009 and 2010 were incomplete, and no report was published in 2011.  
28  
29 However, the outcomes at individual clinics were reported in 2012-2016. The number of  
30 patients treated at each clinic and the proportion of patients who were followed-up are listed  
31 in one set of tables in these reports. The number and the proportion of patients in remission at  
32 follow-up are listed in another set of tables. These numbers have been combined into one  
33 table (supplementary table) and used in the analysis.  
34  
35  
36  
37  
38  
39  
40  
41  
42

### 43 **Combined outcomes at all clinics**

44  
45  
46 The numbers of patients treated, followed-up, and treated to remission have been summarized  
47 for all clinics. The number of patients in remission has been related to the number of patients  
48 treated as well as to the number of patients followed-up in an attempt to explain the high  
49 remission rates publicized in Sweden.  
50  
51  
52  
53  
54  
55  
56  
57  
58  
59  
60



1  
2  
3 If the treatment and the follow-up assessments are about the same at all clinics, the  
4 probability for remission should be the same in all clinics. This hypothesis, which can be  
5 formalized as:  $H_0: P_i(\text{Remission}) = P_0(\text{Remission})$  for all clinics,  $i=1, 2, 3, \dots, n$ , was tested  
6 using a test for homogeneity of the data (17).  
7  
8  
9  
10

11  
12 In 2012-2013 Riksät listed the number of clinics that treated and followed-up at least 20  
13 patients. The number of patients treated to remission at these clinics was listed in 2012, but in  
14 2013 the number of patients treated to remission included clinics that had followed-up at least  
15 10 children or 10 adult patients. In 2014-2016 the number of patients treated, followed-up,  
16 and treated to remission was listed for all clinics. Using these data (supplementary table), the  
17 number of clinics following-up at least 20 patients have been analyzed. Outcomes at clinics  
18 following-up fewer than 10 patients have also been analyzed.  
19  
20  
21  
22  
23  
24  
25  
26  
27

### 28 **Published outcomes at Mandometer clinics**

29  
30  
31 Mandometer clinics have published the outcomes of 1428 patients treated at six clinics in four  
32 countries over various periods of time in 1993-2011, and these data are available in the  
33 supplementary files of (8). The three Swedish clinics, in Alingsås, Danderyd, and Huddinge,  
34 treated 1200 of these patients. The clinic in Huddinge, within the Stockholm County Council,  
35 is the oldest clinic and is referred to as Mando in this analysis. The probability of going into  
36 remission over consecutive three-month intervals up to 12 months at these clinics was  
37 estimated using a life-table approach to survival analysis (18). The rate of failure amongst  
38 censored patients was estimated to be 20%, yielding a conservative estimate of treatment  
39 outcomes. This analysis allows comparison between these published outcomes and the  
40 outcomes for the same clinics listed in Riksät.  
41  
42  
43  
44  
45  
46  
47  
48  
49  
50  
51  
52  
53

### 54 **Outcomes at individual clinics**

Outcomes were compared amongst SCED, Capio, and Mando.

### Patient and public involvement

This study is an analysis of patient data in a registry and those patients did not participate in the analysis. The results will be openly available at mandometer.com.

## RESULTS

### Patient characteristics

The characteristics of the patients at the start of treatment were stable over all years and measures of variability are therefore not included. The average proportion of males was 4.6%, the average proportion of children and adolescents, who were <18 years old, was 29%. The age, obviously, was variable and the average mean (SD) age of all patients was 23.1 (8.9) years. The proportion of the various eating disorders diagnoses was also stable over the years and average values are presented in Table 1.

**Table 1.** Diagnoses amongst patients entering treatment for eating disorders in Sweden in 2012-2016. There were about 2600 patient each year and the proportions are averaged over these years. Children were <18 years old.

| <u>Diagnosis</u>                        | <u>Proportion (%)</u> |               |
|-----------------------------------------|-----------------------|---------------|
|                                         | <u>Children</u>       | <u>Adults</u> |
| Anorexia Nervosa                        | 39                    | 20            |
| Bulimia Nervosa                         | 8                     | 32            |
| Eating Disorder Not Otherwise Specified | 45                    | 37            |

|                       |   |   |
|-----------------------|---|---|
| Binge Eating Disorder | 1 | 6 |
| Other*                | 7 | 5 |

\*Not specified.

### Combined outcomes at all clinics

Figure 1 shows that the total number of patients treated at all clinics increased to about 2600 in 2013, and remained relatively stable over the following years. The figure also shows that fewer than half the patients were typically followed-up a year later and that the rate of remission was about 21% in 2012-2014, and decreased to 14% in 2016. The number of patients treated to remission increased from 477 in 2012 to 589 in 2014 and decreased to 358 in 2016. There is no information on possible differences in the number of patients in remission related to the diagnosis at the start of treatment.

--- Please insert Figure 1 about here ---

Figure 2 shows firstly, that the rate of remission at all clinics that followed-up their patients was less than 50% in 2012-2014, 29% in 2015, and 36% in 2016. Secondly, the figure shows that the rate of remission at clinics that had treated at least one patient to remission increased to 56% in 2015 and decreased to 54% in 2016. The second analysis thus excluded patients followed-up at clinics that did not treat a single patient to remission. The significance of these two calculations of remission rates is clarified in the Discussion.

--- Please insert Figure 2 about here ---

### Variability in outcomes

1  
2  
3 The probability of going into remission in 2012 was significantly different amongst the 17  
4 clinics that had treated patients in all recorded years ( $P < 0.001$ ;  $\text{Chi}^2 = 80.2$ ,  $\text{df} = 16$ ). The  
5 probability of going into remission was also significantly different amongst the five clinics  
6 that had treated at least 100 patients in 2012 ( $P < 0.001$ ;  $\text{Chi}^2 = 23.7$ ,  $\text{df} = 4$ ). Analysis of the other  
7 years gives similar results.  
8  
9  
10  
11  
12

13  
14 Analysis of the results at SCED showed that the probability of going into remission was  
15 significantly different over the years ( $P < 0.001$ ;  $\text{Chi}^2 = 46.3$ ,  $\text{df} = 4$ ). Analysis of the other  
16 clinics gives similar results.  
17  
18  
19  
20

### 21 22 **Combined outcomes at clinics that followed-up at least 20 patients**

23  
24 Because Riksät reported on clinics that had followed-up at least 20 patients in 2012-2013 and  
25 for all clinics in 2014-2016, the number of clinics reporting their outcomes was lower in  
26 2012-2013 (21 and 23) than in 2014-2016 (70, 64, and 59). However, it is possible to compare  
27 how many clinics had treated, followed-up, and treated at least 20 patients to remission in  
28 2012-2016.  
29  
30  
31  
32  
33  
34  
35

36  
37 Figure 3 shows that more clinics had treated at least 20 patients in 2016 than in 2012.  
38 Whereas the clinics that had treated at least 20 patients in 2012 were selected for having  
39 followed them up, only 45% of these clinics followed-up at least 20 patients in 2016. About  
40 one in three of these clinics had treated at least 20 patients to remission in 2012 compared to  
41 about one in eight in 2016. The results in the other years fall in between the results in 2012  
42 and 2016.  
43  
44  
45  
46  
47  
48  
49  
50

51 --- Please insert Figure 3 about here ---  
52  
53  
54  
55  
56  
57  
58  
59  
60

1  
2  
3 Out of the 33 clinics that had treated at least 20 patients in 2016 (Figure 3, green bar at  
4 the very left), three (9%) had not followed-up any patient, and 21 (64%) had not treated a  
5 single patient to remission. These 21 clinics had treated a total of 857 patients, with a median  
6 (range) of 32 (20-98) patients/clinic.  
7  
8  
9  
10

### 11 12 **Combined outcomes at clinics that followed-up fewer than 10 patients**

13  
14  
15 Figure 4 shows that amongst the about 2600 patients who were treated annually in 2013-2016,  
16 the number of patients treated at clinics that followed-up fewer than 10 patients increased to  
17 more than 1000 in the last two years. In parallel, the proportion of patients who were  
18 followed-up and treated to remission at these clinics decreased. Fewer than one in ten of the  
19 patients were treated to remission in the final three years. Please note that the values for 2012  
20 include clinics that followed up fewer than 20 patients. Clinics following-up fewer than 10  
21 patients were not reported separately this year.  
22  
23  
24  
25  
26  
27  
28  
29  
30

31  
32 --- Please insert Figure 4 about here ---  
33  
34

### 35 **Published outcomes at Mandometer clinics**

36  
37  
38 Table 2 shows that the proportion of patients in remission at 12 months assessments was at  
39 least 27% and significantly different at the three Mandometer clinics, whose outcomes are  
40 published. Treatment continues after the 12 months at these clinics and the proportion of  
41 patients in remission increases after various, prolonged periods of time. Please note that these  
42 clinics had been operating over various periods of time.  
43  
44  
45  
46  
47  
48  
49  
50  
51  
52  
53  
54  
55  
56  
57  
58  
59  
60

**Table 1.** Proportion of patients in remission at Mandometer clinics.

| Outcome                             | Clinic    |           |           |
|-------------------------------------|-----------|-----------|-----------|
|                                     | Alingsås  | Danderyd  | Mando     |
| Operation (years)                   | 2         | 7         | 18        |
| <u>12 months assessment</u>         |           |           |           |
| Patients in remission               | 13        | 72        | 219       |
| Patients not in remission           | 36        | 107       | 552       |
| Proportion in remission             | 27        | 40*       | 28        |
| <u>Continued treatment (months)</u> |           |           |           |
| Patients in remission               | 19        | 141       | 490       |
| Patients not in remission           | 27        | 27        | 170       |
| <u>Proportion in remission</u>      | <u>39</u> | <u>82</u> | <u>68</u> |

\*P=0.0017 compared to Alingsås and Mando after P=0.0069 (overall difference).

It may be mentioned that the time to remission depends on the diagnosis at admission, with the longest time to remission for patients with anorexia nervosa (8).

### **Outcomes at the three biggest clinics**

SCED had treated about four times more patients annually (median: 715; range: 696-724) than Capiro (175; 157-178) and Mando (123; 81-168), and followed-up about the same proportion of patients (43; 32-69%) as Capiro (50; 48-65%) and Mando (43; 32-83%). These proportions are similar to the average proportions of follow-up at all clinics over these years (Figure 1).

Figure 5 shows that Mando had treated a bigger proportion of patients to remission than SCED and Capiro in 2014-2016. Whilst the rate of remission was relatively stable at on average 36% at Mando over these three years, it decreased from 29% to 16% at SCED and from 30% to 14% at Capiro. In 2016, the proportion of patients treated to remission at Mando (35%) was about twice as big as the corresponding proportion at SCED (16%) and Capiro (14%).

--- Please insert Figure 5 about here ---

## **DISCUSSION**

### **Patient characteristics, diagnostic procedures, and treatments**

The characteristics of the patients, who have been treated for eating disorders in Sweden, including the proportion of males and children, age and diagnosis, have been relatively stable in recent years and are similar to the characteristics of eating disorders patients in other countries (19). It is worth noting that whilst a minority of the patients were diagnosed with Binge Eating Disorder, that disorder is now the most common eating disorder (20). Although the diagnostic procedures may differ amongst clinics (19), most of the procedures used in Sweden have been developed in other countries. In addition, the treatments used in Sweden,

1  
2  
3 including CBT, psychodynamic therapy, and family therapy, as well as medical and  
4  
5 psychopharmacological interventions aiming at restoring physical and mental health are the  
6  
7 same as those recommended in the guidelines and used in most countries (19,21–26). The  
8  
9 treatment at the Mandometer clinics differs in that an important intervention is the  
10  
11 normalization of eating behaviour using real time visual feedback on how to eat as described  
12  
13 many times and most recently by video (15). The differences and similarities amongst the  
14  
15 Mandometer treatment and CBT have been described in detail recently, including the  
16  
17 differences in outcomes (7).  
18  
19  
20

### 21 **Outcomes in Sweden**

22  
23  
24 About 2600 patients were treated annually at the eating disorders clinics in Sweden in 2012-  
25  
26 2016, fewer than half were followed-up, and the proportion of patients treated to remission  
27  
28 decreased from one in five in 2012 to less than one in seven in 2016. However, remission  
29  
30 rates which are more than three times higher have been publicized nationally. These estimates  
31  
32 were derived by excluding patients lost to follow-up and patients followed-up at clinics that  
33  
34 did not treat patients to remission. In 2016, only four clinics treated 20 patients to remission;  
35  
36 most clinics treated a small number of patients, followed-up a few, and treated only one  
37  
38 patient in ten to remission. Outcomes varied significantly between clinics each year and  
39  
40 within clinics over years. In addition, in 2016 more than half the 33 clinics that had treated on  
41  
42 average 32 patients had failed to treat a single patient to remission; one of these clinics had  
43  
44 treated 98 patients unsuccessfully.  
45  
46  
47  
48

### 49 **Interpretation and comparison with published outcomes**

50  
51  
52 Whilst these findings indicate that the procedures of treatment and follow-up differ amongst  
53  
54 clinics in Sweden, a word of caution seems appropriate. For example, although outcomes  
55  
56  
57  
58  
59  
60



1  
2  
3 were significantly different over years at the biggest clinic (SCED), patients were treated to  
4  
5 remission all years, suggesting that a statistically significant within-clinic variation may be  
6  
7 less significant clinically. However, it seems unlikely that the decrease from a rate of  
8  
9 remission of about 30% in 2014 at this clinic to about half that rate two years later is a matter  
10  
11 of random variation. And the similar decrease in the rate of remission at another clinic in  
12  
13 these years (Capiro) suggests that the procedures at these clinics had deteriorated, at least  
14  
15 temporarily.  
16  
17

18  
19 Possible reasons for the variation in outcomes include changes in staffing, training of  
20  
21 staff, patient compliance to treatment, and the physical conditions in the clinics, factors that  
22  
23 affect outcomes in multicenter clinical trials (27). Whilst the “study protocol” of the  
24  
25 multicenter trial aims at reducing the influence of these factors, there is no standard protocol  
26  
27 for the treatment of eating disorders. And although there is agreement that the treatment  
28  
29 guidelines for eating disorders should be followed, this consensus view has not yet improved  
30  
31 outcomes (21–23,25,28–30). For example, an attempt at implementing CBT, which is  
32  
33 recommended in all guidelines, in combination with antidepressant medication for the  
34  
35 treatment of bulimia nervosa in primary care in the U.S. resulted in a 70% dropout rate (31).  
36  
37 A similar effort in general practice in the U.K. found that out of 683 patients with a diagnosis  
38  
39 of bulimia, about half of the 272 patients who entered CBT completed the treatment, and  
40  
41 although those patients improved, they were not free of eating disorders symptoms after  
42  
43 treatment (32). A recent study aiming to implement CBT for anorexia nervosa in general  
44  
45 practice produced similar results. Thus, out of 257 patient referrals, 44 patients started in  
46  
47 treatment and 22 completed the treatment (33), findings that were replicated in another recent  
48  
49 study (34). Compliance is thus a general problem in the treatment of eating disorders, not a  
50  
51 “Swedish” problem, but it can be improved as discussed below.  
52  
53  
54  
55  
56  
57  
58  
59  
60

1  
2  
3 Whether these factors are causally related to the decrease in remission rates in 2015-  
4 2016 remains to be determined. But it may be of some significance that as the number of  
5 patients treated at clinics that treated fewer than ten patients to remission increased, the  
6 proportion of patients followed-up and treated to remission decreased (Figure 4). And when  
7 the number of patients followed-up at all clinics increased in 2015, there was a marked  
8 decrease in the proportion of patient treated to remission (Figures 1 and 2).  
9  
10  
11  
12  
13  
14  
15

16  
17 The Mandometer treatment was developed starting in 1993, a theoretical framework and  
18 preliminary findings were reported in 1996 (14,35). A randomized controlled trial  
19 demonstrated its effectiveness and outcomes for 1428 patients treated at six clinics in four  
20 countries were subsequently reported (8,13). The combined rate of remission at these clinics  
21 was estimated to be about 75% in on average one year of treatment and the rate of relapse was  
22 estimated to be about 10% over five years of follow-up (8). Similar to Riksät, estimates were  
23 done amongst all patients entering treatment. However, far more patients were lost to follow-  
24 up at Riksät's one year time point of follow-up than to Mandometer's procedure of  
25 monitoring patients at three-month intervals throughout treatment and at 1, 2, 3, 6, 9, 12, 18,  
26 24, 36, 48, and 60 months of follow-up (8). Despite the difference, the rate of remission at the  
27 Mando clinic in the Stockholm County Council was on average 33% in 2012-2016 according  
28 to the Riksät calculation, which is about half the estimated published 75% rate of remission  
29 after on average one year of treatment (8).  
30  
31  
32  
33  
34  
35  
36  
37  
38  
39  
40  
41  
42  
43  
44  
45

46 Average remission rates should be viewed cautiously as outcomes varied between  
47 clinics. Thus, the published rate of remission at 12 months differed significantly at the three  
48 Mandometer clinics, yet it was higher than the average values reported for all clinics in each  
49 of the five years in Riksät. Differences in treatment methods between the Mandometer clinics  
50 and the other clinics may explain the differences in outcomes (7) and it is possible that  
51  
52  
53  
54  
55  
56  
57  
58  
59  
60

1  
2  
3 outcomes will be more consistent at the Mandometer clinics once they have been operating  
4  
5 for a longer period of time. For example, the Alingsås clinic had been treating patients for  
6  
7 only two years and reached a rate of remission of only 39%. The variation in the rate of  
8  
9 remission at 12 months at the Mandometer clinics in Amsterdam (16%), San Diego (52%),  
10  
11 and Melbourne (25%) (8), support previous findings that international cultural and medical  
12  
13 system differences also affect treatment outcomes (36). Thus, patients treated in San Diego  
14  
15 improved rapidly, but they were often prevented from continuing in treatment because of the  
16  
17 financial constraints of their insurance policies (8), a problem that would not affect patients in  
18  
19 Sweden. It should be noted that relatively few patients had been treated at these clinics.  
20  
21  
22

23 Dropout and relapse are significant events in the treatment of eating disorders (7,37,38),  
24  
25 and neither these events, nor remission, should be expected to occur after a predetermined  
26  
27 period of time such as at one year of follow-up as used in Riksät. Also, the precise time for  
28  
29 follow-up is not mentioned. It seems likely that this procedure explains why more than half  
30  
31 the patients were lost to follow-up in Riksät. Practical approaches to survival analysis,  
32  
33 including time-to-event analysis, are long available (18,39) and should be used in studies of  
34  
35 outcomes of eating disorders treatment. The higher level of compliance at the Mandometer  
36  
37 clinics (8) offers support for their value.  
38  
39  
40

41 Considering the difference between outcomes at Mando and the other Swedish clinics,  
42  
43 including the fact that several hundred patients have been treated to remission, and that the  
44  
45 rate of relapse has been reduced to an estimated 10% at the Mando clinics, a randomized  
46  
47 controlled trial comparing outcomes at these clinics may be redundant; an attempt at a  
48  
49 comparison (40), was fraught with problems (8). The major treatment in Swedish clinics is  
50  
51 CBT and a detailed analysis showed that the remission rates after CBT are lower than those  
52  
53 after Mandometer treatment (7). Psychodynamic therapy is also used in Swedish clinics,  
54  
55  
56  
57  
58  
59  
60

1  
2  
3 although outcomes of this therapy are inferior to those of CBT (41). Similarly, the use of  
4 family-based therapies with children in Sweden as in other countries, probably does not  
5 explain the differences in outcomes. But differences in patient characteristics at admission  
6 may contribute to differences in treatment outcomes and even if the published literature  
7 indicates that they do not (42), the possibility that such differences exist should be examined.  
8  
9  
10  
11  
12

### 13 14 15 **Implications for policy makers**

16  
17  
18 Overestimations of the outcomes of the treatment for eating disorders in Sweden have been  
19 publicized over several years (4), including the claim that “70% of the patients are ‘cured’  
20 within one year”, which is maintained on Sweden’s National Educational Radio Channel (5).  
21 This is similar to the international claim that CBT is “efficacious for a range of eating  
22 disorder presentations in the short and long-term” (30), publicized as: “Based on a solid  
23 empirical foundation, the transdiagnostic enhanced CBT approach will immediately become  
24 the gold standard for the treatment of eating disorders” (43), and “[the effect of CBT] is the  
25 most dramatic that we have seen in the literature ... [including] the potency ... and the  
26 impressive maintenance of change over the 19-months follow-up” (44). The published  
27 evidence does not support these claims (7,45–47) and evidence that the outcomes of CBT  
28 have been overestimated for the treatment of other disorders is gradually emerging (48,49).  
29 These overstatements have misinformed health policy makers and can now be corrected.  
30  
31  
32  
33  
34  
35  
36  
37  
38  
39  
40  
41  
42  
43  
44

45 In order to guide decisions on matters of health care, National and International Quality  
46 Registries must offer reliable information. Widely publicized “facts” need to be critically  
47 examined. Policy makers should be aware that once ill advised policies have been established,  
48 retrospectively controlling their evidence basis can be ineffective, and even strengthen the  
49 misguided policy (50,51).  
50  
51  
52  
53  
54  
55  
56  
57  
58  
59  
60

## Acknowledgements

We thank Sara Norring, Riksät, Anna Sandelin, the Centre of Registries Västra Götaland, and Fredrik Westander and Lale Björne-Fergéus, SALAR, for information on Riksät.

## Transparency declaration

Södersten affirms that the manuscript is an honest, accurate, and transparent account of the study being reported; that no important aspects of the study have been omitted; and that any discrepancies from the study as planned (and, if relevant, registered) have been explained.

## Ethics approval

The project was approved by the Regional Ethical Review Board of Stockholm (Dnr 2015/456-31).

## Authors

Södersten examined the registry data in detail over the last two years. He reviewed his examinations for all authors at regular intervals during the examination period. He is responsible for the overall content as guarantor and assumes responsibility for all aspects of the work. All data used for the analysis are included as a supplementary table to this submission, which all authors are happy to share with other researchers.

Brodin is medical statistician and has performed all statistical analyses and reviewed these for all authors at regular intervals during the examination period.

Sjöberg is clinical director of the Mandometer Clinic in Alingsås and responsible for treatment and data collection and reporting to the registry in 2012-2016.

1  
2  
3 Zandian is clinical quality controller and has been responsible for data collection and  
4  
5 reporting to the registry in 2012-2016.  
6

7  
8 Bergh is clinical director for the Mandometer Clinic in Huddinge and responsible for  
9  
10 treatment at all Mandometer clinics.  
11

12  
13 All authors have seen and reviewed several versions of the manuscript and agreed to its final  
14  
15 version.  
16

17  
18 Södersten is: “the corresponding author and attests that all listed authors meet authorship  
19  
20 criteria and that no others meeting the criteria have been omitted”.  
21  
22

### 23 24 **Contributorship**

25  
26  
27 Åsa Lundqvist BA of the Mandometer Clinic in Stockholm has been contact person with the  
28  
29 Rikät registry staff over the years 2012-2016. Ms Lundqvist supervised the reporting of data  
30  
31 to the registry and is in charge of the follow-up programme of the Mandometer Clinic.  
32  
33

### 34 35 **Competing interests**

36  
37  
38 Complete openness concerning financial arrangements is intended here. Brodin, Sjöberg and  
39  
40 Zandian declare that they have no financial interests related to this study. Our research is  
41  
42 carried out at the Karolinska Institute, where Södersten is a professor em. The research is  
43  
44 translated clinically by Mando Group AB, a company started by Södersten and Bergh, who  
45  
46 have 47.5% of the stock each. Professor Michael Leon of the University of California at  
47  
48 Irvine has 5%. Mando Group AB contracts with the County Council of Stockholm every fifth  
49  
50 year to treat patients with eating disorders. Mando Groups AB signed its first contract in 1997  
51  
52 with the County Council of Stockholm and, since then, its treatment is one of the standards of  
53  
54 care offered to the citizens of Stockholm. This arrangement is the same as when the County  
55  
56  
57

1  
2  
3 Council of Stockholm contracts with its own clinics to treat patients with all kinds of disease,  
4 including eating disorders. That is to say, the County Council of Stockholm provides eating-  
5 disorder services to the citizens of Stockholm both through a clinic of its own and through  
6  
7 Mando Group AB. There is a third provider of care for patients with eating disorders in  
8  
9 Stockholm, which is a private clinic. All health care in Sweden is funded through the tax  
10  
11 system; private pay is extremely uncommon. It should be added firstly, that Mando Group AB  
12  
13 is in compliance with the recommendation of the International Committee of Medical Journal  
14  
15 Editors on “Author Responsibilities-Conflicts of Interest”  
16  
17 [http://www.icmje.org/recommendations/browse/roles-and-responsibilities/author-](http://www.icmje.org/recommendations/browse/roles-and-responsibilities/author-responsibilities--conflicts-of-interest.html)  
18  
19 [responsibilities--conflicts-of-interest.html](http://www.icmje.org/recommendations/browse/roles-and-responsibilities/author-responsibilities--conflicts-of-interest.html). Secondly, it should also be added that all profit  
20  
21 that Mando Group AB has made has been re-invested in research and development and that  
22  
23 there have been no dividends to stock owners. All of the above is declared in all manuscript  
24  
25 submissions and thus far, journals have judged it necessary to publish only some of the  
26  
27 details. It seems, however, that the potential ethical problem when scientists translate their  
28  
29 research findings into the clinic in a company is not unlike that which arises when any  
30  
31 scientist, in an academic setting is developing a theory and needs further economic funding  
32  
33 for her/his work and may receive recognition and financial benefits for the work. The  
34  
35 incentive is, in part, economic in this case as well and the ethical “problem” is similar in both  
36  
37 cases. However, the more important incentive is the improvement of the treatment of patients  
38  
39 with eating disorders. We are researchers working in an academic setting and like many other  
40  
41 medical research institutes today, the Karolinska Institute encourages scientists to translate  
42  
43 their research into the clinic in companies that aim to generate financial profits to be used for  
44  
45 research and development (see:  
46  
47 [http://ki.se.proxy.kib.ki.se/sites/default/files/summary\\_strategy2018.pdf](http://ki.se.proxy.kib.ki.se/sites/default/files/summary_strategy2018.pdf)).

## 54 55 **Funding**

1  
2  
3 This work was supported by The County Council of Stockholm grant number HNSV 15896,  
4  
5 HSN 1502-0291, project 3252.  
6  
7

### 8 **Role of the sponsor**

9

10  
11 The sponsor had no influence on the work.  
12  
13

### 14 **Data sharing statement**

15

16  
17 The data used for this analysis are available in a supplementary table.  
18  
19  
20  
21  
22  
23  
24  
25  
26  
27  
28  
29  
30  
31  
32  
33  
34  
35  
36  
37  
38  
39  
40  
41  
42  
43  
44  
45  
46  
47  
48  
49  
50  
51  
52  
53  
54  
55  
56  
57  
58  
59  
60



## References

1. Swedish Association of Local Authorities and Regions. Swedish National Quality Registries [Internet]. [cited 2018 May 7]. Available from: <http://kvalitetsregister.se/englishpages.2040.html>
2. Government Offices of Sweden. Överenskommelse om stöd till nationella kvalitetsregister under 2018 [Internet]. [cited 2018 May 7]. Available from: <http://www.regeringen.se/overenskommelser-och-avtal/2017/12/nationella-kvalitetsregister/>
3. Swedish Association of Local Authorities and Regions. Vården i Siffror [Internet]. [cited 2018 May 7]. Available from: <https://vardenisiffror.se/>
4. Birgegård A, Norring C, Norring S. National Quality Register for Eating Disorders Treatment [Internet]. [cited 2018 May 7]. Available from: <https://riksat.registercentrum.se/>
5. von Hausswolff-Juhlin Y. Från evidens till praktiska råd [Internet]. [cited 2018 May 7]. Available from: <https://urplay.se/program/203090-ur-samtiden-ny-kunskap-om-atstorningar-fran-evidens-till-praktiska-rad>
6. Linardon J, Wade TD, de la Piedad Garcia X, Brennan L. The efficacy of cognitive-behavioral therapy for eating disorders: A systematic review and meta-analysis. *J Consult Clin Psychol*. 2017 Nov;85(11):1080–94.
7. Södersten P, Bergh C, Leon M, Brodin U, Zandian M. Cognitive behavior therapy for eating disorders versus normalization of eating behavior. *Physiol Behav*. 2017 Mar 16;174:178–90.
8. Bergh C, Callmar M, Danemar S, Hölcke M, Isberg S, Leon M, et al. Effective treatment of eating disorders: Results at multiple sites. *Behav Neurosci*. 2013 Dec;127(6):878–89.
9. Fairburn C, Cooper Z, O'Connor M. Eating disorders examination (16.0D). In C. Fairburn (Ed.), *Cognitive behavior therapy and eating disorders*. New York, N.Y: Guilford Press; 2008.
10. Bohn K, Fairburn CG. Clinical impairment assessment questionnaire (CIA 3.0). In: *Cognitive behavior therapy for eating disorders*. New York, N.Y: Guildford Press; p. 315–7.
11. Aas IHM. Global Assessment of Functioning (GAF): properties and frontier of current knowledge. *Ann Gen Psychiatry*. 2010 May 7;9:20.
12. American Psychiatric Association. *Diagnostic and Statistical Manual of Mental Disorders*. fourth ed. Washington, D.C.: American Psychiatric Association; 1994.
13. Bergh C, Brodin U, Lindberg G, Södersten P. Randomized controlled trial of a treatment for anorexia and bulimia nervosa. *Proc Natl Acad Sci*. 2002 Jul 9;99(14):9486–91.

14. Bergh C, Eklund S, Eriksson M, Lindberg G, Södersten P. A new treatment of anorexia nervosa. *The Lancet*. 1996 Aug 31;348(9027):611–2.
15. Esfandiari M, Papapanagiotou V, Diou C, Zandian M, Nolstam J, Södersten P, et al. Control of eating behavior using a novel feedback system. *J Vis Exp JoVE*. 2018 08;(135).
16. Zandian M, Holmstedt E, Larsson A, Bergh C, Brodin U, Södersten P. Anxiolytic effect of warmth in anorexia nervosa. *Acta Psychiatr Scand*. 2017;135(3):266–7.
17. Kirkwood BR, Sterne JAC. *Essential Medical Statistics*. Blackwell, Oxford; 2003.
18. Tableman M, Kim JS. *Survival Analysis Using S: Analysis of Time-to-Event Data*. Boca Raton, FL: Chapman & Hall/CRC; 2004.
19. Treasure J, Claudino AM, Zucker N. Eating disorders. *The Lancet*. 2010 Feb 19;375(9714):583–93.
20. Erskine HE, Whiteford HA. Epidemiology of binge eating disorder. *Curr Opin Psychiatry*. 2018 Aug 13;
21. af Sandeberg A-M, Birgegård A, Mohlin L, Nordlander Ström C, Norring C, Siverstrand M-L. Regionalt vårdprogram – ätstörningar. [Internet]. [cited 2018 May 7]. Available from: [http://www1.psykiatristod.se/Global/vardprogram\\_fulltext/RV\\_Atstorningar\\_2009\\_updat\\_2010.pdf](http://www1.psykiatristod.se/Global/vardprogram_fulltext/RV_Atstorningar_2009_updat_2010.pdf)
22. Hay P, Chinn D, Forbes D, Madden S, Newton R, Sugenor L, et al. Royal Australian and New Zealand College of Psychiatrists clinical practice guidelines for the treatment of eating disorders. *Aust N Z J Psychiatry*. 2014 Nov 1;48(11):977–1008.
23. Hay PP, Bacaltchuk J, Stefano S, Kashyap P. Psychological treatments for bulimia nervosa and bingeing. *Cochrane Database Syst Rev*. 2009 Oct 7;(4):CD000562.
24. Hay P. A systematic review of evidence for psychological treatments in eating disorders: 2005–2012. *Int J Eat Disord*. 2013 Jul 1;46(5):462–9.
25. Zipfel S, Giel KE, Bulik CM, Hay P, Schmidt U. Anorexia nervosa: aetiology, assessment, and treatment. *Lancet Psychiatry*. 2015 Dec;2(12):1099–1111.
26. Treasure J, Zipfel S, Micali N, Wade T, Stice E, Claudino A, et al. Anorexia nervosa. *Nat Rev Dis Primer*. 2015 26;1:15074.
27. Guthrie LB, Oken E, Sterne JA, Gillman MW, Patel R, Vilchuck K, et al. Ongoing monitoring of data clustering in multicenter studies. *BMC Med Res Methodol*. 2012 Mar 13;12:29.
28. Allen S, Dalton WT. Treatment of eating disorders in primary care: a systematic review. *J Health Psychol*. 2011 Nov;16(8):1165–76.

- 1
  - 2
  - 3
  - 4
  - 5
  - 6
  - 7
  - 8
  - 9
  - 10
  - 11
  - 12
  - 13
  - 14
  - 15
  - 16
  - 17
  - 18
  - 19
  - 20
  - 21
  - 22
  - 23
  - 24
  - 25
  - 26
  - 27
  - 28
  - 29
  - 30
  - 31
  - 32
  - 33
  - 34
  - 35
  - 36
  - 37
  - 38
  - 39
  - 40
  - 41
  - 42
  - 43
  - 44
  - 45
  - 46
  - 47
  - 48
  - 49
  - 50
  - 51
  - 52
  - 53
  - 54
  - 55
  - 56
  - 57
  - 58
  - 59
  - 60
29. Le Grange D, Hughes EK, Court A, Yeo M, Crosby RD, Sawyer SM. Randomized clinical trial of parent-focused treatment and family-based treatment for adolescent anorexia nervosa. *J Am Acad Child Adolesc Psychiatry*. 2016 Aug;55(8):683–92.
30. Linardon J, Fairburn CG, Fitzsimmons-Craft EE, Wilfley DE, Brennan L. The empirical status of the third-wave behaviour therapies for the treatment of eating disorders: A systematic review. *Clin Psychol Rev*. 2017 Dec;58:125–40.
31. Walsh BT, Fairburn CG, Mickley D, Sysko R, Parides MK. Treatment of bulimia nervosa in a primary care setting. *Am J Psychiatry*. 2004 Mar;161(3):556–61.
32. Knott S, Woodward D, Hoefkens A, Limbert C. Cognitive behaviour therapy for bulimia nervosa and eating disorders not otherwise specified: Translation from randomized controlled trial to a clinical setting. *Behav Cogn Psychother*. 2015 Nov;43(6):641–54.
33. Frostad S, Danielsen YS, Rekkedal GÅ, Jevne C, Dalle Grave R, Rø Ø, et al. Implementation of enhanced cognitive behaviour therapy (CBT-E) for adults with anorexia nervosa in an outpatient eating-disorder unit at a public hospital. *J Eat Disord*. 2018;6:12.
34. Jenkins PE, Morgan C, Houlihan C. Outpatient CBT for underweight patients with eating disorders: Effectiveness within a National Health Service (NHS) Eating Disorders Service. *Behav Cogn Psychother*. 2018 Aug 2;1–13.
35. Bergh C, Södersten P. Anorexia nervosa, self-starvation and the reward of stress. *Nat Med*. 1996 Jan;2(1):21–2.
36. Wright JG, Katz JN, Losina E. Clinical trials in orthopaedics research. Part I. Cultural and practical barriers to randomized trials in orthopaedics. *J Bone Joint Surg Am* [Internet]. 2011 Mar 2 [cited 2018 May 7];93(5). Available from: <https://www.ncbi.nlm.nih.gov/pmc/articles/PMC3043780/>
37. Linardon J, Hindle A, Brennan L. Dropout from cognitive-behavioral therapy for eating disorders: A meta-analysis of randomized, controlled trials. *Int J Eat Disord*. 2018 Mar 1;
38. Berends T, Boonstra N, van Elburg A. Relapse in anorexia nervosa: a systematic review and meta-analysis. *Curr Opin Psychiatry*. 2018 Aug 13;
39. Pocock SJ. *Clinical Trials: A Practical Approach*. First. Chichester West Sussex ; New York: Wiley; 1984. 278 p.
40. van Elburg AA, Hillebrand JJG, Huyser C, Snoek M, Kas MJH, Hoek HW, et al. Mandometer treatment not superior to treatment as usual for anorexia nervosa. *Int J Eat Disord*. 2012 Mar 1;45(2):193–201.
41. Poulsen S, Lunn S, Daniel SIF, Folke S, Mathiesen BB, Katznelson H, et al. A randomized controlled trial of psychoanalytic psychotherapy or cognitive-behavioral therapy for bulimia nervosa. *Am J Psychiatry*. 2014 Jan;171(1):109–16.
42. Södersten P, Bergh C, Leon M, Zandian M. Dopamine and anorexia nervosa. *Neurosci Biobehav Rev*. 2016 Jan;60:26–30.

- 1
- 2
- 3 43. Fairburn CG. *Cognitive Behavior Therapy and Eating Disorders*. New York: The Guilford Press; 2008.
- 4
- 5
- 6 44. Hollon SD, Wilson GT. Psychoanalysis or cognitive-behavioral therapy for bulimia nervosa: the specificity of psychological treatments. *Am J Psychiatry*. 2014 Jan;171(1):13–6.
- 7
- 8
- 9
- 10 45. Lampard AM, Sharbanee JM. The cognitive-behavioural theory and treatment of bulimia nervosa: An examination of treatment mechanisms and future directions. *Aust Psychol*. 2015 Feb 1;50(1):6–13.
- 11
- 12
- 13
- 14 46. Troscianko ET. CBT for eating disorders: A not-yet-success story [Internet]. [cited 2018 May 8]. Available from: <https://www.psychologytoday.com/us/experts/emily-troscianko>
- 15
- 16
- 17 47. Gutiérrez E, Carrera O. Anorexia nervosa treatments and Occam’s razor. *Psychol Med*. 2018 Jan 25;1–2.
- 18
- 19
- 20 48. Christensen H, Mackinnon AJ. Review: computerised CBT improves adult depression in the short-term, but its effect may have been overestimated previously. *Evid Based Ment Health*. 2013 Nov;16(4):119.
- 21
- 22
- 23
- 24 49. Steinert C, Munder T, Rabung S, Hoyer J, Leichsenring F. Psychodynamic therapy: As efficacious as other empirically supported treatments? A meta-analysis testing equivalence of outcomes. *Am J Psychiatry*. 2017 01;174(10):943–53.
- 25
- 26
- 27
- 28 50. Lewandowsky S, Ecker UKH, Seifert CM, Schwarz N, Cook J. Misinformation and its correction: Continued influence and successful debiasing. *Psychol Sci Public Interest J Am Psychol Soc*. 2012 Dec;13(3):106–31.
- 29
- 30
- 31
- 32 51. Fazio LK, Brashier NM, Payne BK, Marsh EJ. Knowledge does not protect against illusory truth. *J Exp Psychol Gen*. 2015 Oct;144(5):993–1002.
- 33
- 34
- 35
- 36
- 37
- 38
- 39
- 40
- 41
- 42
- 43
- 44
- 45
- 46
- 47
- 48
- 49
- 50
- 51
- 52
- 53
- 54
- 55
- 56
- 57
- 58
- 59
- 60

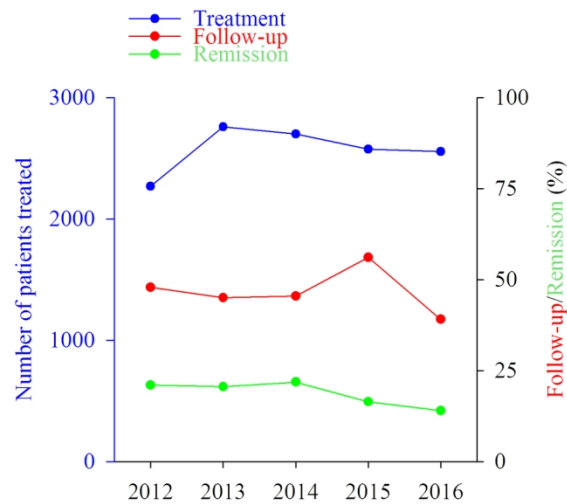

Figure 1. Number of patients treated at all clinics in Sweden and proportion of patients followed-up and in remission one year later. The year on the x-axis indicates the year of follow-up, the corresponding number of patients starting their treatment the year before.

127x180mm (300 x 300 DPI)

1  
2  
3  
4  
5  
6  
7  
8  
9  
10  
11  
12  
13  
14  
15  
16  
17  
18  
19  
20  
21  
22  
23  
24  
25  
26  
27  
28  
29  
30  
31  
32  
33  
34  
35  
36  
37  
38  
39  
40  
41  
42  
43  
44  
45  
46  
47  
48  
49  
50  
51  
52  
53  
54  
55  
56  
57  
58  
59  
60

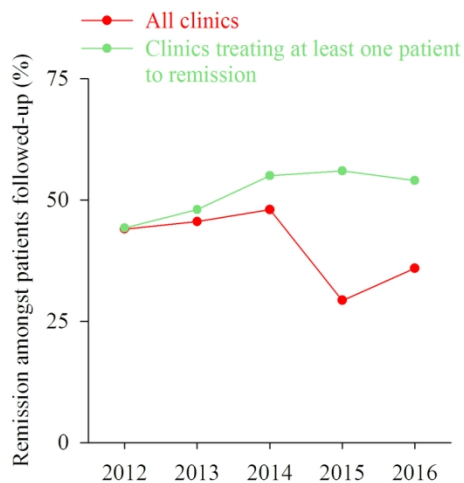

Figure 2. Proportion of patients in remission at all clinics that followed-up their patients and at clinics that treated at least one patient to remission.

127x180mm (300 x 300 DPI)

1  
2  
3  
4  
5  
6  
7  
8  
9  
10  
11  
12  
13  
14  
15  
16  
17  
18  
19  
20  
21  
22  
23  
24  
25  
26  
27  
28  
29  
30  
31  
32  
33  
34  
35  
36  
37  
38  
39  
40  
41  
42  
43  
44  
45  
46  
47  
48  
49  
50  
51  
52  
53  
54  
55  
56  
57  
58  
59  
60

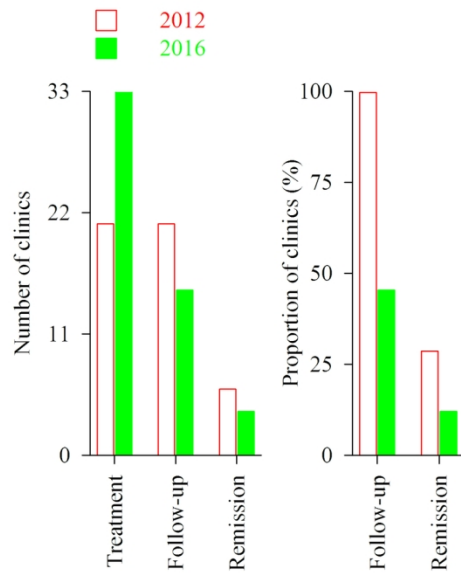

Figure 3. Number of clinics that treated, followed-up, and treated at least 20 patients to remission and proportion of clinics that followed-up and treated at least 20 patients to remission in 2012 and 2016.

127x180mm (300 x 300 DPI)

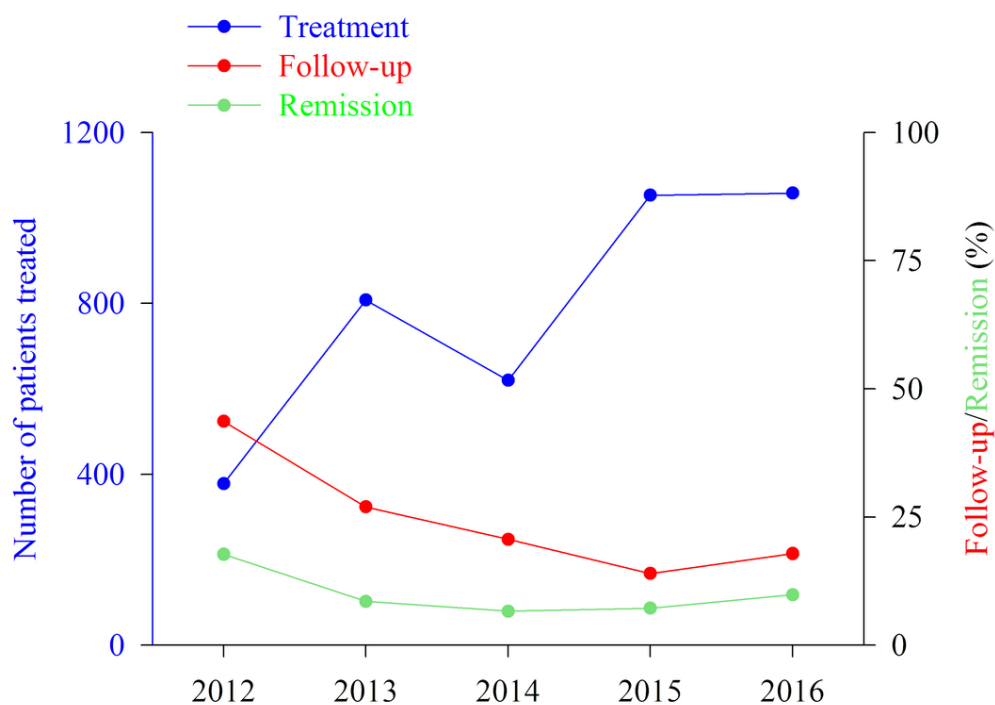

Figure 4. Number of patients treated at clinics that followed-up fewer than 10 patients (2013-2016) or 20 patients (2012) and proportion of patients followed-up and in remission one year later. The year on the x-axis indicates the year of follow-up, the corresponding number of patients starting their treatment the year before.

89x66mm (300 x 300 DPI)



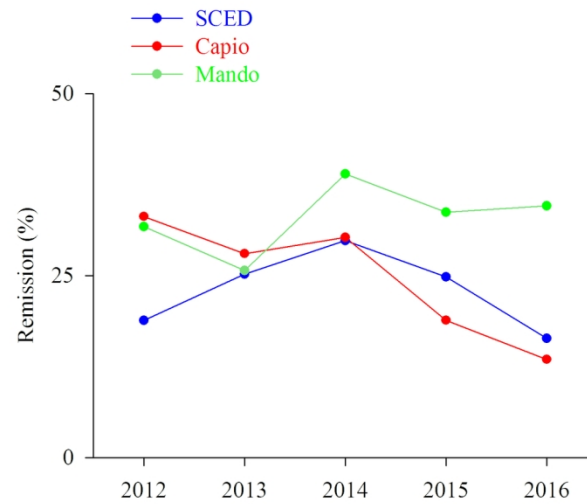

Figure 5. Proportion of patients treated to remission at the three clinics that treated more patients to remission than any other clinic, the Stockholm Centre for Eating Disorders (SCED), the Capiro Centre for Eating Disorders (Capiro), and the Mandometer Clinic in Stockholm (Mando).

127x180mm (300 x 300 DPI)

**Supplementary table.**

Number of patients treated (Treat), followed-up (F-up), and in remission at follow-up (Rem) at eating disorders clinics in Sweden in 2012-2016. The three clinics in the Stockholm County Council are the Stockholm Centre for Eating Disorders (SCED, A01), Caphio Centre for Eating Disorders (Caphio, A04), and the Mandometer Clinic (Mando (B01). Other is the combination of all clinics that followed-up fewer than 20 patients in 2012-2013 and fewer than 10 patients in 2014-2016.

Whilst most of the cells can be filled in, it is not possible to fill in all cells, because of the procedures of follow-up. The clinics are arranged from the maximal-minimal number of patients treated.

| <b>2012</b>   |              |             |            | <b>2013</b>   |              |             |            | <b>2014</b>   |              |             |            |
|---------------|--------------|-------------|------------|---------------|--------------|-------------|------------|---------------|--------------|-------------|------------|
| <b>Clinic</b> | <b>Treat</b> | <b>F-up</b> | <b>Rem</b> | <b>Clinic</b> | <b>Treat</b> | <b>F-up</b> | <b>Rem</b> | <b>Clinic</b> | <b>Treat</b> | <b>F-up</b> | <b>Rem</b> |
| <b>A01</b>    | 696          | 224         | 131        | <b>A01</b>    | 710          | 305         | 179        | <b>A01</b>    | 705          | 339         | 210        |
| <b>A04</b>    | 157          | 93          | 52         | <b>A04</b>    | 176          | 88          | 49         | <b>A04</b>    | 162          | 77          | 49         |
| <b>B01</b>    | 123          | 53          | 39         | <b>B01</b>    | 168          | 54          | 43         | <b>B01</b>    | 136          | 59          | 53         |
| <b>T01</b>    | 120          | 50          | 21         | <b>T01</b>    | 116          | 39          | 20         | <b>M10</b>    | 105          | 36          | 20         |
| <b>M10</b>    | 107          | 38          | 22         | <b>M10</b>    | 111          | 36          | 22         | <b>T01</b>    | 99           | 46          | 21         |
| <b>U02</b>    | 90           | 23          | 9          | <b>O09</b>    | 89           | 36          | 19         | <b>X02</b>    | 85           | 40          | 22         |
| <b>O09</b>    | 78           | 38          | 16         | <b>E12</b>    | 83           | 41          | 28         | <b>H01</b>    | 82           | 36          | 15         |
| <b>E12</b>    | 66           | 25          | 14         | <b>Å04</b>    | 63           | 35          | 21         | <b>U02</b>    | 78           | 16          | 6          |
| <b>N05</b>    | 49           | 26          | 11         | <b>H01</b>    | 59           | 43          | 18         | <b>E12</b>    | 72           | 38          | 23         |
| <b>R01</b>    | 48           | 33          | 13         | <b>N02</b>    | 58           | 30          | 7          | <b>N07</b>    | 66           | 16          | 3          |
| <b>H01</b>    | 44           | 44          | 12         | <b>O07</b>    | 56           | 35          | 4          | <b>S02</b>    | 63           | 1           | 0          |
| <b>D03</b>    | 40           | 38          | 7          | <b>O03</b>    | 44           | 44          | 6          | <b>O09</b>    | 57           | 27          | 15         |
| <b>K08</b>    | 36           | 24          | 12         | <b>M12</b>    | 42           | 41          | 10         | <b>N02</b>    | 55           | 32          | 15         |
| <b>O03</b>    | 36           | 33          | 8          | <b>N05</b>    | 39           | 26          | 3          | <b>C04</b>    | 52           | 0           | 0          |
| <b>Å04</b>    | 33           | 21          | 7          | <b>N07</b>    | 39           | 21          | 1          | <b>O03</b>    | 52           | 30          | 5          |
| <b>O07</b>    | 31           | 31          | 5          | <b>C03</b>    | 38           | 30          | 13         | <b>W11</b>    | 49           | 11          | 0          |
| <b>W01</b>    | 30           | 28          | 20         | <b>P04</b>    | 33           | 32          | 9          | <b>O07</b>    | 43           | 16          | 2          |
| <b>N02</b>    | 29           | 28          | 1          | <b>W01</b>    | 28           | 28          | 9          | <b>N05</b>    | 40           | 16          | 8          |
| <b>N07</b>    | 29           | 22          | 2          | <b>D03</b>    |              | 12          | 3          | <b>C03</b>    | 39           | 17          | 5          |
| <b>P04</b>    | 26           | 26          | 0          | <b>K08</b>    |              | 13          | 9          | <b>M52</b>    | 39           | 20          | 11         |
| <b>C03</b>    | 21           | 21          | 8          | <b>U02</b>    |              | 12          | 5          | <b>P04</b>    | 37           | 15          | 0          |
| <b>Other</b>  | 378          | 165         | 67         | <b>Z02</b>    |              | 13          | 8          | <b>Å02</b>    | 33           | 27          | 14         |
|               |              |             |            | <b>Å02</b>    |              | 11          | 10         | <b>D03</b>    | 31           | 11          | 0          |
| <b>Sum</b>    | <b>2267</b>  | <b>1084</b> | <b>477</b> | <b>Other</b>  | 806          | 218         | 69         | <b>M03</b>    | 30           | 7           | 0          |
|               |              |             |            |               |              |             |            | <b>Å04</b>    | 30           | 19          | 14         |
|               |              |             |            | <b>Sum</b>    | <b>2758</b>  | <b>1243</b> | <b>566</b> | <b>R01</b>    | 29           | 4           | 0          |
|               |              |             |            |               |              |             |            | <b>Y06</b>    | 29           | 0           | 0          |
|               |              |             |            |               |              |             |            | <b>M12</b>    | 26           | 15          | 7          |
|               |              |             |            |               |              |             |            | <b>W04</b>    | 26           | 8           | 0          |
|               |              |             |            |               |              |             |            | <b>K08</b>    | 25           | 13          | 9          |
|               |              |             |            |               |              |             |            | <b>W01</b>    | 24           | 9           | 0          |
|               |              |             |            |               |              |             |            | <b>B03</b>    | 20           | 4           | 0          |
|               |              |             |            |               |              |             |            | <b>B05</b>    | 19           | 1           | 0          |
|               |              |             |            |               |              |             |            | <b>Z02</b>    | 19           | 10          | 10         |
|               |              |             |            |               |              |             |            | <b>Å12</b>    | 19           | 4           | 0          |
|               |              |             |            |               |              |             |            | <b>D08</b>    | 18           | 10          | 8          |
|               |              |             |            |               |              |             |            | <b>F01</b>    | 17           | 10          | 0          |
|               |              |             |            |               |              |             |            | <b>Y05</b>    | 16           | 3           | 0          |
|               |              |             |            |               |              |             |            | <b>O66</b>    | 15           | 6           | 0          |

|    |  |              |             |             |            |
|----|--|--------------|-------------|-------------|------------|
| 1  |  |              |             |             |            |
| 2  |  | <b>E08</b>   | 13          | 6           | 0          |
| 3  |  | <b>F02</b>   | 13          | 12          | 3          |
| 4  |  | <b>M28</b>   | 13          | 7           | 0          |
| 5  |  | <b>Å06</b>   | 11          | 2           | 0          |
| 6  |  | <b>E09</b>   | 9           | 2           | 0          |
| 7  |  | <b>I05</b>   | 9           | 0           | 0          |
| 8  |  | <b>Y08</b>   | 9           | 1           | 0          |
| 9  |  | <b>D14</b>   | 8           | 0           | 0          |
| 10 |  | <b>Z05</b>   | 8           | 0           | 0          |
| 11 |  | <b>G03</b>   | 7           | 5           | 0          |
| 12 |  | <b>E06</b>   | 6           | 0           | 0          |
| 13 |  | <b>E17</b>   | 6           | 4           | 0          |
| 14 |  | <b>D06</b>   | 5           | 0           | 0          |
| 15 |  | <b>I01</b>   | 5           | 0           | 0          |
| 16 |  | <b>Å11</b>   | 5           | 3           | 0          |
| 17 |  | <b>F04</b>   | 4           | 2           | 0          |
| 18 |  | <b>F10</b>   | 4           | 0           | 0          |
| 19 |  | <b>E11</b>   | 3           | 0           | 0          |
| 20 |  | <b>E25</b>   | 3           | 2           | 0          |
| 21 |  | <b>O46</b>   | 3           | 3           | 0          |
| 22 |  | <b>E22</b>   | 2           | 1           | 0          |
| 23 |  | <b>O01</b>   | 2           | 0           | 0          |
| 24 |  | <b>B10</b>   | 1           | 0           | 0          |
| 25 |  | <b>F07</b>   | 1           | 0           | 0          |
| 26 |  | <b>F08</b>   | 1           | 0           | 0          |
| 27 |  | <b>K09</b>   | 1           | 0           | 0          |
| 28 |  | <b>O67</b>   | 1           | 0           | 0          |
| 29 |  | <b>W13</b>   | 1           | 0           | 0          |
| 30 |  | <b>Y07</b>   | 1           | 0           | 0          |
| 31 |  | <b>Y10</b>   | 1           | 0           | 0          |
| 32 |  | <b>Y11</b>   | 1           | 0           | 0          |
| 33 |  | <b>I01</b>   | 0           | 0           | 0          |
| 34 |  | <b>M37</b>   | 0           | 0           | 0          |
| 35 |  | <b>M57</b>   | 0           | 0           | 0          |
| 36 |  | <b>O27</b>   | 0           | 0           | 0          |
| 37 |  | <b>O31</b>   | 0           | 0           | 0          |
| 38 |  | <b>O35</b>   | 0           | 0           | 0          |
| 39 |  | <b>O36</b>   | 0           | 0           | 0          |
| 40 |  | <b>O37</b>   | 0           | 0           | 0          |
| 41 |  | <b>O50</b>   | 0           | 0           | 0          |
| 42 |  | <b>O72</b>   | 0           | 0           | 0          |
| 43 |  | <b>Other</b> |             | 128         | 41         |
| 44 |  | <b>Sum</b>   | <b>2699</b> | <b>1098</b> | <b>548</b> |
| 45 |  |              |             |             |            |
| 46 |  |              |             |             |            |
| 47 |  |              |             |             |            |
| 48 |  |              |             |             |            |
| 49 |  |              |             |             |            |
| 50 |  |              |             |             |            |
| 51 |  |              |             |             |            |
| 52 |  |              |             |             |            |
| 53 |  |              |             |             |            |
| 54 |  |              |             |             |            |
| 55 |  |              |             |             |            |
| 56 |  |              |             |             |            |
| 57 |  |              |             |             |            |
| 58 |  |              |             |             |            |
| 59 |  |              |             |             |            |
| 60 |  |              |             |             |            |

**2015**

| <b>Clinic</b> | <b>Treat</b> | <b>F-up</b> | <b>Rem</b> |
|---------------|--------------|-------------|------------|
| <b>A01</b>    | 734          | 505         | 182        |
| <b>A04</b>    | 175          | 113         | 33         |
| <b>O09</b>    | 109          | 13          | 0          |
| <b>T01</b>    | 106          | 36          | 0          |
| <b>B01</b>    | 95           | 79          | 32         |
| <b>M10</b>    | 95           | 42          | 15         |
| <b>H01</b>    | 93           | 51          | 4          |
| <b>X02</b>    | 83           | 7           | 0          |
| <b>S02</b>    | 73           | 37          | 0          |
| <b>U02</b>    | 73           | 14          | 0          |
| <b>N07</b>    | 71           | 20          | 0          |
| <b>E12</b>    | 59           | 49          | 20         |
| <b>N02</b>    | 47           | 41          | 6          |
| <b>N05</b>    | 45           | 5           | 0          |
| <b>M52</b>    | 40           | 7           | 3          |
| <b>C04</b>    | 36           | 0           | 0          |
| <b>O07</b>    | 35           | 31          | 3          |
| <b>M03</b>    | 34           | 5           | 0          |
| <b>Å04</b>    | 34           | 14          | 7          |
| <b>D03</b>    | 31           | 18          | 0          |
| <b>M12</b>    | 31           | 9           | 0          |
| <b>O03</b>    | 29           | 21          | 10         |
| <b>C03</b>    | 26           | 13          | 11         |
| <b>Z02</b>    | 26           | 13          | 9          |
| <b>M57</b>    | 25           | 0           | 0          |
| <b>K08</b>    | 23           | 16          | 0          |
| <b>B03</b>    | 22           | 14          | 0          |
| <b>Å02</b>    | 22           | 11          | 0          |
| <b>E08</b>    | 18           | 10          | 0          |
| <b>O27</b>    | 17           | 17          | 7          |
| <b>P04</b>    | 17           | 0           | 0          |
| <b>W01</b>    | 17           | 17          | 5          |
| <b>Y06</b>    | 15           | 7           | 0          |
| <b>D08</b>    | 14           | 2           | 0          |
| <b>G03</b>    | 14           | 6           | 0          |
| <b>I05</b>    | 13           | 0           | 0          |
| <b>O66</b>    | 13           | 13          | 0          |
| <b>R01</b>    | 13           | 6           | 0          |
| <b>Y05</b>    | 13           | 2           | 0          |

**2016**

| <b>Clinic</b> | <b>Treat</b> | <b>F-up</b> | <b>Rem</b> |
|---------------|--------------|-------------|------------|
| A01           | 715          | 298         | 117        |
| A04           | 178          | 95          | 24         |
| T01           | 98           | 20          | 0          |
| O09           | 85           | 40          | 0          |
| X02           | 82           | 49          | 0          |
| B01           | 81           | 43          | 28         |
| O27           | 80           | 52          | 7          |
| H01           | 77           | 23          | 6          |
| M10           | 75           | 17          | 6          |
| E12           | 67           | 35          | 7          |
| C03           | 64           | 30          | 20         |
| N07           | 64           | 1           | 0          |
| U02           | 63           | 0           | 0          |
| C04           | 49           | 0           | 0          |
| O07           | 49           | 28          | 5          |
| W11           | 44           | 2           | 0          |
| N02           | 40           | 13          | 0          |
| M52           | 36           | 34          | 0          |
| N05           | 35           | 26          | 0          |
| O03           | 35           | 24          | 8          |
| S02           | 32           | 7           | 0          |
| W01           | 31           | 29          | 11         |
| Y06           | 31           | 5           | 0          |
| Å04           | 30           | 12          | 10         |
| M03           | 26           | 1           | 0          |
| B03           | 23           | 1           | 0          |
| D03           | 23           | 15          | 0          |
| K08           | 23           | 13          | 0          |
| L01           | 21           | 0           | 0          |
| M37           | 21           | 1           | 0          |
| Z02           | 21           | 6           | 0          |
| E17           | 20           | 12          | 0          |
| Å12           | 20           | 1           | 0          |
| M28           | 19           | 7           | 0          |
| R01           | 19           | 5           | 0          |
| Å02           | 19           | 5           | 0          |
| W04           | 17           | 6           | 0          |
| O66           | 15           | 15          | 5          |
| Y05           | 15           | 2           | 0          |

|    |              |             |             |            |              |             |            |            |
|----|--------------|-------------|-------------|------------|--------------|-------------|------------|------------|
| 1  |              |             |             |            |              |             |            |            |
| 2  | <b>D14</b>   | 12          | 0           | 0          | <b>F01</b>   | 13          | 0          | 0          |
| 3  | <b>W11</b>   | 12          | 0           | 0          | <b>E09</b>   | 11          | 0          | 0          |
| 4  | <b>E17</b>   | 10          | 6           | 0          | <b>M12</b>   | 10          | 3          | 0          |
| 5  | <b>W04</b>   | 10          | 4           | 0          | <b>O72</b>   | 9           | 1          | 0          |
| 6  | <b>Å06</b>   | 10          | 8           | 0          | <b>B05</b>   | 7           | 3          | 0          |
| 7  | <b>Å12</b>   | 10          | 2           | 0          | <b>E08</b>   | 7           | 3          | 0          |
| 8  | <b>E09</b>   | 9           | 1           | 0          | <b>I05</b>   | 7           | 0          | 0          |
| 9  | <b>B05</b>   | 7           | 2           | 0          | <b>G03</b>   | 6           | 2          | 0          |
| 10 | <b>L01</b>   | 7           | 0           | 0          | <b>Z05</b>   | 6           | 0          | 0          |
| 11 | <b>M28</b>   | 7           | 1           | 0          | <b>Å06</b>   | 6           | 4          | 0          |
| 12 | <b>Y08</b>   | 6           | 1           | 0          | <b>D08</b>   | 5           | 4          | 0          |
| 13 | <b>E06</b>   | 5           | 0           | 0          | <b>E06</b>   | 5           | 0          | 0          |
| 14 | <b>F02</b>   | 5           | 0           | 0          | <b>I02</b>   | 5           | 2          | 0          |
| 15 | <b>Å11</b>   | 5           | 0           | 0          | <b>M57</b>   | 5           | 0          | 0          |
| 16 | <b>I02</b>   | 4           | 1           | 0          | <b>Y08</b>   | 3           | 1          | 0          |
| 17 | <b>M37</b>   | 4           | 4           | 0          | <b>F04</b>   | 2           | 2          | 0          |
| 18 | <b>O72</b>   | 4           | 1           | 0          | <b>O71</b>   | 2           | 0          | 0          |
| 19 | <b>D06</b>   | 2           | 0           | 0          | <b>E22</b>   | 1           | 0          | 0          |
| 20 | <b>F01</b>   | 2           | 2           | 0          | <b>Y11</b>   | 1           | 0          | 0          |
| 21 | <b>F10</b>   | 2           | 0           | 0          | <b>Å11</b>   | 1           | 0          | 0          |
| 22 | <b>Y11</b>   | 2           | 0           | 0          | <b>B10</b>   | 0           | 0          | 0          |
| 23 | <b>B10</b>   | 1           | 0           | 0          | <b>D06</b>   | 0           | 0          | 0          |
| 24 | <b>E25</b>   | 1           | 0           | 0          | <b>D14</b>   | 0           | 0          | 0          |
| 25 | <b>F04</b>   | 1           | 0           | 0          | <b>E25</b>   | 0           | 0          | 0          |
| 26 | <b>Z05</b>   | 1           | 0           | 0          | <b>F02</b>   | 0           | 0          | 0          |
| 27 | <b>E11</b>   | 0           | 0           | 0          | <b>F10</b>   | 0           | 0          | 0          |
| 28 | <b>E22</b>   | 0           | 0           | 0          | <b>P04</b>   | 0           | 0          | 0          |
| 29 | <b>F07</b>   | 0           | 0           | 0          | <b>E11</b>   | 0           | 0          | 0          |
| 30 | <b>F08</b>   | 0           | 0           | 0          | <b>F07</b>   | 0           | 0          | 0          |
| 31 | <b>K09</b>   | 0           | 0           | 0          | <b>F08</b>   | 0           | 0          | 0          |
| 32 | <b>O01</b>   | 0           | 0           | 0          | <b>K09</b>   | 0           | 0          | 0          |
| 33 | <b>O46</b>   | 0           | 0           | 0          | <b>O01</b>   | 0           | 0          | 0          |
| 34 | <b>O67</b>   | 0           | 0           | 0          | <b>O46</b>   | 0           | 0          | 0          |
| 35 | <b>O71</b>   | 0           | 0           | 0          | <b>O67</b>   | 0           | 0          | 0          |
| 36 | <b>W13</b>   | 0           | 0           | 0          | <b>W13</b>   | 0           | 0          | 0          |
| 37 | <b>Y07</b>   | 0           | 0           | 0          | <b>Y07</b>   | 0           | 0          | 0          |
| 38 | <b>Y10</b>   | 0           | 0           | 0          | <b>Y10</b>   | 0           | 0          | 0          |
| 39 | <b>Other</b> |             | 147         | 76         | <b>Other</b> |             |            | 104        |
| 40 |              |             |             |            |              |             |            |            |
| 41 | <b>Sum</b>   | <b>2575</b> | <b>1444</b> | <b>423</b> | <b>Sum</b>   | <b>2555</b> | <b>998</b> | <b>358</b> |
| 42 |              |             |             |            |              |             |            |            |
| 43 |              |             |             |            |              |             |            |            |
| 44 |              |             |             |            |              |             |            |            |
| 45 |              |             |             |            |              |             |            |            |
| 46 |              |             |             |            |              |             |            |            |
| 47 |              |             |             |            |              |             |            |            |
| 48 |              |             |             |            |              |             |            |            |
| 49 |              |             |             |            |              |             |            |            |
| 50 |              |             |             |            |              |             |            |            |
| 51 |              |             |             |            |              |             |            |            |
| 52 |              |             |             |            |              |             |            |            |
| 53 |              |             |             |            |              |             |            |            |
| 54 |              |             |             |            |              |             |            |            |
| 55 |              |             |             |            |              |             |            |            |
| 56 |              |             |             |            |              |             |            |            |
| 57 |              |             |             |            |              |             |            |            |
| 58 |              |             |             |            |              |             |            |            |
| 59 |              |             |             |            |              |             |            |            |
| 60 |              |             |             |            |              |             |            |            |

# BMJ Open

## Treatment Outcomes for Eating Disorders in Sweden, 2012-2016 "Data from the National Quality Registry"

|                                 |                                                                                                                                                                                                      |
|---------------------------------|------------------------------------------------------------------------------------------------------------------------------------------------------------------------------------------------------|
| Journal:                        | <i>BMJ Open</i>                                                                                                                                                                                      |
| Manuscript ID                   | bmjopen-2018-024179.R2                                                                                                                                                                               |
| Article Type:                   | Research                                                                                                                                                                                             |
| Date Submitted by the Author:   | 16-Oct-2018                                                                                                                                                                                          |
| Complete List of Authors:       | Södersten, Per; Karolinska Institutet<br>Brodin, Ulf; Karolinska Institutet,<br>Sjöberg, Jennie; Mandometer Clinic<br>Zandian, Modjtaba; Karolinska Institutet<br>Bergh, Cecilia; Mandometer Clinic, |
| <b>Primary Subject Heading</b>: | Public health                                                                                                                                                                                        |
| Secondary Subject Heading:      | Health policy                                                                                                                                                                                        |
| Keywords:                       | Health policy < HEALTH SERVICES ADMINISTRATION & MANAGEMENT, PUBLIC HEALTH, STATISTICS & RESEARCH METHODS                                                                                            |
|                                 |                                                                                                                                                                                                      |

SCHOLARONE™  
Manuscripts

## Treatment Outcomes for Eating Disorders in Sweden, 2012-2016

### “Data from the National Quality Registry”

Per Södersten, Ulf Brodin, Jennie Sjöberg, Modjtaba Zandian, Cecilia Bergh

Department of Neurobiology, Care Sciences and Society, Karolinska Institutet, Mandometer

Clinic, Novum, S-141 04 Huddinge, Sweden

Per Södersten professor em. Email: [per.sodersten@ki.se](mailto:per.sodersten@ki.se)

Ulf Brodin PhD medical statistician em. Email: [ulf.brodin@ki.se](mailto:ulf.brodin@ki.se)

Jennie Sjöberg RN clinical director. Email: [jennie.sjoberg@mando.se](mailto:jennie.sjoberg@mando.se)

Modjtaba Zandian PhD quality controller. Email: [modjtaba.zandin@ki.se](mailto:modjtaba.zandin@ki.se)

Cecilia Bergh PhD clinical director. Email: [cecilia.bergh@mando.se](mailto:cecilia.bergh@mando.se)

4367 words excluding abstract, strengths and limitations, references, acknowledgements, and

figure legends

52 references

5 figures

2 tables

1  
2  
3  
4  
5  
6  
7 Correspondence to: Per Södersten per.sodersten@ki.se  
8  
9  
10  
11  
12  
13  
14  
15  
16  
17  
18  
19  
20  
21  
22  
23  
24  
25  
26  
27  
28  
29  
30  
31  
32  
33  
34  
35  
36  
37  
38  
39  
40  
41  
42  
43  
44  
45  
46  
47  
48  
49  
50  
51  
52  
53  
54  
55  
56  
57  
58  
59  
60

For peer review only



## Abstract

**Objective** To report the outcomes of eating disorders treatment in Sweden in 2012-2016.

**Design** The number of patients treated and the number of patients not fulfilling an eating disorders diagnosis (remission) at one year of follow-up at the clinics listed in the National Quality Registry for Eating Disorders Treatment were analyzed. The published outcomes at three clinics, that used survival analysis to estimate outcomes, were compared with their outcomes in the registry. Outcomes at the three biggest clinics were compared.

**Setting** All eating disorders clinics.

**Participants** All patients treated at eating disorders clinics.

**Intervention** Cognitive behavioural therapy at most clinics and normalization of eating behaviour at the three clinics with published outcomes.

**Outcome measure** Proportion of patients in remission.

**Results** About 2600 patients were treated annually, fewer than half were followed-up, and remission rates decreased from 21% in 2014 to 14% in 2016. Outcomes, which differed amongst clinics and within clinics over time, have been publically overestimated by excluding patients lost to follow-up. The published estimated rate of remission at three clinics that treated 1200 patients in 1993-2011 was 27, 28, and 40% at one year of follow-up. The average rate of remission over the three last years at the biggest of these clinics was 36%, but decreased from 29 and 30% to 16 and 14% at the two other of the biggest clinics.

1  
2  
3 **Conclusions** With more than half the patients lost to follow-up and no data on relapse in the  
4  
5 National Quality Registry, it is difficult to estimate the effects of eating disorders treatment in  
6  
7 Sweden. Analysis of time to clinically significant events, including an extended period of follow-  
8  
9 up, has improved the quality of the estimates at three clinics. Overestimation of remission rates  
10  
11 has misled health care policies. The effect of eating disorders treatment has also been  
12  
13 overestimated internationally.  
14  
15  
16  
17  
18  
19  
20  
21  
22  
23  
24  
25  
26  
27  
28  
29  
30  
31  
32  
33  
34  
35  
36  
37  
38  
39  
40  
41  
42  
43  
44  
45  
46  
47  
48  
49  
50  
51  
52  
53  
54  
55  
56  
57  
58  
59  
60

### Strengths and limitations of this study

- This study has the strength of analyzing all patients treated, followed-up, and treated to remission at all eating disorders clinics over five years in Sweden.
- These outcomes are available in the National Quality Registry for Eating Disorders Treatment but have not been published in the scientific literature.
- Three clinics have published outcomes at three-month intervals making it possible to compare these outcomes with their outcomes in the registry.
- The study has the strength of showing that a time-to-event analysis improves compliance, facilitating estimation of outcomes.
- It is a limitation that whereas outcomes in the registry covered the years 2012-2016, the published outcomes at the three clinics covered the years 1993-2011.

## INTRODUCTION

The National Quality Registries in Sweden have been developed starting in the 1970s and today there are about 100 registries, covering virtually all kinds of disease (1). The Swedish Association of Local Authorities and Regions (SALAR) and the Swedish Government recently agreed to strengthen the registries financially, pointing to their key role in the development of all aspects of health care, improving the quality of care, facilitating research, including international comparisons of outcomes, guiding health care policies, and making it possible for anyone to compare the outcomes of treatment at individual clinics (1,2). Indeed, the SALAR has a website for such comparisons (3).

The Swedish National Quality Registry for Eating Disorders Treatment, Riksät, was established in 1999 and has published 11 reports, written in Swedish, in 2001-2016 (4). Following the aims of the registries, the objective of Riksät is to “document the outcome of treatment” (quote from the first report in 2001). Thus, the important measures are the number of patients treated and the number of patients in remission at follow-up. These numbers are listed in Riksät but have not been analyzed and reported in the scientific literature. The first aim of the present study is to examine the rate of remission at all eating disorders clinics in Sweden.

The results in Riksät have been publicized nationally as demonstrating increasing rates of remission over the years to 56% in 2015 and that “70% of the patients are ‘cured’ within one year” (4,5). Because these outcomes are better than the outcomes reported in the scientific literature (6,7), the second aim of this study is to examine their evidence basis.

There are three clinics in Sweden, that have published outcomes (8). Because these clinics (Mandometer Clinics) also report to Riksät it is possible to compare their published outcomes

1  
2  
3 with their outcomes in Riksät. The biggest of the three Mandometer clinics is the clinic in the  
4  
5 County Council of Stockholm (Mando). The third aim of this study is to compare the outcomes at  
6  
7 Mando with the outcomes at the two other of the biggest clinics in Sweden, the Stockholm Centre  
8  
9 for Eating Disorders (SCED) and the Capio Centre for Eating Disorders (Capio).  
10  
11  
12

13 The fourth aim of this study is to call the attention of policy makers to the fact that  
14  
15 outcomes of eating disorders treatment have been overestimated not only in Sweden but in other  
16  
17 countries as well.  
18  
19  
20

## 21 **METHODS**

### 22 **Patients and diagnostic procedures**

23  
24  
25 Riksät lists the number of patients entering treatment each year and the number of patients  
26  
27 followed-up one year later, although the exact time of follow-up is not mentioned. More than  
28  
29 90% of the patients entering treatment at the specialist clinics are listed in the registry, but  
30  
31 patients that are treated at general psychiatric units may not be listed. Whilst there is no  
32  
33 information on how many these patients might be, most patients treated are listed in the registry.  
34  
35  
36 There is no information on long term outcome, including relapse.  
37  
38  
39  
40  
41  
42

43 At the beginning of treatment and at follow-up the patients completed the Eating Disorders  
44  
45 Examination Questionnaire (EDE-Q), which measures eating disorders symptoms (9), and the  
46  
47 Clinical Impairment Assessment (CIA), which measures psychosocial functioning as a  
48  
49 consequence of the eating disorder (10). The EDE-Q was used for patients older than 10 years  
50  
51 and the CIA was used for patients older than 18 years. A semistructured interview was used for  
52  
53 children and adults to determine overall psychiatric symptoms and social functioning (see e.g.,  
54  
55  
56  
57  
58  
59  
60

1  
2  
3 (11)). Using these procedures, the patients were diagnosed with Anorexia Nervosa, Bulimia  
4 Nervosa, Eating Disorder Not Otherwise Specified, or Binge Eating Disorder relying on the  
5 criteria in the Diagnostic and Statistical Manual of Mental Disorders (DSM-IV) (12). Patients  
6 who no longer fulfilled the diagnostic criteria for an eating disorder were listed as in remission.  
7  
8 About 4-5% of the patients in the yearly reports had been treated before when entering treatment.  
9  
10  
11  
12  
13

14  
15  
16 Riksät reports changes in the patients' social functioning and their experiences of the  
17 treatment, and these secondary measures improve in parallel as patients go into remission but will  
18 not be considered in this analysis.  
19  
20  
21  
22

23  
24 Whilst Riksät thus includes two time points for assessment, the Mandometer clinics have  
25 developed a treatment in which the patients are assessed at three-month intervals and followed-up  
26 1, 2, 3, 6, 9, 12, 18, 24, 36, 48, and 60 months after remission. The procedures, including the  
27 criteria for inclusion, exclusion, and remission were published in 2002 (13), and have been re-  
28 published many times (e.g., (8)); another description may be redundant. The Mandometer clinics  
29 also report their outcomes to Riksät.  
30  
31  
32  
33  
34  
35  
36  
37

### 38 39 **Treatments**

40  
41  
42 The 2012-2014 Riksät reports did not specify the treatments used beyond mentioning that these  
43 were guided by “the principles of cognitive behavioural therapy” (CBT) and that they could be  
44 used with individual patients or with groups of patients. Medical intervention was used for  
45 monitoring and restoring physical health and psychopharmacology was also used, absence of  
46 evidence of their efficiency was pointed out. The 2015-2016 reports provide details on  
47 treatments. Thus, CBT was used with on average 52% of the children and with 72% of the adults,  
48  
49 psychodynamic therapy was used with on average 21% of the children and with 24% of the  
50  
51  
52  
53  
54  
55  
56  
57  
58  
59  
60

1  
2  
3 adults, and family-based therapies were used with on average 38% of the children. The treatment  
4 developed at the Mandometer clinics was described in 1996 (14), re-published some years on  
5  
6 (8,13), and because it has since been described in several other papers, another description may  
7  
8 be redundant. Suffice it to say that an important intervention is teaching patients how to eat  
9  
10 normally using real time visual feedback on how much food to eat and how quickly to eat it. A  
11  
12 video of how this method works was published recently (15). In addition, the patients are  
13  
14 provided with warmth, that exerts an anxiolytic effect in 30 minutes (16), their physical activity  
15  
16 is reduced, and they are assisted in restarting their social interactions (13). Interestingly, re-  
17  
18 establishing normal eating behaviour is also the most important intervention in CBT, although it  
19  
20 is not clear how this is achieved (7).  
21  
22  
23  
24  
25  
26

### 27 **Description of outcomes**

28  
29  
30  
31 Initially, Riksät reported the combined outcomes at the clinics across regions in Sweden, the  
32  
33 reports published in 2009 and 2010 were incomplete, and no report was published in 2011.  
34

35  
36 However, the outcomes at individual clinics were reported in 2012-2016. The number of patients  
37  
38 treated at each clinic and the proportion of patients who were followed-up are listed in one set of  
39  
40 tables in these reports. The number and the proportion of patients in remission at follow-up are  
41  
42 listed in another set of tables. These numbers have been combined into one table (supplementary  
43  
44 table) and used in the analysis.  
45  
46  
47

### 48 **Combined outcomes at all clinics**

49  
50  
51 The numbers of patients treated, followed-up, and treated to remission have been summarized for  
52  
53 all clinics. The number of patients in remission has been related to the number of patients treated  
54  
55  
56  
57  
58  
59  
60

1  
2  
3 as well as to the number of patients followed-up in an attempt to explain the high remission rates  
4  
5 publicized in Sweden.  
6  
7

8  
9 If the treatment and the follow-up assessments are about the same at all clinics, the  
10  
11 probability for remission should be the same in all clinics. This hypothesis, which can be  
12  
13 formalized as:  $H_0: P_i(\text{Remission}) = P_0(\text{Remission})$  for all clinics,  $i=1, 2, 3, \dots, n$ , was tested using  
14  
15 a test for homogeneity of the data (17).  
16  
17

18  
19 In 2012-2013 Riksät listed the number of clinics that treated and followed-up at least 20  
20  
21 patients. The number of patients treated to remission at these clinics was listed in 2012, but in  
22  
23 2013 the number of patients treated to remission included clinics that had followed-up at least 10  
24  
25 children or 10 adult patients. In 2014-2016 the number of patients treated, followed-up, and  
26  
27 treated to remission was listed for all clinics. Using these data (supplementary table), the number  
28  
29 of clinics following-up at least 20 patients have been analyzed. Outcomes at clinics following-up  
30  
31 fewer than 10 patients have also been analyzed.  
32  
33  
34  
35

### 36 **Published outcomes at Mandometer clinics**

37

38  
39  
40 Mandometer clinics have published the outcomes of 1428 patients treated at six clinics in four  
41  
42 countries over various periods of time in 1993-2011, and these data are available in the  
43  
44 supplementary files of (8). The three Swedish clinics, in Alingsås, Danderyd, and Huddinge,  
45  
46 treated 1200 of these patients. The clinic in Huddinge, within the Stockholm County Council, is  
47  
48 the oldest clinic and is referred to as Mando in this analysis. The probability of going into  
49  
50 remission over consecutive three-month intervals up to 12 months at these clinics was estimated  
51  
52 using a life-table approach to survival analysis (18). The rate of failure amongst censored patients  
53  
54 was estimated to be 20%, yielding a conservative estimate of treatment outcomes. This analysis  
55  
56  
57  
58  
59  
60



allows comparison between these published outcomes and the outcomes for the same clinics listed in Riksät.

### Outcomes at individual clinics

Outcomes were compared amongst SCED, Capio, and Mando.

### Patient and public involvement

This study is an analysis of patient data in a registry and those patients did not participate in the analysis. The results will be openly available at mandometer.com.

## RESULTS

### Patient characteristics

The characteristics of the patients at the start of treatment were stable over all years and measures of variability are therefore not included. The average proportion of males was 4.6%, the average proportion of children and adolescents, who were <18 years old, was 29%. The age, obviously, was variable and the average mean (SD) age of all patients was 23.1 (8.9) years. The proportion of the various eating disorders diagnoses was also stable over the years and average values are presented in Table 1.

**Table 1.** Diagnoses amongst patients entering treatment for eating disorders in Sweden in 2012-2016. There were about 2600 patient each year and the proportions are averaged over these years. Children were <18 years old.

Proportion (%)

| <u>Diagnosis</u>                        | <u>Children</u> | <u>Adults</u> |
|-----------------------------------------|-----------------|---------------|
| Anorexia Nervosa                        | 39              | 20            |
| Bulimia Nervosa                         | 8               | 32            |
| Eating Disorder Not Otherwise Specified | 45              | 37            |
| Binge Eating Disorder                   | 1               | 6             |
| <u>Other*</u>                           | <u>7</u>        | <u>5</u>      |

\*Not specified.

### **Combined outcomes at all clinics**

Figure 1 shows that the total number of patients treated at all clinics increased to about 2600 in 2013, and remained relatively stable over the following years. The figure also shows that fewer than half the patients were typically followed-up a year later and that the rate of remission was about 21% in 2012-2014, and decreased to 14% in 2016. The number of patients treated to remission increased from 477 in 2012 to 589 in 2014 and decreased to 358 in 2016. There is no information on possible differences in the number of patients in remission related to the diagnosis at the start of treatment.

--- Please insert Figure 1 about here ---

Figure 2 shows firstly, that the rate of remission at all clinics that followed-up their patients was less than 50% in 2012-2014, 29% in 2015, and 36% in 2016. Secondly, the figure shows that

1  
2  
3 the rate of remission at clinics that had treated at least one patient to remission increased to 56%  
4  
5 in 2015 and decreased to 54% in 2016. The second analysis thus excluded patients followed-up at  
6  
7 clinics that did not treat a single patient to remission. The significance of these two calculations  
8  
9 of remission rates is clarified in the Discussion.  
10  
11  
12

13 --- Please insert Figure 2 about here ---  
14  
15

### 16 **Variability in outcomes**

17  
18  
19  
20 The probability of going into remission in 2012 was significantly different amongst the 17 clinics  
21  
22 that had treated patients in all recorded years ( $P < 0.001$ ;  $\text{Chi}^2 = 80.2$ ,  $\text{df} = 16$ ). The probability of  
23  
24 going into remission was also significantly different amongst the five clinics that had treated at  
25  
26 least 100 patients in 2012 ( $P < 0.001$ ;  $\text{Chi}^2 = 23.7$ ,  $\text{df} = 4$ ). Analysis of the other years gives similar  
27  
28 results.  
29  
30  
31  
32

33 Analysis of the results at SCED showed that the probability of going into remission was  
34  
35 significantly different over the years ( $P < 0.001$ ;  $\text{Chi}^2 = 46.3$ ,  $\text{df} = 4$ ). Analysis of the other clinics  
36  
37 gives similar results.  
38  
39  
40

### 41 **Combined outcomes at clinics that followed-up at least 20 patients**

42  
43  
44 Because Riksät reported on clinics that had followed-up at least 20 patients in 2012-2013 and for  
45  
46 all clinics in 2014-2016, the number of clinics reporting their outcomes was lower in 2012-2013  
47  
48 (21 and 23) than in 2014-2016 (70, 64, and 59). However, it is possible to compare how many  
49  
50 clinics had treated, followed-up, and treated at least 20 patients to remission in 2012-2016.  
51  
52  
53  
54  
55  
56  
57  
58  
59  
60

1  
2  
3 Figure 3 shows that more clinics had treated at least 20 patients in 2016 than in 2012.

4  
5 Whereas the clinics that had treated at least 20 patients in 2012 were selected for having followed  
6  
7 them up, only 45% of these clinics followed-up at least 20 patients in 2016. About one in three of  
8  
9 these clinics had treated at least 20 patients to remission in 2012 compared to about one in eight  
10  
11 in 2016. The results in the other years fall in between the results in 2012 and 2016.  
12  
13

14  
15  
16 --- Please insert Figure 3 about here ---  
17  
18

19 Out of the 33 clinics that had treated at least 20 patients in 2016 (Figure 3, green bar at the  
20  
21 very left), three (9%) had not followed-up any patient, and 21 (64%) had not treated a single  
22  
23 patient to remission. These 21 clinics had treated a total of 857 patients, with a median (range) of  
24  
25 32 (20-98) patients/clinic.  
26  
27

### 28 29 **Combined outcomes at clinics that followed-up fewer than 10 patients**

30  
31  
32  
33 Figure 4 shows that amongst the about 2600 patients who were treated annually in 2013-2016,  
34  
35 the number of patients treated at clinics that followed-up fewer than 10 patients increased to more  
36  
37 than 1000 in the last two years. In parallel, the proportion of patients who were followed-up and  
38  
39 treated to remission at these clinics decreased. Fewer than one in ten of the patients were treated  
40  
41 to remission in the final three years. Please note that the values for 2012 include clinics that  
42  
43 followed up fewer than 20 patients. Clinics following-up fewer than 10 patients were not reported  
44  
45 separately this year.  
46  
47  
48

49  
50 --- Please insert Figure 4 about here ---  
51  
52

### 53 54 **Published outcomes at Mandometer clinics**

Table 2 shows that the proportion of patients in remission at 12 months assessments was at least 27% and significantly different at the three Mandometer clinics, whose outcomes are published. Treatment continues after the 12 months at these clinics and the proportion of patients in remission increases after various, prolonged periods of time. Please note that these clinics had been operating over various periods of time.

**Table 1.** Proportion of patients in remission at Mandometer clinics.

|                                     | Clinic   |          |       |
|-------------------------------------|----------|----------|-------|
| Outcome                             | Alingsås | Danderyd | Mando |
| Operation (years)                   | 2        | 7        | 18    |
| <u>12 months assessment</u>         |          |          |       |
| Patients in remission               | 13       | 72       | 219   |
| Patients not in remission           | 36       | 107      | 552   |
| Proportion in remission             | 27       | 40*      | 28    |
| <u>Continued treatment (months)</u> |          |          |       |
| Patients in remission               | 19       | 141      | 490   |
| Patients not in remission           | 27       | 27       | 170   |

1  
2  
3 Proportion in remission 39 82 68  
4  
5

6 \*P=0.0017 compared to Alingsås and Mando after P=0.0069 (overall difference).  
7  
8

9  
10 It may be mentioned that the time to remission depends on the diagnosis at admission, with  
11 the longest time to remission for patients with anorexia nervosa (8).  
12  
13  
14

### 15 16 17 18 19 20 21 22 **Outcomes at the three biggest clinics**

23  
24  
25  
26 SCED had treated about four times more patients annually (median: 715; range: 696-724) than  
27 Capiro (175; 157-178) and Mando (123; 81-168), and followed-up about the same proportion of  
28 patients (43; 32-69%) as Capiro (50; 48-65%) and Mando (43; 32-83%). These proportions are  
29 similar to the average proportions of follow-up at all clinics over these years (Figure 1).  
30  
31  
32

33  
34  
35  
36 Figure 5 shows that Mando had treated a bigger proportion of patients to remission than  
37 SCED and Capiro in 2014-2016. Whilst the rate of remission was relatively stable at on average  
38 36% at Mando over these three years, it decreased from 29% to 16% at SCED and from 30% to  
39 14% at Capiro. In 2016, the proportion of patients treated to remission at Mando (35%) was about  
40 twice as big as the corresponding proportion at SCED (16%) and Capiro (14%).  
41  
42  
43  
44  
45  
46  
47  
48

49 --- Please insert Figure 5 about here ---  
50  
51

## 52 **DISCUSSION**

53  
54  
55  
56  
57  
58  
59  
60

## **Patient characteristics, diagnostic procedures, and treatments**

The characteristics of the patients, who have been treated for eating disorders in Sweden, including the proportion of males and children, age and diagnosis, have been relatively stable in recent years and are similar to the characteristics of eating disorders patients in other countries (19). It is worth noting that whilst a minority of the patients were diagnosed with Binge Eating Disorder, that disorder is now the most common eating disorder (20). Although the diagnostic procedures may differ amongst clinics (19), most of the procedures used in Sweden have been developed in other countries. In addition, the treatments used in Sweden, including CBT, psychodynamic therapy, and family therapy, as well as medical and psychopharmacological interventions aiming at restoring physical and mental health are the same as those recommended in the guidelines and used in most countries (19,21–26). The treatment at the Mandometer clinics differs in that an important intervention is the normalization of eating behaviour using real time visual feedback on how to eat as described many times and most recently by video (15). The differences and similarities amongst the Mandometer treatment and CBT have been described in detail recently, including the differences in outcomes (7).

## **Outcomes in Sweden**

About 2600 patients were treated annually at the eating disorders clinics in Sweden in 2012–2016, fewer than half were followed-up, and the proportion of patients treated to remission decreased from one in five in 2012 to less than one in seven in 2016. However, remission rates which are more than three times higher have been publicized nationally. These estimates were derived by excluding patients lost to follow-up and patients followed-up at clinics that did not treat patients to remission. In 2016, only four clinics treated 20 patients to remission; most clinics

1  
2  
3 treated a small number of patients, followed-up a few, and treated only one patient in ten to  
4  
5 remission. Outcomes varied significantly between clinics each year and within clinics over years.  
6  
7 In addition, in 2016 more than half the 33 clinics that had treated on average 32 patients had  
8  
9 failed to treat a single patient to remission; one of these clinics had treated 98 patients  
10  
11 unsuccessfully.  
12  
13  
14

### 15 **Interpretation and comparison with published outcomes**

16  
17  
18  
19 Whilst these findings indicate that the procedures of treatment and follow-up differ amongst  
20  
21 clinics in Sweden, a word of caution seems appropriate. For example, although outcomes were  
22  
23 significantly different over years at the biggest clinic (SCED), patients were treated to remission  
24  
25 all years, suggesting that a statistically significant within-clinic variation may be less significant  
26  
27 clinically. However, it seems unlikely that the decrease from a rate of remission of about 30% in  
28  
29 2014 at this clinic to about half that rate two years later is a matter of random variation. And the  
30  
31 similar decrease in the rate of remission at another clinic in these years (Capiro) suggests that the  
32  
33 procedures at these clinics had deteriorated, at least temporarily.  
34  
35  
36  
37  
38

39 Possible reasons for the variation in outcomes include changes in staffing, training of staff,  
40  
41 patient compliance to treatment, and the physical conditions in the clinics, factors that affect  
42  
43 outcomes in multicenter clinical trials (27). Whilst the “study protocol” of the multicenter trial  
44  
45 aims at reducing the influence of these factors, there is no standard protocol for the treatment of  
46  
47 eating disorders. And although there is agreement that the treatment guidelines for eating  
48  
49 disorders should be followed, this consensus view has not yet improved outcomes (21–23,25,28–  
50  
51 30). For example, an attempt at implementing CBT, which is recommended in all guidelines, in  
52  
53 combination with antidepressant medication for the treatment of bulimia nervosa in primary care  
54  
55  
56  
57  
58  
59  
60



1  
2  
3 in the U.S. resulted in a 70% dropout rate (31). A similar effort in general practice in the U.K.  
4  
5 found that out of 683 patients with a diagnosis of bulimia, about half of the 272 patients who  
6  
7 entered CBT completed the treatment, and although those patients improved, they were not free  
8  
9 of eating disorders symptoms after treatment (32). A recent study aiming to implement CBT for  
10  
11 anorexia nervosa in general practice produced similar results. Thus, out of 257 patient referrals,  
12  
13 44 patients started in treatment and 22 completed the treatment (33), findings that were replicated  
14  
15 in another recent study (34). Compliance is thus a general problem in the treatment of eating  
16  
17 disorders, not a “Swedish” problem, but it can be improved as discussed below.  
18  
19  
20  
21  
22

23 Whether these factors are causally related to the decrease in remission rates in 2015-2016  
24  
25 remains to be determined. But it may be of some significance that as the number of patients  
26  
27 treated at clinics that treated fewer than ten patients to remission increased, the proportion of  
28  
29 patients followed-up and treated to remission decreased (Figure 4). And when the number of  
30  
31 patients followed-up at all clinics increased in 2015, there was a marked decrease in the  
32  
33 proportion of patient treated to remission (Figures 1 and 2).  
34  
35  
36  
37

38 The Mandometer treatment was developed starting in 1993, a theoretical framework and  
39  
40 preliminary findings were reported in 1996 (14,35). A randomized controlled trial demonstrated  
41  
42 its effectiveness and outcomes for 1428 patients treated at six clinics in four countries were  
43  
44 subsequently reported (8,13). The combined rate of remission at these clinics was estimated to be  
45  
46 about 75% in on average one year of treatment and the rate of relapse was estimated to be about  
47  
48 10% over five years of follow-up (8). Similar to Riksät, estimates were done amongst all patients  
49  
50 entering treatment. However, far more patients were lost to follow-up at Riksät’s one year time  
51  
52 point of follow-up than to Mandometer’s procedure of monitoring patients at three-month  
53  
54 intervals throughout treatment and at 1, 2, 3, 6, 9, 12, 18, 24, 36, 48, and 60 months of follow-up  
55  
56  
57  
58  
59  
60

1  
2  
3 (8). Despite the difference, the rate of remission at the Mando clinic in the Stockholm County  
4 Council was on average 33% in 2012-2016 according to the Riksät calculation, which is about  
5  
6 half the estimated published 75% rate of remission after on average one year of treatment (8).  
7  
8  
9

10  
11 Average remission rates should be viewed cautiously as outcomes varied between clinics.  
12  
13 Thus, the published rate of remission at 12 months differed significantly at the three Mandometer  
14 clinics, yet it was higher than the average values reported for all clinics in each of the five years  
15 in Riksät. Differences in treatment methods between the Mandometer clinics and the other clinics  
16 may explain the differences in outcomes (7) and it is possible that outcomes will be more  
17 consistent at the Mandometer clinics once they have been operating for a longer period of time.  
18 For example, the Alingsås clinic had been treating patients for only two years and reached a rate  
19 of remission of only 39%. The variation in the rate of remission at 12 months at the Mandometer  
20 clinics in Amsterdam (16%), San Diego (52%), and Melbourne (25%) (8), support previous  
21 findings that international cultural and medical system differences also affect treatment outcomes  
22 (36). Thus, patients treated in San Diego improved rapidly, but they were often prevented from  
23 continuing in treatment because of the financial constraints of their insurance policies (8), a  
24 problem that would not affect patients in Sweden. It should be noted that relatively few patients  
25 had been treated at these clinics.  
26  
27  
28  
29  
30  
31  
32  
33  
34  
35  
36  
37  
38  
39  
40  
41  
42  
43

44 Dropout and relapse are significant events in the treatment of eating disorders (7,37,38),  
45 and neither these events, nor remission, should be expected to occur after a predetermined period  
46 of time such as at one year of follow-up as used in Riksät. Also, the precise time for follow-up is  
47 not mentioned. It seems likely that this procedure explains why more than half the patients were  
48 lost to follow-up in Riksät. Practical approaches to survival analysis, including time-to-event  
49 analysis, are long available (18,39) and should be used in studies of outcomes of eating disorders  
50  
51  
52  
53  
54  
55  
56  
57  
58  
59  
60

1  
2  
3 treatment. The higher level of compliance at the Mandometer clinics (8) offers support for their  
4  
5 value.  
6  
7

8  
9 Considering the difference between outcomes at Mando and the other Swedish clinics,  
10  
11 including the fact that several hundred patients have been treated to remission, and that the rate of  
12  
13 relapse has been reduced to an estimated 10% at the Mando clinics, a randomized controlled trial  
14  
15 comparing outcomes at these clinics may be redundant; an attempt at a comparison (40), was  
16  
17 fraught with problems (8). The major treatment in Swedish clinics is CBT and a detailed analysis  
18  
19 showed that the remission rates after CBT are lower than those after Mandometer treatment (7).  
20  
21 Psychodynamic therapy is also used in Swedish clinics, although outcomes of this therapy are  
22  
23 inferior to those of CBT (41). Similarly, the use of family-based therapies with children in  
24  
25 Sweden as in other countries, probably does not explain the differences in outcomes. Differences  
26  
27 in patient characteristics at admission may contribute to differences in treatment outcomes and  
28  
29 the possibility that such differences exist should be examined, although the published literature  
30  
31 indicates that they do not (42). Also, there are no differences in the Swedish referral system such  
32  
33 that more severely ill patients at one of the clinics might explain differences in outcomes.  
34  
35  
36  
37  
38  
39

#### 40 **Implications for policy makers**

41  
42

43 Overestimations of the outcomes of the treatment for eating disorders in Sweden have been  
44  
45 publicized over several years (4), including the claim that “70% of the patients are `cured` within  
46  
47 one year”, which is maintained on Sweden’s National Educational Radio Channel (5). This is  
48  
49 similar to the international claim that CBT is “efficacious for a range of eating disorder  
50  
51 presentations in the short and long-term” (30), publicized as: “Based on a solid empirical  
52  
53 foundation, the transdiagnostic enhanced CBT approach will immediately become the gold  
54  
55  
56  
57  
58  
59  
60

1  
2  
3 standard for the treatment of eating disorders” (43), and “[the effect of CBT] is the most dramatic  
4  
5 that we have seen in the literature ... [including] the potency ... and the impressive maintenance  
6  
7 of change over the 19-months follow-up” (44). The published evidence does not support these  
8  
9 claims (7,45–47) and evidence that the outcomes of CBT have been overestimated for the  
10  
11 treatment of other disorders is gradually emerging (48,49). These overstatements have  
12  
13  
14  
15 misinformed health policy makers and can now be corrected.  
16  
17

18 The importance of the National Quality Registries in guiding health care policies in Sweden  
19  
20 was recently re-emphasized (50). In order to guide decisions on matters of health care, national  
21  
22 and international registries must offer reliable information. Widely publicized “facts” need to be  
23  
24 critically examined. Policy makers should be aware that once ill advised policies have been  
25  
26 established, retrospectively controlling their evidence basis can be ineffective, and even  
27  
28 strengthen the misguided policy (51,52).  
29  
30  
31  
32

### 33 **Acknowledgements**

34  
35  
36 We thank Sara Norring, Riksät, Anna Sandelin, the Centre of Registries Västra Götaland, and  
37  
38 Fredrik Westander and Lale Björne-Fergéus, SALAR, for information on Riksät.  
39  
40  
41

### 42 **Transparency declaration**

43  
44  
45 Södersten affirms that the manuscript is an honest, accurate, and transparent account of the study  
46  
47 being reported; that no important aspects of the study have been omitted; and that any  
48  
49 discrepancies from the study as planned (and, if relevant, registered) have been explained.  
50  
51  
52

### 53 **Ethics approval**

1  
2  
3 The project was approved by the Regional Ethical Review Board of Stockholm (Dnr 2015/456-  
4  
5 31).  
6  
7

## 8 **Authors**

9  
10  
11 Södersten examined the registry data in detail over the last two years. He reviewed his  
12  
13 examinations for all authors at regular intervals during the examination period. He is responsible  
14  
15 for the overall content as guarantor and assumes responsibility for all aspects of the work. All  
16  
17 data used for the analysis are included as a supplementary table to this submission, which all  
18  
19 authors are happy to share with other researchers.  
20  
21  
22

23  
24  
25 Brodin is medical statistician and has performed all statistical analyses and reviewed these for all  
26  
27 authors at regular intervals during the examination period.  
28  
29

30  
31 Sjöberg is clinical director of the Mandometer Clinic in Alingsås and responsible for treatment  
32  
33 and data collection and reporting to the registry in 2012-2016.  
34  
35

36  
37 Zandian is clinical quality controller and has been responsible for data collection and reporting to  
38  
39 the registry in 2012-2016.  
40  
41

42  
43 Bergh is clinical director for the Mandometer Clinic in Huddinge and responsible for treatment at  
44  
45 all Mandometer clinics.  
46  
47

48  
49 All authors have seen and reviewed several versions of the manuscript and agreed to its final  
50  
51 version.  
52  
53

54  
55 Södersten is: “the corresponding author and attests that all listed authors meet authorship criteria  
56  
57 and that no others meeting the criteria have been omitted”.  
58  
59

## Contributorship

Åsa Lundqvist BA of the Mandometer Clinic in Stockholm has been contact person with the Rikät registry staff over the years 2012-2016. Ms Lundqvist supervised the reporting of data to the registry and is in charge of the follow-up programme of the Mandometer Clinic.

## Competing interests

Complete openness concerning financial arrangements is intended here. Brodin, Sjöberg and Zandian declare that they have no financial interests related to this study. Our research is carried out at the Karolinska Institute, where Södersten is a professor em. The research is translated clinically by Mando Group AB, a company started by Södersten and Bergh, who have 47.5% of the stock each. Professor Michael Leon of the University of California at Irvine has 5%. Mando Group AB contracts with the County Council of Stockholm every fifth year to treat patients with eating disorders. Mando Groups AB signed its first contract in 1997 with the County Council of Stockholm and, since then, its treatment is one of the standards of care offered to the citizens of Stockholm. This arrangement is the same as when the County Council of Stockholm contracts with its own clinics to treat patients with all kinds of disease, including eating disorders. That is to say, the County Council of Stockholm provides eating-disorder services to the citizens of Stockholm both through a clinic of its own and through Mando Group AB. There is a third provider of care for patients with eating disorders in Stockholm, which is a private clinic. All health care in Sweden is funded through the tax system; private pay is extremely uncommon. It should be added firstly, that Mando Group AB is in compliance with the recommendation of the International Committee of Medical Journal Editors on “Author Responsibilities-Conflicts of Interest” <http://www.icmje.org/recommendations/browse/roles-and-responsibilities/author->

responsibilities--conflicts-of-interest.html. Secondly, it should also be added that all profit that Mando Group AB has made has been re-invested in research and development and that there have been no dividends to stock owners. All of the above is declared in all manuscript submissions and thus far, journals have judged it necessary to publish only some of the details. It seems, however, that the potential ethical problem when scientists translate their research findings into the clinic in a company is not unlike that which arises when any scientist, in an academic setting is developing a theory and needs further economic funding for her/his work and may receive recognition and financial benefits for the work. The incentive is, in part, economic in this case as well and the ethical “problem” is similar in both cases. However, the more important incentive is the improvement of the treatment of patients with eating disorders. We are researchers working in an academic setting and like many other medical research institutes today, the Karolinska Institute encourages scientists to translate their research into the clinic in companies that aim to generate financial profits to be used for research and development (see: [http://ki.se.proxy.kib.ki.se/sites/default/files/summary\\_strategy2018.pdf](http://ki.se.proxy.kib.ki.se/sites/default/files/summary_strategy2018.pdf)).

## **Funding**

This work was supported by The County Council of Stockholm grant number HNSV 15896, HSN 1502-0291, project 3252.

## **Role of the sponsor**

The sponsor had no influence on the work.

## **Data sharing statement**

The data used for this analysis are available in a supplementary table.

## References

1. Swedish Association of Local Authorities and Regions. Swedish National Quality Registries [Internet]. [cited 2018 May 7]. Available from: <http://kvalitetsregister.se/englishpages.2040.html>
2. Government Offices of Sweden. Överenskommelse om stöd till nationella kvalitetsregister under 2018 [Internet]. [cited 2018 May 7]. Available from: <http://www.regeringen.se/overenskommelser-och-avtal/2017/12/nationella-kvalitetsregister/>
3. Swedish Association of Local Authorities and Regions. Vården i Siffror [Internet]. [cited 2018 May 7]. Available from: <https://vardenisiffror.se/>
4. Birgegård A, Norring C, Norring S. National Quality Register for Eating Disorders Treatment [Internet]. [cited 2018 May 7]. Available from: <https://riksat.registercentrum.se/>
5. von Hausswolff-Juhlin Y. Från evidens till praktiska råd [Internet]. [cited 2018 May 7]. Available from: <https://urplay.se/program/203090-ur-samtiden-ny-kunskap-om-atstorningar-fran-evidens-till-praktiska-rad>
6. Linardon J, Wade TD, de la Piedad Garcia X, Brennan L. The efficacy of cognitive-behavioral therapy for eating disorders: A systematic review and meta-analysis. *J Consult Clin Psychol*. 2017 Nov;85(11):1080–94.
7. Södersten P, Bergh C, Leon M, Brodin U, Zandian M. Cognitive behavior therapy for eating disorders versus normalization of eating behavior. *Physiol Behav*. 2017 Mar 16;174:178–90.
8. Bergh C, Callmar M, Danemar S, Hölcke M, Isberg S, Leon M, et al. Effective treatment of eating disorders: Results at multiple sites. *Behav Neurosci*. 2013 Dec;127(6):878–89.
9. Fairburn C, Cooper Z, O'Connor M. Eating disorders examination (16.0D). In C. Fairburn (Ed.), *Cognitive behavior therapy and eating disorders*. New York, N.Y: Guilford Press; 2008.
10. Bohn K, Fairburn CG. Clinical impairment assessment questionnaire (CIA 3.0). In: *Cognitive behavior therapy for eating disorders*. New York, N.Y: Guildford Press; p. 315–7.
11. Aas IHM. Global Assessment of Functioning (GAF): properties and frontier of current knowledge. *Ann Gen Psychiatry*. 2010 May 7;9:20.
12. American Psychiatric Association. *Diagnostic and Statistical Manual of Mental Disorders*. fourth ed. Washington, D.C.: American Psychiatric Association; 1994.
13. Bergh C, Brodin U, Lindberg G, Södersten P. Randomized controlled trial of a treatment for anorexia and bulimia nervosa. *Proc Natl Acad Sci*. 2002 Jul 9;99(14):9486–91.



14. Bergh C, Eklund S, Eriksson M, Lindberg G, Södersten P. A new treatment of anorexia nervosa. *The Lancet*. 1996 Aug 31;348(9027):611–2.
15. Esfandiari M, Papapanagiotou V, Diou C, Zandian M, Nolstam J, Södersten P, et al. Control of eating behavior using a novel feedback system. *J Vis Exp JoVE*. 2018 08;(135).
16. Zandian M, Holmstedt E, Larsson A, Bergh C, Brodin U, Södersten P. Anxiolytic effect of warmth in anorexia nervosa. *Acta Psychiatr Scand*. 2017;135(3):266–7.
17. Kirkwood BR, Sterne JAC. *Essential Medical Statistics*. Blackwell, Oxford; 2003.
18. Tableman M, Kim JS. *Survival Analysis Using S: Analysis of Time-to-Event Data*. Boca Raton, FL: Chapman & Hall/CRC; 2004.
19. Treasure J, Claudino AM, Zucker N. Eating disorders. *The Lancet*. 2010 Feb 19;375(9714):583–93.
20. Erskine HE, Whiteford HA. Epidemiology of binge eating disorder. *Curr Opin Psychiatry*. 2018 Aug 13;
21. af Sandeberg A-M, Birgegård A, Mohlin L, Nordlander Ström C, Norring C, Siverstrand M-L. Regionalt vårdprogram – ätstörningar. [Internet]. [cited 2018 May 7]. Available from: [http://www1.psykiatristod.se/Global/vardprogram\\_fulltext/RV\\_Atstorningar\\_2009\\_updat2010.pdf](http://www1.psykiatristod.se/Global/vardprogram_fulltext/RV_Atstorningar_2009_updat2010.pdf)
22. Hay P, Chinn D, Forbes D, Madden S, Newton R, Sugenor L, et al. Royal Australian and New Zealand College of Psychiatrists clinical practice guidelines for the treatment of eating disorders. *Aust N Z J Psychiatry*. 2014 Nov 1;48(11):977–1008.
23. Hay PP, Bacaltchuk J, Stefano S, Kashyap P. Psychological treatments for bulimia nervosa and bingeing. *Cochrane Database Syst Rev*. 2009 Oct 7;(4):CD000562.
24. Hay P. A systematic review of evidence for psychological treatments in eating disorders: 2005–2012. *Int J Eat Disord*. 2013 Jul 1;46(5):462–9.
25. Zipfel S, Giel KE, Bulik CM, Hay P, Schmidt U. Anorexia nervosa: aetiology, assessment, and treatment. *Lancet Psychiatry*. 2015 Dec;2(12):1099–111.
26. Treasure J, Zipfel S, Micali N, Wade T, Stice E, Claudino A, et al. Anorexia nervosa. *Nat Rev Dis Primer*. 2015 26;1:15074.
27. Guthrie LB, Oken E, Sterne JA, Gillman MW, Patel R, Vilchuck K, et al. Ongoing monitoring of data clustering in multicenter studies. *BMC Med Res Methodol*. 2012 Mar 13;12:29.
28. Allen S, Dalton WT. Treatment of eating disorders in primary care: a systematic review. *J Health Psychol*. 2011 Nov;16(8):1165–76.

- 1
  - 2
  - 3
  - 4
  - 5
  - 6
  - 7
  - 8
  - 9
  - 10
  - 11
  - 12
  - 13
  - 14
  - 15
  - 16
  - 17
  - 18
  - 19
  - 20
  - 21
  - 22
  - 23
  - 24
  - 25
  - 26
  - 27
  - 28
  - 29
  - 30
  - 31
  - 32
  - 33
  - 34
  - 35
  - 36
  - 37
  - 38
  - 39
  - 40
  - 41
  - 42
  - 43
  - 44
  - 45
  - 46
  - 47
  - 48
  - 49
  - 50
  - 51
  - 52
  - 53
  - 54
  - 55
  - 56
  - 57
  - 58
  - 59
  - 60
29. Le Grange D, Hughes EK, Court A, Yeo M, Crosby RD, Sawyer SM. Randomized clinical trial of parent-focused treatment and family-based treatment for adolescent anorexia nervosa. *J Am Acad Child Adolesc Psychiatry*. 2016 Aug;55(8):683–92.
30. Linardon J, Fairburn CG, Fitzsimmons-Craft EE, Wilfley DE, Brennan L. The empirical status of the third-wave behaviour therapies for the treatment of eating disorders: A systematic review. *Clin Psychol Rev*. 2017 Dec;58:125–40.
31. Walsh BT, Fairburn CG, Mickley D, Sysko R, Parides MK. Treatment of bulimia nervosa in a primary care setting. *Am J Psychiatry*. 2004 Mar;161(3):556–61.
32. Knott S, Woodward D, Hoefkens A, Limbert C. Cognitive behaviour therapy for bulimia nervosa and eating disorders not otherwise specified: Translation from randomized controlled trial to a clinical setting. *Behav Cogn Psychother*. 2015 Nov;43(6):641–54.
33. Frostad S, Danielsen YS, Rekkedal GÅ, Jevne C, Dalle Grave R, Rø Ø, et al. Implementation of enhanced cognitive behaviour therapy (CBT-E) for adults with anorexia nervosa in an outpatient eating-disorder unit at a public hospital. *J Eat Disord*. 2018;6:12.
34. Jenkins PE, Morgan C, Houlihan C. Outpatient CBT for underweight patients with eating disorders: Effectiveness within a National Health Service (NHS) Eating Disorders Service. *Behav Cogn Psychother*. 2018 Aug 2;1–13.
35. Bergh C, Södersten P. Anorexia nervosa, self-starvation and the reward of stress. *Nat Med*. 1996 Jan;2(1):21–2.
36. Wright JG, Katz JN, Losina E. Clinical trials in orthopaedics research. Part I. Cultural and practical barriers to randomized trials in orthopaedics. *J Bone Joint Surg Am [Internet]*. 2011 Mar 2 [cited 2018 May 7];93(5). Available from: <https://www.ncbi.nlm.nih.gov/pmc/articles/PMC3043780/>
37. Linardon J, Hindle A, Brennan L. Dropout from cognitive-behavioral therapy for eating disorders: A meta-analysis of randomized, controlled trials. *Int J Eat Disord*. 2018 Mar 1;
38. Berends T, Boonstra N, van Elburg A. Relapse in anorexia nervosa: a systematic review and meta-analysis. *Curr Opin Psychiatry*. 2018 Aug 13;
39. Pocock SJ. *Clinical Trials: A Practical Approach*. First. Chichester West Sussex ; New York: Wiley; 1984. 278 p.
40. van Elburg AA, Hillebrand JJG, Huyser C, Snoek M, Kas MJH, Hoek HW, et al. Mandometer treatment not superior to treatment as usual for anorexia nervosa. *Int J Eat Disord*. 2012 Mar 1;45(2):193–201.
41. Poulsen S, Lunn S, Daniel SIF, Folke S, Mathiesen BB, Katznelson H, et al. A randomized controlled trial of psychoanalytic psychotherapy or cognitive-behavioral therapy for bulimia nervosa. *Am J Psychiatry*. 2014 Jan;171(1):109–16.

- 1
- 2
- 3 42. Södersten P, Bergh C, Leon M, Zandian M. Dopamine and anorexia nervosa. *Neurosci*
- 4 *Biobehav Rev.* 2016 Jan;60:26–30.
- 5
- 6 43. Fairburn CG. *Cognitive Behavior Therapy and Eating Disorders.* New York: The Guilford
- 7 Press; 2008.
- 8
- 9 44. Hollon SD, Wilson GT. Psychoanalysis or cognitive-behavioral therapy for bulimia
- 10 *nervosa: the specificity of psychological treatments.* *Am J Psychiatry.* 2014 Jan;171(1):13–
- 11 6.
- 12
- 13 45. Lampard AM, Sharbanee JM. The cognitive-behavioural theory and treatment of bulimia
- 14 *nervosa: An examination of treatment mechanisms and future directions.* *Aust Psychol.*
- 15 2015 Feb 1;50(1):6–13.
- 16
- 17 46. Troscianko ET. CBT for eating disorders: A not-yet-success story [Internet]. [cited 2018
- 18 May 8]. Available from: <https://www.psychologytoday.com/us/experts/emily-troscianko>
- 19
- 20 47. Gutiérrez E, Carrera O. Anorexia nervosa treatments and Occam’s razor. *Psychol Med.*
- 21 2018 Jan 25;1–2.
- 22
- 23 48. Christensen H, Mackinnon AJ. Review: computerised CBT improves adult depression in the
- 24 *short-term, but its effect may have been overestimated previously.* *Evid Based Ment Health.*
- 25 2013 Nov;16(4):119.
- 26
- 27 49. Steinert C, Munder T, Rabung S, Hoyer J, Leichsenring F. Psychodynamic therapy: As
- 28 *efficacious as other empirically supported treatments? A meta-analysis testing equivalence*
- 29 *of outcomes.* *Am J Psychiatry.* 2017 01;174(10):943–53.
- 30
- 31 50. Granström E, Hansson J, Sparring V, Brommels M, Nyström ME. Enhancing policy
- 32 *implementation to improve healthcare practices: The role and strategies of hybrid national-*
- 33 *local support structures.* *Int J Health Plann Manage.* 2018 Aug 9;
- 34
- 35 51. Lewandowsky S, Ecker UKH, Seifert CM, Schwarz N, Cook J. Misinformation and its
- 36 *correction: Continued influence and successful debiasing.* *Psychol Sci Public Interest J Am*
- 37 *Psychol Soc.* 2012 Dec;13(3):106–31.
- 38
- 39 52. Fazio LK, Brashier NM, Payne BK, Marsh EJ. Knowledge does not protect against illusory
- 40 *truth.* *J Exp Psychol Gen.* 2015 Oct;144(5):993–1002.
- 41
- 42
- 43
- 44
- 45
- 46
- 47
- 48
- 49
- 50
- 51
- 52
- 53
- 54
- 55
- 56
- 57
- 58
- 59
- 60

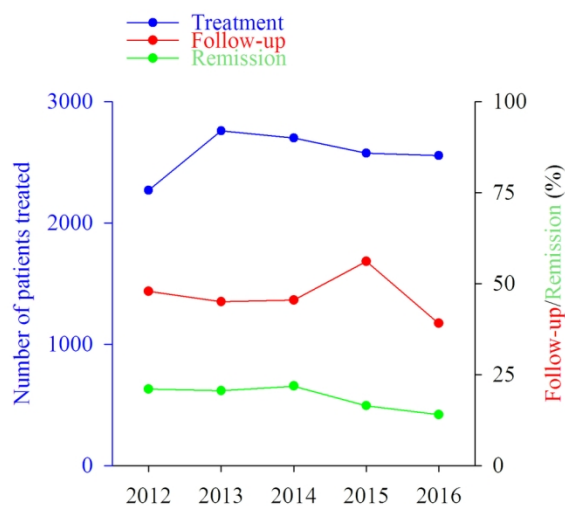

Figure 1. Number of patients treated at all clinics in Sweden and proportion of patients followed-up and in remission one year later. The year on the x-axis indicates the year of follow-up, the corresponding number of patients starting their treatment the year before.

127x180mm (300 x 300 DPI)

1  
2  
3  
4  
5  
6  
7  
8  
9  
10  
11  
12  
13  
14  
15  
16  
17  
18  
19  
20  
21  
22  
23  
24  
25  
26  
27  
28  
29  
30  
31  
32  
33  
34  
35  
36  
37  
38  
39  
40  
41  
42  
43  
44  
45  
46  
47  
48  
49  
50  
51  
52  
53  
54  
55  
56  
57  
58  
59  
60

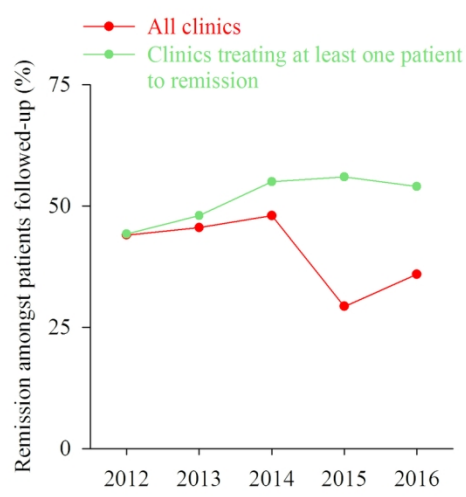

Figure 2. Proportion of patients in remission at all clinics that followed-up their patients and at clinics that treated at least one patient to remission.

127x180mm (300 x 300 DPI)

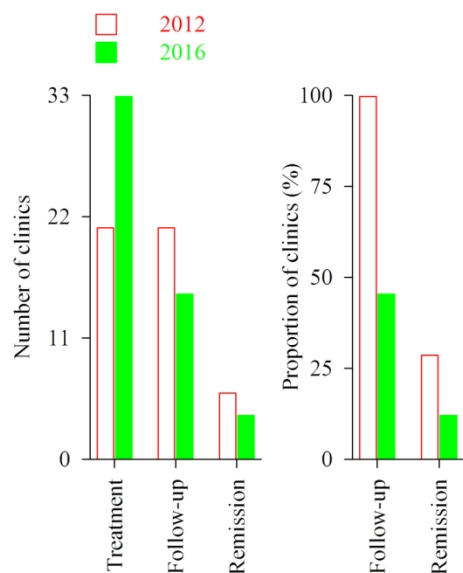

Figure 3. Number of clinics that treated, followed-up, and treated at least 20 patients to remission and proportion of clinics that followed-up and treated at least 20 patients to remission in 2012 and 2016.

127x180mm (300 x 300 DPI)

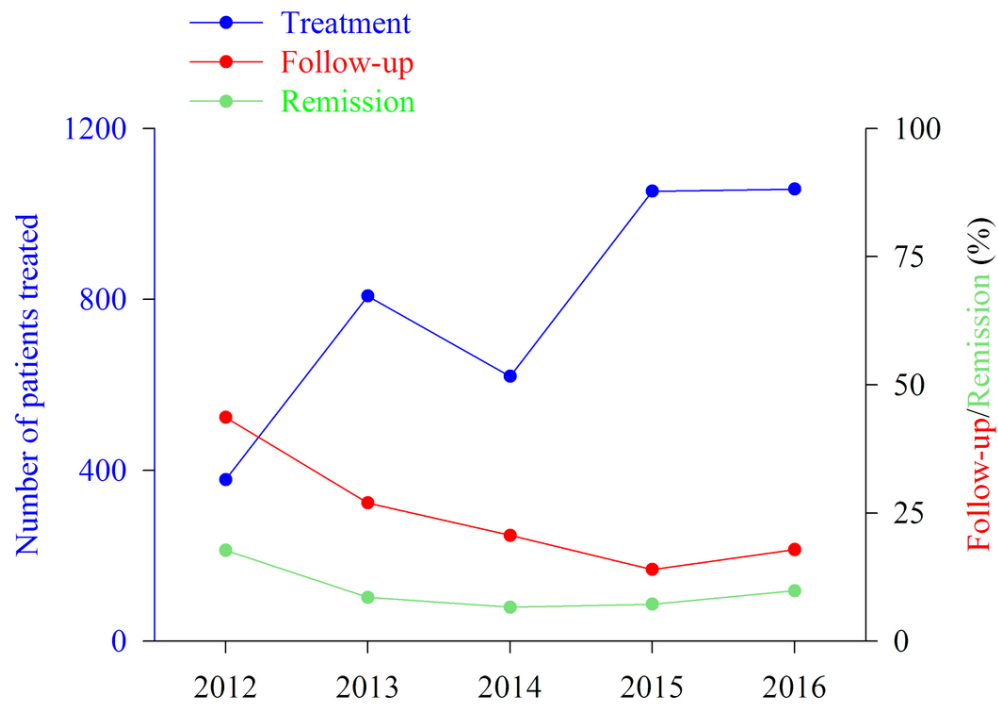

Figure 4. Number of patients treated at clinics that followed-up fewer than 10 patients (2013-2016) or 20 patients (2012) and proportion of patients followed-up and in remission one year later. The year on the x-axis indicates the year of follow-up, the corresponding number of patients starting their treatment the year before.

89x66mm (300 x 300 DPI)

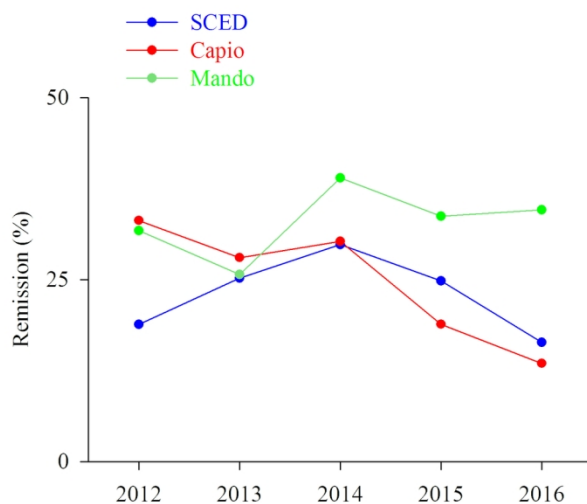

Figure 5. Proportion of patients treated to remission at the three clinics that treated more patients to remission than any other clinic, the Stockholm Centre for Eating Disorders (SCED), the Capiro Centre for Eating Disorders (Capiro), and the Mandometer Clinic in Stockholm (Mando).

127x180mm (300 x 300 DPI)



**Supplementary table.**

Number of patients treated (Treat), followed-up (F-up), and in remission at follow-up (Rem) at eating disorders clinics in Sweden in 2012-2016. The three clinics in the Stockholm County Council are the Stockholm Centre for Eating Disorders (SCED, A01), Caphio Centre for Eating Disorders (Caphio, A04), and the Mandometer Clinic (Mando (B01). Other is the combination of all clinics that followed-up fewer than 20 patients in 2012-2013 and fewer than 10 patients in 2014-2016.

Whilst most of the cells can filled in, it is not possible to fill in all cells, because of the procedures of follow-up. The clinics are arranged from the maximal-minimal number of patients treated.

| <b>2012</b>   |              |             |            | <b>2013</b>   |              |             |            | <b>2014</b>   |              |             |            |
|---------------|--------------|-------------|------------|---------------|--------------|-------------|------------|---------------|--------------|-------------|------------|
| <b>Clinic</b> | <b>Treat</b> | <b>F-up</b> | <b>Rem</b> | <b>Clinic</b> | <b>Treat</b> | <b>F-up</b> | <b>Rem</b> | <b>Clinic</b> | <b>Treat</b> | <b>F-up</b> | <b>Rem</b> |
| <b>A01</b>    | 696          | 224         | 131        | <b>A01</b>    | 710          | 305         | 179        | <b>A01</b>    | 705          | 339         | 210        |
| <b>A04</b>    | 157          | 93          | 52         | <b>A04</b>    | 176          | 88          | 49         | <b>A04</b>    | 162          | 77          | 49         |
| <b>B01</b>    | 123          | 53          | 39         | <b>B01</b>    | 168          | 54          | 43         | <b>B01</b>    | 136          | 59          | 53         |
| <b>T01</b>    | 120          | 50          | 21         | <b>T01</b>    | 116          | 39          | 20         | <b>M10</b>    | 105          | 36          | 20         |
| <b>M10</b>    | 107          | 38          | 22         | <b>M10</b>    | 111          | 36          | 22         | <b>T01</b>    | 99           | 46          | 21         |
| <b>U02</b>    | 90           | 23          | 9          | <b>O09</b>    | 89           | 36          | 19         | <b>X02</b>    | 85           | 40          | 22         |
| <b>O09</b>    | 78           | 38          | 16         | <b>E12</b>    | 83           | 41          | 28         | <b>H01</b>    | 82           | 36          | 15         |
| <b>E12</b>    | 66           | 25          | 14         | <b>Å04</b>    | 63           | 35          | 21         | <b>U02</b>    | 78           | 16          | 6          |
| <b>N05</b>    | 49           | 26          | 11         | <b>H01</b>    | 59           | 43          | 18         | <b>E12</b>    | 72           | 38          | 23         |
| <b>R01</b>    | 48           | 33          | 13         | <b>N02</b>    | 58           | 30          | 7          | <b>N07</b>    | 66           | 16          | 3          |
| <b>H01</b>    | 44           | 44          | 12         | <b>O07</b>    | 56           | 35          | 4          | <b>S02</b>    | 63           | 1           | 0          |
| <b>D03</b>    | 40           | 38          | 7          | <b>O03</b>    | 44           | 44          | 6          | <b>O09</b>    | 57           | 27          | 15         |
| <b>K08</b>    | 36           | 24          | 12         | <b>M12</b>    | 42           | 41          | 10         | <b>N02</b>    | 55           | 32          | 15         |
| <b>O03</b>    | 36           | 33          | 8          | <b>N05</b>    | 39           | 26          | 3          | <b>C04</b>    | 52           | 0           | 0          |
| <b>Å04</b>    | 33           | 21          | 7          | <b>N07</b>    | 39           | 21          | 1          | <b>O03</b>    | 52           | 30          | 5          |
| <b>O07</b>    | 31           | 31          | 5          | <b>C03</b>    | 38           | 30          | 13         | <b>W11</b>    | 49           | 11          | 0          |
| <b>W01</b>    | 30           | 28          | 20         | <b>P04</b>    | 33           | 32          | 9          | <b>O07</b>    | 43           | 16          | 2          |
| <b>N02</b>    | 29           | 28          | 1          | <b>W01</b>    | 28           | 28          | 9          | <b>N05</b>    | 40           | 16          | 8          |
| <b>N07</b>    | 29           | 22          | 2          | <b>D03</b>    |              | 12          | 3          | <b>C03</b>    | 39           | 17          | 5          |
| <b>P04</b>    | 26           | 26          | 0          | <b>K08</b>    |              | 13          | 9          | <b>M52</b>    | 39           | 20          | 11         |
| <b>C03</b>    | 21           | 21          | 8          | <b>U02</b>    |              | 12          | 5          | <b>P04</b>    | 37           | 15          | 0          |
| <b>Other</b>  | 378          | 165         | 67         | <b>Z02</b>    |              | 13          | 8          | <b>Å02</b>    | 33           | 27          | 14         |
|               |              |             |            | <b>Å02</b>    |              | 11          | 10         | <b>D03</b>    | 31           | 11          | 0          |
| <b>Sum</b>    | <b>2267</b>  | <b>1084</b> | <b>477</b> | <b>Other</b>  | 806          | 218         | 69         | <b>M03</b>    | 30           | 7           | 0          |
|               |              |             |            |               |              |             |            | <b>Å04</b>    | 30           | 19          | 14         |
|               |              |             |            | <b>Sum</b>    | <b>2758</b>  | <b>1243</b> | <b>566</b> | <b>R01</b>    | 29           | 4           | 0          |
|               |              |             |            |               |              |             |            | <b>Y06</b>    | 29           | 0           | 0          |
|               |              |             |            |               |              |             |            | <b>M12</b>    | 26           | 15          | 7          |
|               |              |             |            |               |              |             |            | <b>W04</b>    | 26           | 8           | 0          |
|               |              |             |            |               |              |             |            | <b>K08</b>    | 25           | 13          | 9          |
|               |              |             |            |               |              |             |            | <b>W01</b>    | 24           | 9           | 0          |
|               |              |             |            |               |              |             |            | <b>B03</b>    | 20           | 4           | 0          |
|               |              |             |            |               |              |             |            | <b>B05</b>    | 19           | 1           | 0          |
|               |              |             |            |               |              |             |            | <b>Z02</b>    | 19           | 10          | 10         |
|               |              |             |            |               |              |             |            | <b>Å12</b>    | 19           | 4           | 0          |
|               |              |             |            |               |              |             |            | <b>D08</b>    | 18           | 10          | 8          |
|               |              |             |            |               |              |             |            | <b>F01</b>    | 17           | 10          | 0          |
|               |              |             |            |               |              |             |            | <b>Y05</b>    | 16           | 3           | 0          |
|               |              |             |            |               |              |             |            | <b>O66</b>    | 15           | 6           | 0          |

|              |             |             |            |
|--------------|-------------|-------------|------------|
| <b>E08</b>   | 13          | 6           | 0          |
| <b>F02</b>   | 13          | 12          | 3          |
| <b>M28</b>   | 13          | 7           | 0          |
| <b>Å06</b>   | 11          | 2           | 0          |
| <b>E09</b>   | 9           | 2           | 0          |
| <b>I05</b>   | 9           | 0           | 0          |
| <b>Y08</b>   | 9           | 1           | 0          |
| <b>D14</b>   | 8           | 0           | 0          |
| <b>Z05</b>   | 8           | 0           | 0          |
| <b>G03</b>   | 7           | 5           | 0          |
| <b>E06</b>   | 6           | 0           | 0          |
| <b>E17</b>   | 6           | 4           | 0          |
| <b>D06</b>   | 5           | 0           | 0          |
| <b>I01</b>   | 5           | 0           | 0          |
| <b>Å11</b>   | 5           | 3           | 0          |
| <b>F04</b>   | 4           | 2           | 0          |
| <b>F10</b>   | 4           | 0           | 0          |
| <b>E11</b>   | 3           | 0           | 0          |
| <b>E25</b>   | 3           | 2           | 0          |
| <b>O46</b>   | 3           | 3           | 0          |
| <b>E22</b>   | 2           | 1           | 0          |
| <b>O01</b>   | 2           | 0           | 0          |
| <b>B10</b>   | 1           | 0           | 0          |
| <b>F07</b>   | 1           | 0           | 0          |
| <b>F08</b>   | 1           | 0           | 0          |
| <b>K09</b>   | 1           | 0           | 0          |
| <b>O67</b>   | 1           | 0           | 0          |
| <b>W13</b>   | 1           | 0           | 0          |
| <b>Y07</b>   | 1           | 0           | 0          |
| <b>Y10</b>   | 1           | 0           | 0          |
| <b>Y11</b>   | 1           | 0           | 0          |
| <b>I01</b>   | 0           | 0           | 0          |
| <b>M37</b>   | 0           | 0           | 0          |
| <b>M57</b>   | 0           | 0           | 0          |
| <b>O27</b>   | 0           | 0           | 0          |
| <b>O31</b>   | 0           | 0           | 0          |
| <b>O35</b>   | 0           | 0           | 0          |
| <b>O36</b>   | 0           | 0           | 0          |
| <b>O37</b>   | 0           | 0           | 0          |
| <b>O50</b>   | 0           | 0           | 0          |
| <b>O72</b>   | 0           | 0           | 0          |
| <b>Other</b> |             | 128         | 41         |
| <b>Sum</b>   | <b>2699</b> | <b>1098</b> | <b>548</b> |

## 2015

| Clinic | Treat | F-up | Rem |
|--------|-------|------|-----|
| A01    | 734   | 505  | 182 |
| A04    | 175   | 113  | 33  |
| O09    | 109   | 13   | 0   |
| T01    | 106   | 36   | 0   |
| B01    | 95    | 79   | 32  |
| M10    | 95    | 42   | 15  |
| H01    | 93    | 51   | 4   |
| X02    | 83    | 7    | 0   |
| S02    | 73    | 37   | 0   |
| U02    | 73    | 14   | 0   |
| N07    | 71    | 20   | 0   |
| E12    | 59    | 49   | 20  |
| N02    | 47    | 41   | 6   |
| N05    | 45    | 5    | 0   |
| M52    | 40    | 7    | 3   |
| C04    | 36    | 0    | 0   |
| O07    | 35    | 31   | 3   |
| M03    | 34    | 5    | 0   |
| Å04    | 34    | 14   | 7   |
| D03    | 31    | 18   | 0   |
| M12    | 31    | 9    | 0   |
| O03    | 29    | 21   | 10  |
| C03    | 26    | 13   | 11  |
| Z02    | 26    | 13   | 9   |
| M57    | 25    | 0    | 0   |
| K08    | 23    | 16   | 0   |
| B03    | 22    | 14   | 0   |
| Å02    | 22    | 11   | 0   |
| E08    | 18    | 10   | 0   |
| O27    | 17    | 17   | 7   |
| P04    | 17    | 0    | 0   |
| W01    | 17    | 17   | 5   |
| Y06    | 15    | 7    | 0   |
| D08    | 14    | 2    | 0   |
| G03    | 14    | 6    | 0   |
| I05    | 13    | 0    | 0   |
| O66    | 13    | 13   | 0   |
| R01    | 13    | 6    | 0   |
| Y05    | 13    | 2    | 0   |

## 2016

| Clinic | Treat | F-up | Rem |
|--------|-------|------|-----|
| A01    | 715   | 298  | 117 |
| A04    | 178   | 95   | 24  |
| T01    | 98    | 20   | 0   |
| O09    | 85    | 40   | 0   |
| X02    | 82    | 49   | 0   |
| B01    | 81    | 43   | 28  |
| O27    | 80    | 52   | 7   |
| H01    | 77    | 23   | 6   |
| M10    | 75    | 17   | 6   |
| E12    | 67    | 35   | 7   |
| C03    | 64    | 30   | 20  |
| N07    | 64    | 1    | 0   |
| U02    | 63    | 0    | 0   |
| C04    | 49    | 0    | 0   |
| O07    | 49    | 28   | 5   |
| W11    | 44    | 2    | 0   |
| N02    | 40    | 13   | 0   |
| M52    | 36    | 34   | 0   |
| N05    | 35    | 26   | 0   |
| O03    | 35    | 24   | 8   |
| S02    | 32    | 7    | 0   |
| W01    | 31    | 29   | 11  |
| Y06    | 31    | 5    | 0   |
| Å04    | 30    | 12   | 10  |
| M03    | 26    | 1    | 0   |
| B03    | 23    | 1    | 0   |
| D03    | 23    | 15   | 0   |
| K08    | 23    | 13   | 0   |
| L01    | 21    | 0    | 0   |
| M37    | 21    | 1    | 0   |
| Z02    | 21    | 6    | 0   |
| E17    | 20    | 12   | 0   |
| Å12    | 20    | 1    | 0   |
| M28    | 19    | 7    | 0   |
| R01    | 19    | 5    | 0   |
| Å02    | 19    | 5    | 0   |
| W04    | 17    | 6    | 0   |
| O66    | 15    | 15   | 5   |
| Y05    | 15    | 2    | 0   |

|    |              |             |             |            |              |             |            |            |
|----|--------------|-------------|-------------|------------|--------------|-------------|------------|------------|
| 1  |              |             |             |            |              |             |            |            |
| 2  | <b>D14</b>   | 12          | 0           | 0          | <b>F01</b>   | 13          | 0          | 0          |
| 3  | <b>W11</b>   | 12          | 0           | 0          | <b>E09</b>   | 11          | 0          | 0          |
| 4  | <b>E17</b>   | 10          | 6           | 0          | <b>M12</b>   | 10          | 3          | 0          |
| 5  | <b>W04</b>   | 10          | 4           | 0          | <b>O72</b>   | 9           | 1          | 0          |
| 6  | <b>Å06</b>   | 10          | 8           | 0          | <b>B05</b>   | 7           | 3          | 0          |
| 7  | <b>Å12</b>   | 10          | 2           | 0          | <b>E08</b>   | 7           | 3          | 0          |
| 8  | <b>E09</b>   | 9           | 1           | 0          | <b>I05</b>   | 7           | 0          | 0          |
| 9  | <b>B05</b>   | 7           | 2           | 0          | <b>G03</b>   | 6           | 2          | 0          |
| 10 | <b>L01</b>   | 7           | 0           | 0          | <b>Z05</b>   | 6           | 0          | 0          |
| 11 | <b>M28</b>   | 7           | 1           | 0          | <b>Å06</b>   | 6           | 4          | 0          |
| 12 | <b>Y08</b>   | 6           | 1           | 0          | <b>D08</b>   | 5           | 4          | 0          |
| 13 | <b>E06</b>   | 5           | 0           | 0          | <b>E06</b>   | 5           | 0          | 0          |
| 14 | <b>F02</b>   | 5           | 0           | 0          | <b>I02</b>   | 5           | 2          | 0          |
| 15 | <b>Å11</b>   | 5           | 0           | 0          | <b>M57</b>   | 5           | 0          | 0          |
| 16 | <b>I02</b>   | 4           | 1           | 0          | <b>Y08</b>   | 3           | 1          | 0          |
| 17 | <b>M37</b>   | 4           | 4           | 0          | <b>F04</b>   | 2           | 2          | 0          |
| 18 | <b>O72</b>   | 4           | 1           | 0          | <b>O71</b>   | 2           | 0          | 0          |
| 19 | <b>D06</b>   | 2           | 0           | 0          | <b>E22</b>   | 1           | 0          | 0          |
| 20 | <b>F01</b>   | 2           | 2           | 0          | <b>Y11</b>   | 1           | 0          | 0          |
| 21 | <b>F10</b>   | 2           | 0           | 0          | <b>Å11</b>   | 1           | 0          | 0          |
| 22 | <b>Y11</b>   | 2           | 0           | 0          | <b>B10</b>   | 0           | 0          | 0          |
| 23 | <b>B10</b>   | 1           | 0           | 0          | <b>D06</b>   | 0           | 0          | 0          |
| 24 | <b>E25</b>   | 1           | 0           | 0          | <b>D14</b>   | 0           | 0          | 0          |
| 25 | <b>F04</b>   | 1           | 0           | 0          | <b>E25</b>   | 0           | 0          | 0          |
| 26 | <b>Z05</b>   | 1           | 0           | 0          | <b>F02</b>   | 0           | 0          | 0          |
| 27 | <b>E11</b>   | 0           | 0           | 0          | <b>F10</b>   | 0           | 0          | 0          |
| 28 | <b>E22</b>   | 0           | 0           | 0          | <b>P04</b>   | 0           | 0          | 0          |
| 29 | <b>F07</b>   | 0           | 0           | 0          | <b>E11</b>   | 0           | 0          | 0          |
| 30 | <b>F08</b>   | 0           | 0           | 0          | <b>F07</b>   | 0           | 0          | 0          |
| 31 | <b>K09</b>   | 0           | 0           | 0          | <b>F08</b>   | 0           | 0          | 0          |
| 32 | <b>O01</b>   | 0           | 0           | 0          | <b>K09</b>   | 0           | 0          | 0          |
| 33 | <b>O46</b>   | 0           | 0           | 0          | <b>O01</b>   | 0           | 0          | 0          |
| 34 | <b>O67</b>   | 0           | 0           | 0          | <b>O46</b>   | 0           | 0          | 0          |
| 35 | <b>O71</b>   | 0           | 0           | 0          | <b>O67</b>   | 0           | 0          | 0          |
| 36 | <b>W13</b>   | 0           | 0           | 0          | <b>W13</b>   | 0           | 0          | 0          |
| 37 | <b>Y07</b>   | 0           | 0           | 0          | <b>Y07</b>   | 0           | 0          | 0          |
| 38 | <b>Y10</b>   | 0           | 0           | 0          | <b>Y10</b>   | 0           | 0          | 0          |
| 39 | <b>Other</b> |             | 147         | 76         | <b>Other</b> |             |            | 104        |
| 40 |              |             |             |            |              |             |            |            |
| 41 | <b>Sum</b>   | <b>2575</b> | <b>1444</b> | <b>423</b> | <b>Sum</b>   | <b>2555</b> | <b>998</b> | <b>358</b> |
| 42 |              |             |             |            |              |             |            |            |
| 43 |              |             |             |            |              |             |            |            |
| 44 |              |             |             |            |              |             |            |            |
| 45 |              |             |             |            |              |             |            |            |
| 46 |              |             |             |            |              |             |            |            |
| 47 |              |             |             |            |              |             |            |            |
| 48 |              |             |             |            |              |             |            |            |
| 49 |              |             |             |            |              |             |            |            |
| 50 |              |             |             |            |              |             |            |            |
| 51 |              |             |             |            |              |             |            |            |
| 52 |              |             |             |            |              |             |            |            |
| 53 |              |             |             |            |              |             |            |            |
| 54 |              |             |             |            |              |             |            |            |
| 55 |              |             |             |            |              |             |            |            |
| 56 |              |             |             |            |              |             |            |            |
| 57 |              |             |             |            |              |             |            |            |
| 58 |              |             |             |            |              |             |            |            |
| 59 |              |             |             |            |              |             |            |            |
| 60 |              |             |             |            |              |             |            |            |

**STROBE 2007 (v4) Statement—Checklist of items that should be included in reports of cohort studies**

| Section/Topic             | Item # | Recommendation                                                                                                                                                                       | Reported on page # |
|---------------------------|--------|--------------------------------------------------------------------------------------------------------------------------------------------------------------------------------------|--------------------|
| Title and abstract        | 1      | (a) Indicate the study’s design with a commonly used term in the title or the abstract                                                                                               | 1                  |
|                           |        | (b) Provide in the abstract an informative and balanced summary of what was done and what was found                                                                                  | 2-3                |
| <b>Introduction</b>       |        |                                                                                                                                                                                      |                    |
| Background/rationale      | 2      | Explain the scientific background and rationale for the investigation being reported                                                                                                 | 5                  |
| Objectives                | 3      | State specific objectives, including any prespecified hypotheses                                                                                                                     | 5-6                |
| <b>Methods</b>            |        |                                                                                                                                                                                      |                    |
| Study design              | 4      | Present key elements of study design early in the paper                                                                                                                              | 8-10               |
| Setting                   | 5      | Describe the setting, locations, and relevant dates, including periods of recruitment, exposure, follow-up, and data collection                                                      | 5, 6, 8, 9         |
| Participants              | 6      | (a) Give the eligibility criteria, and the sources and methods of selection of participants. Describe methods of follow-up                                                           | 6, 7, 8            |
|                           |        | (b) For matched studies, give matching criteria and number of exposed and unexposed                                                                                                  |                    |
| Variables                 | 7      | Clearly define all outcomes, exposures, predictors, potential confounders, and effect modifiers. Give diagnostic criteria, if applicable                                             | 7                  |
| Data sources/ measurement | 8*     | For each variable of interest, give sources of data and details of methods of assessment (measurement). Describe comparability of assessment methods if there is more than one group | 5, 6,7             |
| Bias                      | 9      | Describe any efforts to address potential sources of bias                                                                                                                            |                    |
| Study size                | 10     | Explain how the study size was arrived at                                                                                                                                            | 6                  |
| Quantitative variables    | 11     | Explain how quantitative variables were handled in the analyses. If applicable, describe which groupings were chosen and why                                                         | 8, 9               |
| Statistical methods       | 12     | (a) Describe all statistical methods, including those used to control for confounding                                                                                                | 8, 9               |
|                           |        | (b) Describe any methods used to examine subgroups and interactions                                                                                                                  |                    |
|                           |        | (c) Explain how missing data were addressed                                                                                                                                          | 8, 9               |
|                           |        | (d) If applicable, explain how loss to follow-up was addressed                                                                                                                       |                    |
|                           |        | (e) Describe any sensitivity analyses                                                                                                                                                |                    |
| <b>Results</b>            |        |                                                                                                                                                                                      |                    |

|                          |     |                                                                                                                                                                                                                                                                                                                                                                                                               |                          |
|--------------------------|-----|---------------------------------------------------------------------------------------------------------------------------------------------------------------------------------------------------------------------------------------------------------------------------------------------------------------------------------------------------------------------------------------------------------------|--------------------------|
| Participants             | 13* | (a) Report numbers of individuals at each stage of study—eg numbers potentially eligible, examined for eligibility, confirmed eligible, included in the study, completing follow-up, and analysed<br>(b) Give reasons for non-participation at each stage<br>(c) Consider use of a flow diagram                                                                                                               | 10                       |
| Descriptive data         | 14* | (a) Give characteristics of study participants (eg demographic, clinical, social) and information on exposures and potential confounders<br>(b) Indicate number of participants with missing data for each variable of interest<br>(c) Summarise follow-up time (eg, average and total amount)                                                                                                                | 10, 11<br><br>11, 13, 14 |
| Outcome data             | 15* | Report numbers of outcome events or summary measures over time                                                                                                                                                                                                                                                                                                                                                | 11-14                    |
| Main results             | 16  | (a) Give unadjusted estimates and, if applicable, confounder-adjusted estimates and their precision (eg, 95% confidence interval). Make clear which confounders were adjusted for and why they were included<br>(b) Report category boundaries when continuous variables were categorized<br>(c) If relevant, consider translating estimates of relative risk into absolute risk for a meaningful time period |                          |
| Other analyses           | 17  | Report other analyses done—eg analyses of subgroups and interactions, and sensitivity analyses                                                                                                                                                                                                                                                                                                                |                          |
| <b>Discussion</b>        |     |                                                                                                                                                                                                                                                                                                                                                                                                               |                          |
| Key results              | 18  | Summarise key results with reference to study objectives                                                                                                                                                                                                                                                                                                                                                      | 16                       |
| <b>Limitations</b>       |     |                                                                                                                                                                                                                                                                                                                                                                                                               |                          |
| Interpretation           | 20  | Give a cautious overall interpretation of results considering objectives, limitations, multiplicity of analyses, results from similar studies, and other relevant evidence                                                                                                                                                                                                                                    | 16, 18                   |
| Generalisability         | 21  | Discuss the generalisability (external validity) of the study results                                                                                                                                                                                                                                                                                                                                         | 19, 20                   |
| <b>Other information</b> |     |                                                                                                                                                                                                                                                                                                                                                                                                               |                          |
| Funding                  | 22  | Give the source of funding and the role of the funders for the present study and, if applicable, for the original study on which the present article is based                                                                                                                                                                                                                                                 | 23, 24                   |

\*Give information separately for cases and controls in case-control studies and, if applicable, for exposed and unexposed groups in cohort and cross-sectional studies.

**Note:** An Explanation and Elaboration article discusses each checklist item and gives methodological background and published examples of transparent reporting. The STROBE checklist is best used in conjunction with this article (freely available on the Web sites of PLoS Medicine at <http://www.plosmedicine.org/>, Annals of Internal Medicine at <http://www.annals.org/>, and Epidemiology at <http://www.epidem.com/>). Information on the STROBE Initiative is available at [www.strobe-statement.org](http://www.strobe-statement.org).

# BMJ Open

## Treatment Outcomes for Eating Disorders in Sweden, 2012-2016 "Data from the National Quality Registry"

|                                 |                                                                                                                                                                                                      |
|---------------------------------|------------------------------------------------------------------------------------------------------------------------------------------------------------------------------------------------------|
| Journal:                        | <i>BMJ Open</i>                                                                                                                                                                                      |
| Manuscript ID                   | bmjopen-2018-024179.R3                                                                                                                                                                               |
| Article Type:                   | Research                                                                                                                                                                                             |
| Date Submitted by the Author:   | 23-Nov-2018                                                                                                                                                                                          |
| Complete List of Authors:       | Södersten, Per; Karolinska Institutet<br>Brodin, Ulf; Karolinska Institutet,<br>Sjöberg, Jennie; Mandometer Clinic<br>Zandian, Modjtaba; Karolinska Institutet<br>Bergh, Cecilia; Mandometer Clinic, |
| <b>Primary Subject Heading</b>: | Public health                                                                                                                                                                                        |
| Secondary Subject Heading:      | Health policy                                                                                                                                                                                        |
| Keywords:                       | Health policy < HEALTH SERVICES ADMINISTRATION & MANAGEMENT, PUBLIC HEALTH, STATISTICS & RESEARCH METHODS                                                                                            |
|                                 |                                                                                                                                                                                                      |

SCHOLARONE™  
Manuscripts

## Treatment Outcomes for Eating Disorders in Sweden, 2012-2016

### “Data from the National Quality Registry”

Per Södersten, Ulf Brodin, Jennie Sjöberg, Modjtaba Zandian, Cecilia Bergh

Department of Neurobiology, Care Sciences and Society, Karolinska Institutet, Mandometer  
Clinic, Novum, S-141 04 Huddinge, Sweden

Per Södersten professor em. Email: [per.sodersten@ki.se](mailto:per.sodersten@ki.se)

Ulf Brodin PhD medical statistician em. Email: [ulf.brodin@ki.se](mailto:ulf.brodin@ki.se)

Jennie Sjöberg RN clinical director. Email: [jennie.sjoberg@mando.se](mailto:jennie.sjoberg@mando.se)

Modjtaba Zandian PhD quality controller. Email: [modjtaba.zandin@ki.se](mailto:modjtaba.zandin@ki.se)

Cecilia Bergh PhD clinical director. Email: [cecilia.bergh@mando.se](mailto:cecilia.bergh@mando.se)

4367 words excluding abstract, strengths and limitations, references, acknowledgements, and

figure legends

52 references

5 figures

2 tables

Correspondence to: Per Södersten [per.sodersten@ki.se](mailto:per.sodersten@ki.se)



## Abstract

**Objective** To report the outcomes of eating disorders treatment in Sweden in 2012-2016.

**Design** The number of patients treated and the number of patients not fulfilling an eating disorders diagnosis (remission) at one year of follow-up at the clinics listed in the National Quality Registry for Eating Disorders Treatment were analyzed. The published outcomes at three clinics, that used survival analysis to estimate outcomes, were compared with their outcomes in the registry. Outcomes at the three biggest clinics were compared.

**Setting** All eating disorders clinics.

**Participants** All patients treated at eating disorders clinics.

**Intervention** Cognitive behavioural therapy at most clinics and normalization of eating behaviour at the three clinics with published outcomes.

**Outcome measure** Proportion of patients in remission.

**Results** About 2600 patients were treated annually, fewer than half were followed-up, and remission rates decreased from 21% in 2014 to 14% in 2016. Outcomes, which differed amongst clinics and within clinics over time, have been publically overestimated by excluding patients lost to follow-up. The published estimated rate of remission at three clinics that treated 1200 patients in 1993-2011 was 27, 28, and 40% at one year of follow-up. The average rate of remission over the three last years at the biggest of these clinics was 36%, but decreased from 29 and 30% to 16 and 14% at the two other of the biggest clinics.

**Conclusions** With more than half the patients lost to follow-up and no data on relapse in the National Quality Registry, it is difficult to estimate the effects of eating disorders treatment in

1  
2  
3 Sweden. Analysis of time to clinically significant events, including an extended period of  
4  
5 follow-up, has improved the quality of the estimates at three clinics. Overestimation of  
6  
7 remission rates has misled health care policies. The effect of eating disorders treatment has  
8  
9 also been overestimated internationally.  
10  
11  
12  
13  
14  
15  
16  
17  
18  
19  
20  
21  
22  
23  
24  
25  
26  
27  
28  
29  
30  
31  
32  
33  
34  
35  
36  
37  
38  
39  
40  
41  
42  
43  
44  
45  
46  
47  
48  
49  
50  
51  
52  
53  
54  
55  
56  
57  
58  
59  
60

For peer review only

### Strengths and limitations of this study

- This study has the strength of analyzing all patients treated, followed-up, and treated to remission at all eating disorders clinics over five years in Sweden.
- These outcomes are available in the National Quality Registry for Eating Disorders Treatment but have not been published in the scientific literature.
- Three clinics have published outcomes at three-month intervals making it possible to compare these outcomes with their outcomes in the registry.
- The study has the strength of showing that a time-to-event analysis improves compliance, facilitating estimation of outcomes.
- It is a limitation that whereas outcomes in the registry covered the years 2012-2016, the published outcomes at the three clinics covered the years 1993-2011.

## INTRODUCTION

The National Quality Registries in Sweden have been developed starting in the 1970s and today there are about 100 registries, covering virtually all kinds of disease (1). The Swedish Association of Local Authorities and Regions (SALAR) and the Swedish Government recently agreed to strengthen the registries financially, pointing to their key role in the development of all aspects of health care, improving the quality of care, facilitating research, including international comparisons of outcomes, guiding health care policies, and making it possible for anyone to compare the outcomes of treatment at individual clinics (1,2). Indeed, the SALAR has a website for such comparisons (3).

The Swedish National Quality Registry for Eating Disorders Treatment, Riksät, was established in 1999 and has published 11 reports, written in Swedish, in 2001-2016 (4). Following the aims of the registries, the objective of Riksät is to “document the outcome of treatment” (quote from the first report in 2001). Thus, the important measures are the number of patients treated and the number of patients in remission at follow-up. These numbers are listed in Riksät but have not been analyzed and reported in the scientific literature. The first aim of the present study is to examine the rate of remission at all eating disorders clinics in Sweden.

The results in Riksät have been publicized nationally as demonstrating increasing rates of remission over the years to 56% in 2015 and that “70% of the patients are ‘cured’ within one year” (4,5). Because these outcomes are better than the outcomes reported in the scientific literature (6,7), the second aim of this study is to examine their evidence basis.

There are three clinics in Sweden, that have published outcomes (8). Because these clinics (Mandometer Clinics) also report to Riksät it is possible to compare their published

1  
2  
3 outcomes with their outcomes in Riksät. The biggest of the three Mandometer clinics is the  
4 clinic in the County Council of Stockholm (Mando). The third aim of this study is to compare  
5 the outcomes at Mando with the outcomes at the two other of the biggest clinics in Sweden,  
6 the Stockholm Centre for Eating Disorders (SCED) and the Capio Centre for Eating Disorders  
7 (Capio).  
8  
9

10  
11  
12  
13  
14  
15  
16 The fourth aim of this study is to call the attention of policy makers to the fact that  
17 outcomes of eating disorders treatment have been overestimated not only in Sweden but in  
18 other countries as well.  
19  
20  
21  
22

## 23 **METHODS**

### 24 **Patients and diagnostic procedures**

25  
26  
27 Riksät lists the number of patients entering treatment each year and the number of patients  
28 followed-up one year later, although the exact time of follow-up is not mentioned. More than  
29 90% of the patients entering treatment at the specialist clinics are listed in the registry, but  
30 patients that are treated at general psychiatric units may not be listed. Whilst there is no  
31 information on how many these patients might be, most patients treated are listed in the  
32 registry. There is no information on long term outcome, including relapse.  
33  
34  
35  
36  
37  
38  
39  
40  
41  
42  
43  
44

45  
46 At the beginning of treatment and at follow-up the patients completed the Eating  
47 Disorders Examination Questionnaire (EDE-Q), which measures eating disorders symptoms  
48 (9), and the Clinical Impairment Assessment (CIA), which measures psychosocial functioning  
49 as a consequence of the eating disorder (10). The EDE-Q was used for patients older than 10  
50 years and the CIA was used for patients older than 18 years. A semistructured interview was  
51 used for children and adults to determine overall psychiatric symptoms and social functioning  
52 (see e.g., (11)). Using these procedures, the patients were diagnosed with Anorexia Nervosa,  
53  
54  
55  
56  
57  
58  
59  
60

1  
2  
3 Bulimia Nervosa, Eating Disorder Not Otherwise Specified, or Binge Eating Disorder relying  
4 on the criteria in the Diagnostic and Statistical Manual of Mental Disorders (DSM-IV) (12).  
5  
6  
7 Patients who no longer fulfilled the diagnostic criteria for an eating disorder were listed as in  
8  
9  
10 remission. About 4-5% of the patients in the yearly reports had been treated before when  
11  
12 entering treatment.  
13  
14

15  
16 Riksät reports changes in the patients' social functioning and their experiences of the  
17  
18 treatment, and these secondary measures improve in parallel as patients go into remission but  
19  
20 will not be considered in this analysis.  
21  
22

23  
24 Whilst Riksät thus includes two time points for assessment, the Mandometer clinics  
25  
26 have developed a treatment in which the patients are assessed at three-month intervals and  
27  
28 followed-up 1, 2, 3, 6, 9, 12, 18, 24, 36, 48, and 60 months after remission. The procedures,  
29  
30 including the criteria for inclusion, exclusion, and remission were published in 2002 (13), and  
31  
32 have been re-published many times (e.g., (8)); another description may be redundant. The  
33  
34 Mandometer clinics also report their outcomes to Riksät.  
35  
36  
37  
38

## 39 **Treatments**

40  
41  
42 The 2012-2014 Riksät reports did not specify the treatments used beyond mentioning that  
43  
44 these were guided by "the principles of cognitive behavioural therapy" (CBT) and that they  
45  
46 could be used with individual patients or with groups of patients. Medical intervention was  
47  
48 used for monitoring and restoring physical health and psychopharmacology was also used,  
49  
50 absence of evidence of their efficiency was pointed out. The 2015-2016 reports provide  
51  
52 details on treatments. Thus, CBT was used with on average 52% of the children and with 72%  
53  
54 of the adults, psychodynamic therapy was used with on average 21% of the children and with  
55  
56 24% of the adults, and family-based therapies were used with on average 38% of the children.  
57  
58  
59  
60

1  
2  
3 The treatment developed at the Mandometer clinics was described in 1996 (14), re-published  
4 some years on (8,13), and because it has since been described in several other papers, another  
5 description may be redundant. Suffice it to say that an important intervention is teaching  
6 patients how to eat normally using real time visual feedback on how much food to eat and  
7 how quickly to eat it. A video of how this method works was published recently (15). In  
8 addition, the patients are provided with warmth, that exerts an anxiolytic effect in 30 minutes  
9 (16), their physical activity is reduced, and they are assisted in restarting their social  
10 interactions (13). Interestingly, re-establishing normal eating behaviour is also the most  
11 important intervention in CBT, although it is not clear how this is achieved (7).

### 25 **Description of outcomes**

26  
27  
28 Initially, Riksät reported the combined outcomes at the clinics across regions in Sweden, the  
29 reports published in 2009 and 2010 were incomplete, and no report was published in 2011.  
30 However, the outcomes at individual clinics were reported in 2012-2016. The number of  
31 patients treated at each clinic and the proportion of patients who were followed-up are listed  
32 in one set of tables in these reports. The number and the proportion of patients in remission at  
33 follow-up are listed in another set of tables. These numbers have been combined into one  
34 table (supplementary table) and used in the analysis.

### 45 **Combined outcomes at all clinics**

46  
47  
48 The numbers of patients treated, followed-up, and treated to remission have been summarized  
49 for all clinics. The number of patients in remission has been related to the number of patients  
50 treated as well as to the number of patients followed-up in an attempt to explain the high  
51 remission rates publicized in Sweden.

1  
2  
3 If the treatment and the follow-up assessments are about the same at all clinics, the  
4 probability for remission should be the same in all clinics. This hypothesis, which can be  
5 formalized as:  $H_0: P_i(\text{Remission}) = P_0(\text{Remission})$  for all clinics,  $i=1, 2, 3, \dots, n$ , was tested  
6 using a test for homogeneity of the data (17).  
7  
8  
9  
10  
11  
12

13 In 2012-2013 Riksät listed the number of clinics that treated and followed-up at least 20  
14 patients. The number of patients treated to remission at these clinics was listed in 2012, but in  
15 2013 the number of patients treated to remission included clinics that had followed-up at least  
16 10 children or 10 adult patients. In 2014-2016 the number of patients treated, followed-up,  
17 and treated to remission was listed for all clinics. Using these data (supplementary table), the  
18 number of clinics following-up at least 20 patients have been analyzed. Outcomes at clinics  
19 following-up fewer than 10 patients have also been analyzed.  
20  
21  
22  
23  
24  
25  
26  
27  
28  
29

### 30 **Published outcomes at Mandometer clinics**

31  
32  
33  
34 Mandometer clinics have published the outcomes of 1428 patients treated at six clinics in four  
35 countries over various periods of time in 1993-2011, and these data are available in the  
36 supplementary files of (8). The three Swedish clinics, in Alingsås, Danderyd, and Huddinge,  
37 treated 1200 of these patients. The clinic in Huddinge, within the Stockholm County Council,  
38 is the oldest clinic and is referred to as Mando in this analysis. The probability of going into  
39 remission over consecutive three-month intervals up to 12 months at these clinics was  
40 estimated using a life-table approach to survival analysis (18). The rate of failure amongst  
41 censored patients was estimated to be 20%, yielding a conservative estimate of treatment  
42 outcomes. This analysis allows comparison between these published outcomes and the  
43 outcomes for the same clinics listed in Riksät.  
44  
45  
46  
47  
48  
49  
50  
51  
52  
53  
54  
55  
56

### 57 **Outcomes at individual clinics**



Outcomes were compared amongst SCED, Capio, and Mando.

## Patient and public involvement

This study is an analysis of patient data in a registry and those patients did not participate in the analysis. The results will be openly available at mandometer.com.

## RESULTS

### Patient characteristics

The characteristics of the patients at the start of treatment were stable over all years and measures of variability are therefore not included. The average proportion of males was 4.6%, the average proportion of children and adolescents, who were <18 years old, was 29%. The age, obviously, was variable and the average mean (SD) age of all patients was 23.1 (8.9) years. The proportion of the various eating disorders diagnoses was also stable over the years and average values are presented in Table 1.

**Table 1.** Diagnoses amongst patients entering treatment for eating disorders in Sweden in 2012-2016. There were about 2600 patient each year and the proportions are averaged over these years. Children were <18 years old.

| Diagnosis                               | Proportion (%) |        |
|-----------------------------------------|----------------|--------|
|                                         | Children       | Adults |
| Anorexia Nervosa                        | 39             | 20     |
| Bulimia Nervosa                         | 8              | 32     |
| Eating Disorder Not Otherwise Specified | 45             | 37     |

|                       |   |   |
|-----------------------|---|---|
| Binge Eating Disorder | 1 | 6 |
| Other*                | 7 | 5 |

\*Not specified.

### Combined outcomes at all clinics

Figure 1 shows that the total number of patients treated at all clinics increased to about 2600 in 2013, and remained relatively stable over the following years. The figure also shows that fewer than half the patients were typically followed-up a year later and that the rate of remission was about 21% in 2012-2014, and decreased to 14% in 2016. The number of patients treated to remission increased from 477 in 2012 to 589 in 2014 and decreased to 358 in 2016. There is no information on possible differences in the number of patients in remission related to the diagnosis at the start of treatment.

--- Please insert Figure 1 about here ---

Figure 2 shows firstly, that the rate of remission at all clinics that followed-up their patients was less than 50% in 2012-2014, 29% in 2015, and 36% in 2016. Secondly, the figure shows that the rate of remission at clinics that had treated at least one patient to remission increased to 56% in 2015 and decreased to 54% in 2016. The second analysis thus excluded patients followed-up at clinics that did not treat a single patient to remission. The significance of these two calculations of remission rates is clarified in the Discussion.

--- Please insert Figure 2 about here ---

### Variability in outcomes

1  
2  
3 The probability of going into remission in 2012 was significantly different amongst the 17  
4 clinics that had treated patients in all recorded years ( $P < 0.001$ ;  $\text{Chi}^2 = 80.2$ ,  $\text{df} = 16$ ). The  
5 probability of going into remission was also significantly different amongst the five clinics  
6 that had treated at least 100 patients in 2012 ( $P < 0.001$ ;  $\text{Chi}^2 = 23.7$ ,  $\text{df} = 4$ ). Analysis of the other  
7 years gives similar results.  
8  
9  
10  
11  
12  
13  
14

15  
16 Analysis of the results at SCED showed that the probability of going into remission was  
17 significantly different over the years ( $P < 0.001$ ;  $\text{Chi}^2 = 46.3$ ,  $\text{df} = 4$ ). Analysis of the other  
18 clinics gives similar results.  
19  
20  
21  
22

### 23 24 **Combined outcomes at clinics that followed-up at least 20 patients**

25  
26 Because Riksät reported on clinics that had followed-up at least 20 patients in 2012-2013 and  
27 for all clinics in 2014-2016, the number of clinics reporting their outcomes was lower in  
28 2012-2013 (21 and 23) than in 2014-2016 (70, 64, and 59). However, it is possible to compare  
29 how many clinics had treated, followed-up, and treated at least 20 patients to remission in  
30 2012-2016.  
31  
32  
33  
34  
35  
36  
37  
38  
39

40 Figure 3 shows that more clinics had treated at least 20 patients in 2016 than in 2012.  
41 Whereas the clinics that had treated at least 20 patients in 2012 were selected for having  
42 followed them up, only 45% of these clinics followed-up at least 20 patients in 2016. About  
43 one in three of these clinics had treated at least 20 patients to remission in 2012 compared to  
44 about one in eight in 2016. The results in the other years fall in between the results in 2012  
45 and 2016.  
46  
47  
48  
49  
50  
51  
52  
53  
54

55 --- Please insert Figure 3 about here ---  
56  
57  
58  
59  
60

1  
2  
3 Out of the 33 clinics that had treated at least 20 patients in 2016 (Figure 3, green bar at  
4 the very left), three (9%) had not followed-up any patient, and 21 (64%) had not treated a  
5 single patient to remission. These 21 clinics had treated a total of 857 patients, with a median  
6 (range) of 32 (20-98) patients/clinic.  
7  
8  
9  
10  
11  
12

### 13 **Combined outcomes at clinics that followed-up fewer than 10 patients**

14  
15  
16  
17 Figure 4 shows that amongst the about 2600 patients who were treated annually in 2013-2016,  
18 the number of patients treated at clinics that followed-up fewer than 10 patients increased to  
19 more than 1000 in the last two years. In parallel, the proportion of patients who were  
20 followed-up and treated to remission at these clinics decreased. Fewer than one in ten of the  
21 patients were treated to remission in the final three years. Please note that the values for 2012  
22 include clinics that followed up fewer than 20 patients. Clinics following-up fewer than 10  
23 patients were not reported separately this year.  
24  
25  
26  
27  
28  
29  
30  
31  
32  
33

34 --- Please insert Figure 4 about here ---  
35  
36  
37

### 38 **Published outcomes at Mandometer clinics**

39  
40  
41 Table 2 shows that the proportion of patients in remission at 12 months assessments was at  
42 least 27% and significantly different at the three Mandometer clinics, whose outcomes are  
43 published. Treatment continues after the 12 months at these clinics and the proportion of  
44 patients in remission increases after various, prolonged periods of time. Please note that these  
45 clinics had been operating over various periods of time.  
46  
47  
48  
49  
50  
51  
52  
53  
54  
55  
56  
57  
58  
59  
60

**Table 2.** Proportion of patients in remission at Mandometer clinics.

| Outcome                             | Clinic   |          |       |
|-------------------------------------|----------|----------|-------|
|                                     | Alingsås | Danderyd | Mando |
| Operation (years)                   | 2        | 7        | 18    |
| <u>12 months assessment</u>         |          |          |       |
| Patients in remission               | 13       | 72       | 219   |
| Patients not in remission           | 36       | 107      | 552   |
| Proportion in remission             | 27       | 40*      | 28    |
| <u>Continued treatment (months)</u> |          |          |       |
| Patients in remission               | 19       | 141      | 490   |
| Patients not in remission           | 27       | 27       | 170   |
| Proportion in remission             | 39       | 82       | 68    |

\*P=0.0017 compared to Alingsås and Mando after P=0.0069 (overall difference).

It may be mentioned that the time to remission depends on the diagnosis at admission, with the longest time to remission for patients with anorexia nervosa (8).

### **Outcomes at the three biggest clinics**

SCED had treated about four times more patients annually (median: 715; range: 696-724) than Capio (175; 157-178) and Mando (123; 81-168), and followed-up about the same proportion of patients (43; 32-69%) as Capio (50; 48-65%) and Mando (43; 32-83%). These proportions are similar to the average proportions of follow-up at all clinics over these years (Figure 1).

Figure 5 shows that Mando had treated a bigger proportion of patients to remission than SCED and Capio in 2014-2016. Whilst the rate of remission was relatively stable at on average 36% at Mando over these three years, it decreased from 29% to 16% at SCED and from 30% to 14% at Capio. In 2016, the proportion of patients treated to remission at Mando (35%) was about twice as big as the corresponding proportion at SCED (16%) and Capio (14%).

--- Please insert Figure 5 about here ---

## **DISCUSSION**

### **Patient characteristics, diagnostic procedures, and treatments**

The characteristics of the patients, who have been treated for eating disorders in Sweden, including the proportion of males and children, age and diagnosis, have been relatively stable in recent years and are similar to the characteristics of eating disorders patients in other countries (19). It is worth noting that whilst a minority of the patients were diagnosed with Binge Eating Disorder, that disorder is now the most common eating disorder (20). Although the diagnostic procedures may differ amongst clinics (19), most of the procedures used in Sweden have been developed in other countries. In addition, the treatments used in Sweden,

1  
2  
3 including CBT, psychodynamic therapy, and family therapy, as well as medical and  
4  
5 psychopharmacological interventions aiming at restoring physical and mental health are the  
6  
7 same as those recommended in the guidelines and used in most countries (19,21–26). The  
8  
9 treatment at the Mandometer clinics differs in that an important intervention is the  
10  
11 normalization of eating behaviour using real time visual feedback on how to eat as described  
12  
13 many times and most recently by video (15). The differences and similarities amongst the  
14  
15 Mandometer treatment and CBT have been described in detail recently, including the  
16  
17 differences in outcomes (7).  
18  
19  
20  
21

### 22 **Outcomes in Sweden**

23  
24  
25  
26 About 2600 patients were treated annually at the eating disorders clinics in Sweden in 2012-  
27  
28 2016, fewer than half were followed-up, and the proportion of patients treated to remission  
29  
30 decreased from one in five in 2012 to less than one in seven in 2016. However, remission  
31  
32 rates which are more than three times higher have been publicized nationally. These estimates  
33  
34 were derived by excluding patients lost to follow-up and patients followed-up at clinics that  
35  
36 did not treat patients to remission. In 2016, only four clinics treated 20 patients to remission;  
37  
38 most clinics treated a small number of patients, followed-up a few, and treated only one  
39  
40 patient in ten to remission. Outcomes varied significantly between clinics each year and  
41  
42 within clinics over years. In addition, in 2016 more than half the 33 clinics that had treated on  
43  
44 average 32 patients had failed to treat a single patient to remission; one of these clinics had  
45  
46 treated 98 patients unsuccessfully.  
47  
48  
49  
50  
51

### 52 **Interpretation and comparison with published outcomes**

53  
54  
55  
56 Whilst these findings indicate that the procedures of treatment and follow-up differ amongst  
57  
58 clinics in Sweden, a word of caution seems appropriate. For example, although outcomes  
59  
60

1  
2  
3 were significantly different over years at the biggest clinic (SCED), patients were treated to  
4 remission all years, suggesting that a statistically significant within-clinic variation may be  
5  
6 less significant clinically. However, it seems unlikely that the decrease from a rate of  
7  
8 remission of about 30% in 2014 at this clinic to about half that rate two years later is a matter  
9  
10 of random variation. And the similar decrease in the rate of remission at another clinic in  
11  
12 these years (Capio) suggests that the procedures at these clinics had deteriorated, at least  
13  
14 temporarily.

15  
16  
17  
18  
19  
20  
21 Possible reasons for the variation in outcomes include changes in staffing, training of  
22  
23 staff, patient compliance to treatment, and the physical conditions in the clinics, factors that  
24  
25 affect outcomes in multicenter clinical trials (27). Whilst the “study protocol” of the  
26  
27 multicenter trial aims at reducing the influence of these factors, there is no standard protocol  
28  
29 for the treatment of eating disorders. And although there is agreement that the treatment  
30  
31 guidelines for eating disorders should be followed, this consensus view has not yet improved  
32  
33 outcomes (21–23,25,28–30). For example, an attempt at implementing CBT, which is  
34  
35 recommended in all guidelines, in combination with antidepressant medication for the  
36  
37 treatment of bulimia nervosa in primary care in the U.S. resulted in a 70% dropout rate (31).  
38  
39 A similar effort in general practice in the U.K. found that out of 683 patients with a diagnosis  
40  
41 of bulimia, about half of the 272 patients who entered CBT completed the treatment, and  
42  
43 although those patients improved, they were not free of eating disorders symptoms after  
44  
45 treatment (32). A recent study aiming to implement CBT for anorexia nervosa in general  
46  
47 practice produced similar results. Thus, out of 257 patient referrals, 44 patients started in  
48  
49 treatment and 22 completed the treatment (33), findings that were replicated in another recent  
50  
51 study (34). Compliance is thus a general problem in the treatment of eating disorders, not a  
52  
53 “Swedish” problem, but it can be improved as discussed below.  
54  
55  
56  
57  
58  
59  
60



1  
2  
3 Whether these factors are causally related to the decrease in remission rates in 2015-  
4 2016 remains to be determined. But it may be of some significance that as the number of  
5 patients treated at clinics that treated fewer than ten patients to remission increased, the  
6 proportion of patients followed-up and treated to remission decreased (Figure 4). And when  
7 the number of patients followed-up at all clinics increased in 2015, there was a marked  
8 decrease in the proportion of patient treated to remission (Figures 1 and 2).  
9  
10  
11  
12  
13  
14  
15  
16  
17

18 The Mandometer treatment was developed starting in 1993, a theoretical framework and  
19 preliminary findings were reported in 1996 (14,35). A randomized controlled trial  
20 demonstrated its effectiveness and outcomes for 1428 patients treated at six clinics in four  
21 countries were subsequently reported (8,13). The combined rate of remission at these clinics  
22 was estimated to be about 75% in on average one year of treatment and the rate of relapse was  
23 estimated to be about 10% over five years of follow-up (8). Similar to Riksät, estimates were  
24 done amongst all patients entering treatment. However, far more patients were lost to follow-  
25 up at Riksät's one year time point of follow-up than to Mandometer's procedure of  
26 monitoring patients at three-month intervals throughout treatment and at 1, 2, 3, 6, 9, 12, 18,  
27 24, 36, 48, and 60 months of follow-up (8). Despite the difference, the rate of remission at the  
28 Mando clinic in the Stockholm County Council was on average 33% in 2012-2016 according  
29 to the Riksät calculation, which is about half the estimated published 75% rate of remission  
30 after on average one year of treatment (8). A comprehensive description of all patients,  
31 including those who take a long time to go into remission, is available in the supplementary  
32 files of (8), which report outcomes at three month intervals at all Mando clinics.  
33  
34  
35  
36  
37  
38  
39  
40  
41  
42  
43  
44  
45  
46  
47  
48  
49  
50  
51  
52  
53

54 Average remission rates should be viewed cautiously as outcomes varied between  
55 clinics. Thus, the published rate of remission at 12 months differed significantly at the three  
56 Mandometer clinics, yet it was higher than the average values reported for all clinics in each  
57  
58  
59  
60

1  
2  
3 of the five years in Riksät. Differences in treatment methods between the Mandometer clinics  
4 and the other clinics may explain the differences in outcomes (7) and it is possible that  
5  
6 outcomes will be more consistent at the Mandometer clinics once they have been operating  
7  
8 for a longer period of time. For example, the Alingsås clinic had been treating patients for  
9  
10 only two years and reached a rate of remission of only 39%. The variation in the rate of  
11  
12 remission at 12 months at the Mandometer clinics in Amsterdam (16%), San Diego (52%),  
13  
14 and Melbourne (25%) (8), support previous findings that international cultural and medical  
15  
16 system differences also affect treatment outcomes (36). Thus, patients treated in San Diego  
17  
18 improved rapidly, but they were often prevented from continuing in treatment because of the  
19  
20 financial constraints of their insurance policies (8), a problem that would not affect patients in  
21  
22 Sweden. It should be noted that relatively few patients had been treated at these clinics.  
23  
24  
25  
26  
27  
28  
29

30 Dropout and relapse are significant events in the treatment of eating disorders (7,37,38),  
31 and neither these events, nor remission, should be expected to occur after a predetermined  
32  
33 period of time such as at one year of follow-up as used in Riksät. Also, the precise time for  
34  
35 follow-up is not mentioned. It seems likely that this procedure explains why more than half  
36  
37 the patients were lost to follow-up in Riksät. Practical approaches to survival analysis,  
38  
39 including time-to-event analysis, are long available (18,39) and should be used in studies of  
40  
41 outcomes of eating disorders treatment. The higher level of compliance at the Mandometer  
42  
43 clinics (8) offers support for their value.  
44  
45  
46  
47  
48

49 Considering the difference between outcomes at Mando and the other Swedish clinics,  
50 including the fact that several hundred patients have been treated to remission, and that the  
51  
52 rate of relapse has been reduced to an estimated 10% at the Mando clinics, a randomized  
53  
54 controlled trial comparing outcomes at these clinics may be redundant; an attempt at a  
55  
56 comparison (40), was fraught with problems (8). The major treatment in Swedish clinics is  
57  
58  
59  
60

1  
2  
3 CBT and a detailed analysis showed that the remission rates after CBT are lower than those  
4  
5 after Mandometer treatment (7). Psychodynamic therapy is also used in Swedish clinics,  
6  
7 although outcomes of this therapy are inferior to those of CBT (41). Similarly, the use of  
8  
9 family-based therapies with children in Sweden as in other countries, probably does not  
10  
11 explain the differences in outcomes. Differences in patient characteristics at admission may  
12  
13 contribute to differences in treatment outcomes and the possibility that such differences exist  
14  
15 should be examined, although the published literature indicates that they do not (42). Also,  
16  
17 there are no differences in the Swedish referral system such that more severely ill patients at  
18  
19 one of the clinics might explain differences in outcomes.  
20  
21  
22  
23  
24

### 25 **Implications for policy makers**

26  
27  
28 Overestimations of the outcomes of the treatment for eating disorders in Sweden have been  
29  
30 publicized over several years (4), including the claim that “70% of the patients are ‘cured’  
31  
32 within one year”, which is maintained on Sweden’s National Educational Radio Channel (5).  
33  
34 This is similar to the international claim that CBT is “efficacious for a range of eating  
35  
36 disorder presentations in the short and long-term” (30), publicized as: “Based on a solid  
37  
38 empirical foundation, the transdiagnostic enhanced CBT approach will immediately become  
39  
40 the gold standard for the treatment of eating disorders” (43), and “[the effect of CBT] is the  
41  
42 most dramatic that we have seen in the literature ... [including] the potency ... and the  
43  
44 impressive maintenance of change over the 19-months follow-up” (44). The published  
45  
46 evidence does not support these claims (7,45–47) and evidence that the outcomes of CBT  
47  
48 have been overestimated for the treatment of other disorders is gradually emerging (48,49).  
49  
50 These overstatements have misinformed health policy makers and can now be corrected.  
51  
52  
53  
54  
55  
56

57 The importance of the National Quality Registries in guiding health care policies in  
58  
59 Sweden was recently re-emphasized (50). In order to guide decisions on matters of health  
60

1  
2  
3 care, national and international registries must offer reliable information. Widely publicized  
4  
5 “facts” need to be critically examined. Policy makers should be aware that once ill advised  
6  
7 policies have been established, retrospectively controlling their evidence basis can be  
8  
9 ineffective, and even strengthen the misguided policy (51,52).  
10  
11  
12

### 13 **Acknowledgements**

14  
15  
16  
17 We thank Sara Norring, Riksät, Anna Sandelin, the Centre of Registries Västra Götaland, and  
18  
19 Fredrik Westander and Lale Björne-Fergéus, SALAR, for information on Riksät.  
20  
21  
22

### 23 **Transparency declaration**

24  
25  
26 Södersten affirms that the manuscript is an honest, accurate, and transparent account of the  
27  
28 study being reported; that no important aspects of the study have been omitted; and that any  
29  
30 discrepancies from the study as planned (and, if relevant, registered) have been explained.  
31  
32  
33

### 34 **Ethics approval**

35  
36  
37  
38 The project was approved by the Regional Ethical Review Board of Stockholm (Dnr  
39  
40 2015/456-31).  
41  
42

### 43 **Authors**

44  
45  
46  
47 Södersten examined the registry data in detail over the last two years. He reviewed his  
48  
49 examinations for all authors at regular intervals during the examination period. He is  
50  
51 responsible for the overall content as guarantor and assumes responsibility for all aspects of  
52  
53 the work. All data used for the analysis are included as a supplementary table to this  
54  
55 submission, which all authors are happy to share with other researchers.  
56  
57  
58  
59  
60

1  
2  
3 Brodin is medical statistician and has performed all statistical analyses and reviewed these for  
4  
5 all authors at regular intervals during the examination period.  
6  
7

8  
9 Sjöberg is clinical director of the Mandometer Clinic in Alingsås and responsible for  
10  
11 treatment and data collection and reporting to the registry in 2012-2016.  
12  
13

14  
15 Zandian is clinical quality controller and has been responsible for data collection and  
16  
17 reporting to the registry in 2012-2016.  
18  
19

20  
21 Bergh is clinical director for the Mandometer Clinic in Huddinge and responsible for  
22  
23 treatment at all Mandometer clinics.  
24  
25

26  
27 All authors have seen and reviewed several versions of the manuscript and agreed to its final  
28  
29 version.  
30  
31

32  
33 Södersten is: “the corresponding author and attests that all listed authors meet authorship  
34  
35 criteria and that no others meeting the criteria have been omitted”.  
36  
37

### 38 **Contributorship**

39  
40  
41 Åsa Lundqvist BA of the Mandometer Clinic in Stockholm has been contact person with the  
42  
43 Rikät registry staff over the years 2012-2016. Ms Lundqvist supervised the reporting of data  
44  
45 to the registry and is in charge of the follow-up programme of the Mandometer Clinic.  
46  
47  
48

### 49 **Competing interests**

50  
51  
52 Complete openness concerning financial arrangements is intended here. Brodin, Sjöberg and  
53  
54 Zandian declare that they have no financial interests related to this study. Our research is  
55  
56 carried out at the Karolinska Institute, where Södersten is a professor em. The research is  
57  
58 translated clinically by Mando Group AB, a company started by Södersten and Bergh, who  
59  
60

1  
2  
3 have 47.5% of the stock each. Professor Michael Leon of the University of California at  
4  
5 Irvine has 5%. Mando Group AB contracts with the County Council of Stockholm every fifth  
6  
7 year to treat patients with eating disorders. Mando Groups AB signed its first contract in 1997  
8  
9 with the County Council of Stockholm and, since then, its treatment is one of the standards of  
10  
11 care offered to the citizens of Stockholm. This arrangement is the same as when the County  
12  
13 Council of Stockholm contracts with its own clinics to treat patients with all kinds of disease,  
14  
15 including eating disorders. That is to say, the County Council of Stockholm provides eating-  
16  
17 disorder services to the citizens of Stockholm both through a clinic of its own and through  
18  
19 Mando Group AB. There is a third provider of care for patients with eating disorders in  
20  
21 Stockholm, which is a private clinic. All health care in Sweden is funded through the tax  
22  
23 system; private pay is extremely uncommon. It should be added firstly, that Mando Group AB  
24  
25 is in compliance with the recommendation of the International Committee of Medical Journal  
26  
27 Editors on “Author Responsibilities-Conflicts of Interest”  
28  
29 [http://www.icmje.org/recommendations/browse/roles-and-responsibilities/author-](http://www.icmje.org/recommendations/browse/roles-and-responsibilities/author-responsibilities--conflicts-of-interest.html)  
30  
31 [responsibilities--conflicts-of-interest.html](http://www.icmje.org/recommendations/browse/roles-and-responsibilities/author-responsibilities--conflicts-of-interest.html). Secondly, it should also be added that all profit  
32  
33 that Mando Group AB has made has been re-invested in research and development and that  
34  
35 there have been no dividends to stock owners. All of the above is declared in all manuscript  
36  
37 submissions and thus far, journals have judged it necessary to publish only some of the  
38  
39 details. It seems, however, that the potential ethical problem when scientists translate their  
40  
41 research findings into the clinic in a company is not unlike that which arises when any  
42  
43 scientist, in an academic setting is developing a theory and needs further economic funding  
44  
45 for her/his work and may receive recognition and financial benefits for the work. The  
46  
47 incentive is, in part, economic in this case as well and the ethical “problem” is similar in both  
48  
49 cases. However, the more important incentive is the improvement of the treatment of patients  
50  
51 with eating disorders. We are researchers working in an academic setting and like many other  
52  
53  
54  
55  
56  
57  
58  
59  
60

1  
2  
3 medical research institutes today, the Karolinska Institute encourages scientists to translate  
4 their research into the clinic in companies that aim to generate financial profits to be used for  
5 research and development (see:  
6  
7  
8

9  
10 [http://ki.se.proxy.kib.ki.se/sites/default/files/summary\\_strategy2018.pdf](http://ki.se.proxy.kib.ki.se/sites/default/files/summary_strategy2018.pdf)).  
11  
12

### 13 **Funding**

14  
15  
16  
17 This work was supported by The County Council of Stockholm grant number HNSV 15896,  
18 HSN 1502-0291, project 3252.  
19  
20  
21

### 22 **Role of the sponsor**

23  
24  
25  
26 The sponsor had no influence on the work.  
27  
28

### 29 **Data sharing statement**

30  
31  
32  
33 The data used for this analysis are available in a supplementary table.  
34  
35  
36  
37  
38  
39  
40  
41  
42  
43  
44  
45  
46  
47  
48  
49  
50  
51  
52  
53  
54  
55  
56  
57  
58  
59  
60

## References

1. Swedish Association of Local Authorities and Regions. Swedish National Quality Registries [Internet]. [cited 2018 May 7]. Available from: <http://kvalitetsregister.se/englishpages.2040.html>
2. Government Offices of Sweden. Överenskommelse om stöd till nationella kvalitetsregister under 2018 [Internet]. [cited 2018 May 7]. Available from: <http://www.regeringen.se/overenskommelser-och-avtal/2017/12/nationella-kvalitetsregister/>
3. Swedish Association of Local Authorities and Regions. Vården i Siffror [Internet]. [cited 2018 May 7]. Available from: <https://vardenisiffror.se/>
4. Birgegård A, Norring C, Norring S. National Quality Register for Eating Disorders Treatment [Internet]. [cited 2018 May 7]. Available from: <https://riksat.registercentrum.se/>
5. von Hausswolff-Juhlin Y. Från evidens till praktiska råd [Internet]. [cited 2018 May 7]. Available from: <https://urplay.se/program/203090-ur-samtiden-ny-kunskap-om-atstorningar-fran-evidens-till-praktiska-rad>
6. Linardon J, Wade TD, de la Piedad Garcia X, Brennan L. The efficacy of cognitive-behavioral therapy for eating disorders: A systematic review and meta-analysis. *J Consult Clin Psychol*. 2017 Nov;85(11):1080–94.
7. Södersten P, Bergh C, Leon M, Brodin U, Zandian M. Cognitive behavior therapy for eating disorders versus normalization of eating behavior. *Physiol Behav*. 2017 Mar 16;174:178–90.
8. Bergh C, Callmar M, Danemar S, Hölcke M, Isberg S, Leon M, et al. Effective treatment of eating disorders: Results at multiple sites. *Behav Neurosci*. 2013 Dec;127(6):878–89.
9. Fairburn C, Cooper Z, O'Connor M. Eating disorders examination (16.0D). In C. Fairburn (Ed.), *Cognitive behavior therapy and eating disorders*. New York, N.Y: Guilford Press; 2008.
10. Bohn K, Fairburn CG. Clinical impairment assessment questionnaire (CIA 3.0). In: *Cognitive behavior therapy for eating disorders*. New York, N.Y: Guildford Press; p. 315–7.
11. Aas IHM. Global Assessment of Functioning (GAF): properties and frontier of current knowledge. *Ann Gen Psychiatry*. 2010 May 7;9:20.
12. American Psychiatric Association. *Diagnostic and Statistical Manual of Mental Disorders*. fourth ed. Washington, D.C.: American Psychiatric Association; 1994.
13. Bergh C, Brodin U, Lindberg G, Södersten P. Randomized controlled trial of a treatment for anorexia and bulimia nervosa. *Proc Natl Acad Sci*. 2002 Jul 9;99(14):9486–91.



14. Bergh C, Eklund S, Eriksson M, Lindberg G, Södersten P. A new treatment of anorexia nervosa. *The Lancet*. 1996 Aug 31;348(9027):611–2.
15. Esfandiari M, Papapanagiotou V, Diou C, Zandian M, Nolstam J, Södersten P, et al. Control of eating behavior using a novel feedback system. *J Vis Exp JoVE*. 2018 08;(135).
16. Zandian M, Holmstedt E, Larsson A, Bergh C, Brodin U, Södersten P. Anxiolytic effect of warmth in anorexia nervosa. *Acta Psychiatr Scand*. 2017;135(3):266–7.
17. Kirkwood BR, Sterne JAC. *Essential Medical Statistics*. Blackwell, Oxford; 2003.
18. Tableman M, Kim JS. *Survival Analysis Using S: Analysis of Time-to-Event Data*. Boca Raton, FL: Chapman & Hall/CRC; 2004.
19. Treasure J, Claudino AM, Zucker N. Eating disorders. *The Lancet*. 2010 Feb 19;375(9714):583–93.
20. Erskine HE, Whiteford HA. Epidemiology of binge eating disorder. *Curr Opin Psychiatry*. 2018 Aug 13;
21. af Sandeberg A-M, Birgegård A, Mohlin L, Nordlander Ström C, Norring C, Siverstrand M-L. Regionalt vårdprogram – ätstörningar. [Internet]. [cited 2018 May 7]. Available from: [http://www1.psykiatristod.se/Global/vardprogram\\_fulltext/RV\\_Atstorningar\\_2009\\_updat2010.pdf](http://www1.psykiatristod.se/Global/vardprogram_fulltext/RV_Atstorningar_2009_updat2010.pdf)
22. Hay P, Chinn D, Forbes D, Madden S, Newton R, Sugenor L, et al. Royal Australian and New Zealand College of Psychiatrists clinical practice guidelines for the treatment of eating disorders. *Aust N Z J Psychiatry*. 2014 Nov 1;48(11):977–1008.
23. Hay PP, Bacaltchuk J, Stefano S, Kashyap P. Psychological treatments for bulimia nervosa and bingeing. *Cochrane Database Syst Rev*. 2009 Oct 7;(4):CD000562.
24. Hay P. A systematic review of evidence for psychological treatments in eating disorders: 2005–2012. *Int J Eat Disord*. 2013 Jul 1;46(5):462–9.
25. Zipfel S, Giel KE, Bulik CM, Hay P, Schmidt U. Anorexia nervosa: aetiology, assessment, and treatment. *Lancet Psychiatry*. 2015 Dec;2(12):1099–111.
26. Treasure J, Zipfel S, Micali N, Wade T, Stice E, Claudino A, et al. Anorexia nervosa. *Nat Rev Dis Primer*. 2015 26;1:15074.
27. Guthrie LB, Oken E, Sterne JA, Gillman MW, Patel R, Vilchuck K, et al. Ongoing monitoring of data clustering in multicenter studies. *BMC Med Res Methodol*. 2012 Mar 13;12:29.
28. Allen S, Dalton WT. Treatment of eating disorders in primary care: a systematic review. *J Health Psychol*. 2011 Nov;16(8):1165–76.

- 1
  - 2
  - 3
  - 4
  - 5
  - 6
  - 7
  - 8
  - 9
  - 10
  - 11
  - 12
  - 13
  - 14
  - 15
  - 16
  - 17
  - 18
  - 19
  - 20
  - 21
  - 22
  - 23
  - 24
  - 25
  - 26
  - 27
  - 28
  - 29
  - 30
  - 31
  - 32
  - 33
  - 34
  - 35
  - 36
  - 37
  - 38
  - 39
  - 40
  - 41
  - 42
  - 43
  - 44
  - 45
  - 46
  - 47
  - 48
  - 49
  - 50
  - 51
  - 52
  - 53
  - 54
  - 55
  - 56
  - 57
  - 58
  - 59
  - 60
29. Le Grange D, Hughes EK, Court A, Yeo M, Crosby RD, Sawyer SM. Randomized clinical trial of parent-focused treatment and family-based treatment for adolescent anorexia nervosa. *J Am Acad Child Adolesc Psychiatry*. 2016 Aug;55(8):683–92.
30. Linardon J, Fairburn CG, Fitzsimmons-Craft EE, Wilfley DE, Brennan L. The empirical status of the third-wave behaviour therapies for the treatment of eating disorders: A systematic review. *Clin Psychol Rev*. 2017 Dec;58:125–40.
31. Walsh BT, Fairburn CG, Mickley D, Sysko R, Parides MK. Treatment of bulimia nervosa in a primary care setting. *Am J Psychiatry*. 2004 Mar;161(3):556–61.
32. Knott S, Woodward D, Hoefkens A, Limbert C. Cognitive behaviour therapy for bulimia nervosa and eating disorders not otherwise specified: Translation from randomized controlled trial to a clinical setting. *Behav Cogn Psychother*. 2015 Nov;43(6):641–54.
33. Frostad S, Danielsen YS, Rekkedal GÅ, Jevne C, Dalle Grave R, Rø Ø, et al. Implementation of enhanced cognitive behaviour therapy (CBT-E) for adults with anorexia nervosa in an outpatient eating-disorder unit at a public hospital. *J Eat Disord*. 2018;6:12.
34. Jenkins PE, Morgan C, Houlihan C. Outpatient CBT for underweight patients with eating disorders: Effectiveness within a National Health Service (NHS) Eating Disorders Service. *Behav Cogn Psychother*. 2018 Aug 2;1–13.
35. Bergh C, Södersten P. Anorexia nervosa, self-starvation and the reward of stress. *Nat Med*. 1996 Jan;2(1):21–2.
36. Wright JG, Katz JN, Losina E. Clinical trials in orthopaedics research. Part I. Cultural and practical barriers to randomized trials in orthopaedics. *J Bone Joint Surg Am* [Internet]. 2011 Mar 2 [cited 2018 May 7];93(5). Available from: <https://www.ncbi.nlm.nih.gov/pmc/articles/PMC3043780/>
37. Linardon J, Hindle A, Brennan L. Dropout from cognitive-behavioral therapy for eating disorders: A meta-analysis of randomized, controlled trials. *Int J Eat Disord*. 2018 Mar 1;
38. Berends T, Boonstra N, van Elburg A. Relapse in anorexia nervosa: a systematic review and meta-analysis. *Curr Opin Psychiatry*. 2018 Aug 13;
39. Pocock SJ. *Clinical Trials: A Practical Approach*. First. Chichester West Sussex ; New York: Wiley; 1984. 278 p.
40. van Elburg AA, Hillebrand JJG, Huyser C, Snoek M, Kas MJH, Hoek HW, et al. Mandometer treatment not superior to treatment as usual for anorexia nervosa. *Int J Eat Disord*. 2012 Mar 1;45(2):193–201.
41. Poulsen S, Lunn S, Daniel SIF, Folke S, Mathiesen BB, Katznelson H, et al. A randomized controlled trial of psychoanalytic psychotherapy or cognitive-behavioral therapy for bulimia nervosa. *Am J Psychiatry*. 2014 Jan;171(1):109–16.
42. Södersten P, Bergh C, Leon M, Zandian M. Dopamine and anorexia nervosa. *Neurosci Biobehav Rev*. 2016 Jan;60:26–30.

- 1
- 2
- 3 43. Fairburn CG. *Cognitive Behavior Therapy and Eating Disorders*. New York: The
- 4 Guilford Press; 2008.
- 5
- 6 44. Hollon SD, Wilson GT. Psychoanalysis or cognitive-behavioral therapy for bulimia
- 7 nervosa: the specificity of psychological treatments. *Am J Psychiatry*. 2014
- 8 Jan;171(1):13–6.
- 9
- 10 45. Lampard AM, Sharbanee JM. The cognitive-behavioural theory and treatment of bulimia
- 11 nervosa: An examination of treatment mechanisms and future directions. *Aust Psychol*.
- 12 2015 Feb 1;50(1):6–13.
- 13
- 14 46. Troscianko ET. CBT for eating disorders: A not-yet-success story [Internet]. [cited 2018
- 15 May 8]. Available from: <https://www.psychologytoday.com/us/experts/emily-troscianko>
- 16
- 17 47. Gutiérrez E, Carrera O. Anorexia nervosa treatments and Occam’s razor. *Psychol Med*.
- 18 2018 Jan 25;1–2.
- 19
- 20 48. Christensen H, Mackinnon AJ. Review: computerised CBT improves adult depression in
- 21 the short-term, but its effect may have been overestimated previously. *Evid Based Ment*
- 22 *Health*. 2013 Nov;16(4):119.
- 23
- 24 49. Steinert C, Munder T, Rabung S, Hoyer J, Leichsenring F. Psychodynamic therapy: As
- 25 efficacious as other empirically supported treatments? A meta-analysis testing
- 26 equivalence of outcomes. *Am J Psychiatry*. 2017 01;174(10):943–53.
- 27
- 28 50. Granström E, Hansson J, Sparring V, Brommels M, Nyström ME. Enhancing policy
- 29 implementation to improve healthcare practices: The role and strategies of hybrid
- 30 national-local support structures. *Int J Health Plann Manage*. 2018 Aug 9;
- 31
- 32 51. Lewandowsky S, Ecker UKH, Seifert CM, Schwarz N, Cook J. Misinformation and its
- 33 correction: Continued influence and successful debiasing. *Psychol Sci Public Interest J*
- 34 *Am Psychol Soc*. 2012 Dec;13(3):106–31.
- 35
- 36 52. Fazio LK, Brashier NM, Payne BK, Marsh EJ. Knowledge does not protect against
- 37 illusory truth. *J Exp Psychol Gen*. 2015 Oct;144(5):993–1002.
- 38
- 39
- 40
- 41
- 42
- 43
- 44
- 45
- 46
- 47
- 48
- 49
- 50
- 51
- 52
- 53
- 54
- 55
- 56
- 57
- 58
- 59
- 60

1  
2  
3  
4  
5  
6  
7  
8  
9  
10  
11  
12  
13  
14  
15  
16  
17  
18  
19  
20  
21  
22  
23  
24  
25  
26  
27  
28  
29  
30  
31  
32  
33  
34  
35  
36  
37  
38  
39  
40  
41  
42  
43  
44  
45  
46  
47  
48  
49  
50  
51  
52  
53  
54  
55  
56  
57  
58  
59  
60

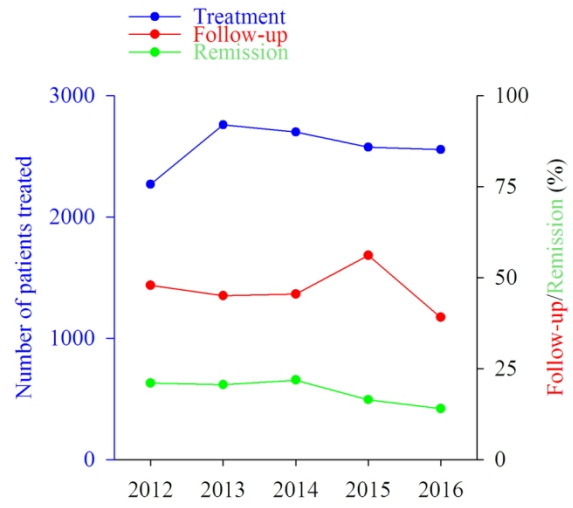

Figure 1. Number of patients treated at all clinics in Sweden and proportion of patients followed-up and in remission one year later. The year on the x-axis indicates the year of follow-up, the corresponding number of patients starting their treatment the year before.

127x180mm (300 x 300 DPI)

1  
2  
3  
4  
5  
6  
7  
8  
9  
10  
11  
12  
13  
14  
15  
16  
17  
18  
19  
20  
21  
22  
23  
24  
25  
26  
27  
28  
29  
30  
31  
32  
33  
34  
35  
36  
37  
38  
39  
40  
41  
42  
43  
44  
45  
46  
47  
48  
49  
50  
51  
52  
53  
54  
55  
56  
57  
58  
59  
60



Figure 2. Proportion of patients in remission at all clinics that followed-up their patients and at clinics that treated at least one patient to remission.

127x180mm (300 x 300 DPI)

1  
2  
3  
4  
5  
6  
7  
8  
9  
10  
11  
12  
13  
14  
15  
16  
17  
18  
19  
20  
21  
22  
23  
24  
25  
26  
27  
28  
29  
30  
31  
32  
33  
34  
35  
36  
37  
38  
39  
40  
41  
42  
43  
44  
45  
46  
47  
48  
49  
50  
51  
52  
53  
54  
55  
56  
57  
58  
59  
60

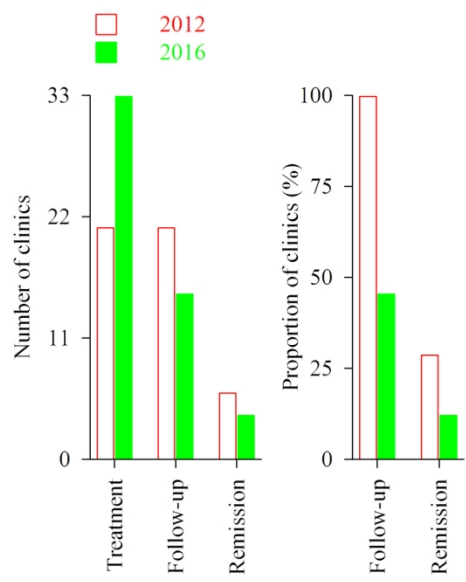

Figure 3. Number of clinics that treated, followed-up, and treated at least 20 patients to remission and proportion of clinics that followed-up and treated at least 20 patients to remission in 2012 and 2016.

127x180mm (300 x 300 DPI)



Figure 4. Number of patients treated at clinics that followed-up fewer than 10 patients (2013-2016) or 20 patients (2012) and proportion of patients followed-up and in remission one year later. The year on the x-axis indicates the year of follow-up, the corresponding number of patients starting their treatment the year before.

89x66mm (300 x 300 DPI)



Figure 5. Proportion of patients treated to remission at the three clinics that treated more patients to remission than any other clinic, the Stockholm Centre for Eating Disorders (SCED), the Capiro Centre for Eating Disorders (Capiro), and the Mandometer Clinic in Stockholm (Mando).

127x180mm (300 x 300 DPI)



**Supplementary table.**

Number of patients treated (Treat), followed-up (F-up), and in remission at follow-up (Rem) at eating disorders clinics in Sweden in 2012-2016. The three clinics in the Stockholm County Council are the Stockholm Centre for Eating Disorders (SCED, A01), Caphio Centre for Eating Disorders (Caphio, A04), and the Mandometer Clinic (Mando (B01). Other is the combination of all clinics that followed-up fewer than 20 patients in 2012-2013 and fewer than 10 patients in 2014-2016.

Whilst most of the cells can be filled in, it is not possible to fill in all cells, because of the procedures of follow-up. The clinics are arranged from the maximal-minimal number of patients treated.

| <b>2012</b>   |              |             |            | <b>2013</b>   |              |             |            | <b>2014</b>   |              |             |            |
|---------------|--------------|-------------|------------|---------------|--------------|-------------|------------|---------------|--------------|-------------|------------|
| <b>Clinic</b> | <b>Treat</b> | <b>F-up</b> | <b>Rem</b> | <b>Clinic</b> | <b>Treat</b> | <b>F-up</b> | <b>Rem</b> | <b>Clinic</b> | <b>Treat</b> | <b>F-up</b> | <b>Rem</b> |
| <b>A01</b>    | 696          | 224         | 131        | <b>A01</b>    | 710          | 305         | 179        | <b>A01</b>    | 705          | 339         | 210        |
| <b>A04</b>    | 157          | 93          | 52         | <b>A04</b>    | 176          | 88          | 49         | <b>A04</b>    | 162          | 77          | 49         |
| <b>B01</b>    | 123          | 53          | 39         | <b>B01</b>    | 168          | 54          | 43         | <b>B01</b>    | 136          | 59          | 53         |
| <b>T01</b>    | 120          | 50          | 21         | <b>T01</b>    | 116          | 39          | 20         | <b>M10</b>    | 105          | 36          | 20         |
| <b>M10</b>    | 107          | 38          | 22         | <b>M10</b>    | 111          | 36          | 22         | <b>T01</b>    | 99           | 46          | 21         |
| <b>U02</b>    | 90           | 23          | 9          | <b>O09</b>    | 89           | 36          | 19         | <b>X02</b>    | 85           | 40          | 22         |
| <b>O09</b>    | 78           | 38          | 16         | <b>E12</b>    | 83           | 41          | 28         | <b>H01</b>    | 82           | 36          | 15         |
| <b>E12</b>    | 66           | 25          | 14         | <b>Å04</b>    | 63           | 35          | 21         | <b>U02</b>    | 78           | 16          | 6          |
| <b>N05</b>    | 49           | 26          | 11         | <b>H01</b>    | 59           | 43          | 18         | <b>E12</b>    | 72           | 38          | 23         |
| <b>R01</b>    | 48           | 33          | 13         | <b>N02</b>    | 58           | 30          | 7          | <b>N07</b>    | 66           | 16          | 3          |
| <b>H01</b>    | 44           | 44          | 12         | <b>O07</b>    | 56           | 35          | 4          | <b>S02</b>    | 63           | 1           | 0          |
| <b>D03</b>    | 40           | 38          | 7          | <b>O03</b>    | 44           | 44          | 6          | <b>O09</b>    | 57           | 27          | 15         |
| <b>K08</b>    | 36           | 24          | 12         | <b>M12</b>    | 42           | 41          | 10         | <b>N02</b>    | 55           | 32          | 15         |
| <b>O03</b>    | 36           | 33          | 8          | <b>N05</b>    | 39           | 26          | 3          | <b>C04</b>    | 52           | 0           | 0          |
| <b>Å04</b>    | 33           | 21          | 7          | <b>N07</b>    | 39           | 21          | 1          | <b>O03</b>    | 52           | 30          | 5          |
| <b>O07</b>    | 31           | 31          | 5          | <b>C03</b>    | 38           | 30          | 13         | <b>W11</b>    | 49           | 11          | 0          |
| <b>W01</b>    | 30           | 28          | 20         | <b>P04</b>    | 33           | 32          | 9          | <b>O07</b>    | 43           | 16          | 2          |
| <b>N02</b>    | 29           | 28          | 1          | <b>W01</b>    | 28           | 28          | 9          | <b>N05</b>    | 40           | 16          | 8          |
| <b>N07</b>    | 29           | 22          | 2          | <b>D03</b>    |              | 12          | 3          | <b>C03</b>    | 39           | 17          | 5          |
| <b>P04</b>    | 26           | 26          | 0          | <b>K08</b>    |              | 13          | 9          | <b>M52</b>    | 39           | 20          | 11         |
| <b>C03</b>    | 21           | 21          | 8          | <b>U02</b>    |              | 12          | 5          | <b>P04</b>    | 37           | 15          | 0          |
| <b>Other</b>  | 378          | 165         | 67         | <b>Z02</b>    |              | 13          | 8          | <b>Å02</b>    | 33           | 27          | 14         |
|               |              |             |            | <b>Å02</b>    |              | 11          | 10         | <b>D03</b>    | 31           | 11          | 0          |
| <b>Sum</b>    | <b>2267</b>  | <b>1084</b> | <b>477</b> | <b>Other</b>  | 806          | 218         | 69         | <b>M03</b>    | 30           | 7           | 0          |
|               |              |             |            |               |              |             |            | <b>Å04</b>    | 30           | 19          | 14         |
|               |              |             |            | <b>Sum</b>    | <b>2758</b>  | <b>1243</b> | <b>566</b> | <b>R01</b>    | 29           | 4           | 0          |
|               |              |             |            |               |              |             |            | <b>Y06</b>    | 29           | 0           | 0          |
|               |              |             |            |               |              |             |            | <b>M12</b>    | 26           | 15          | 7          |
|               |              |             |            |               |              |             |            | <b>W04</b>    | 26           | 8           | 0          |
|               |              |             |            |               |              |             |            | <b>K08</b>    | 25           | 13          | 9          |
|               |              |             |            |               |              |             |            | <b>W01</b>    | 24           | 9           | 0          |
|               |              |             |            |               |              |             |            | <b>B03</b>    | 20           | 4           | 0          |
|               |              |             |            |               |              |             |            | <b>B05</b>    | 19           | 1           | 0          |
|               |              |             |            |               |              |             |            | <b>Z02</b>    | 19           | 10          | 10         |
|               |              |             |            |               |              |             |            | <b>Å12</b>    | 19           | 4           | 0          |
|               |              |             |            |               |              |             |            | <b>D08</b>    | 18           | 10          | 8          |
|               |              |             |            |               |              |             |            | <b>F01</b>    | 17           | 10          | 0          |
|               |              |             |            |               |              |             |            | <b>Y05</b>    | 16           | 3           | 0          |
|               |              |             |            |               |              |             |            | <b>O66</b>    | 15           | 6           | 0          |

1  
2  
3  
4  
5  
6  
7  
8  
9  
10  
11  
12  
13  
14  
15  
16  
17  
18  
19  
20  
21  
22  
23  
24  
25  
26  
27  
28  
29  
30  
31  
32  
33  
34  
35  
36  
37  
38  
39  
40  
41  
42  
43  
44  
45  
46  
47  
48  
49  
50  
51  
52  
53  
54  
55  
56  
57  
58  
59  
60

|              |             |             |            |
|--------------|-------------|-------------|------------|
| <b>E08</b>   | 13          | 6           | 0          |
| <b>F02</b>   | 13          | 12          | 3          |
| <b>M28</b>   | 13          | 7           | 0          |
| <b>Å06</b>   | 11          | 2           | 0          |
| <b>E09</b>   | 9           | 2           | 0          |
| <b>I05</b>   | 9           | 0           | 0          |
| <b>Y08</b>   | 9           | 1           | 0          |
| <b>D14</b>   | 8           | 0           | 0          |
| <b>Z05</b>   | 8           | 0           | 0          |
| <b>G03</b>   | 7           | 5           | 0          |
| <b>E06</b>   | 6           | 0           | 0          |
| <b>E17</b>   | 6           | 4           | 0          |
| <b>D06</b>   | 5           | 0           | 0          |
| <b>I01</b>   | 5           | 0           | 0          |
| <b>Å11</b>   | 5           | 3           | 0          |
| <b>F04</b>   | 4           | 2           | 0          |
| <b>F10</b>   | 4           | 0           | 0          |
| <b>E11</b>   | 3           | 0           | 0          |
| <b>E25</b>   | 3           | 2           | 0          |
| <b>O46</b>   | 3           | 3           | 0          |
| <b>E22</b>   | 2           | 1           | 0          |
| <b>O01</b>   | 2           | 0           | 0          |
| <b>B10</b>   | 1           | 0           | 0          |
| <b>F07</b>   | 1           | 0           | 0          |
| <b>F08</b>   | 1           | 0           | 0          |
| <b>K09</b>   | 1           | 0           | 0          |
| <b>O67</b>   | 1           | 0           | 0          |
| <b>W13</b>   | 1           | 0           | 0          |
| <b>Y07</b>   | 1           | 0           | 0          |
| <b>Y10</b>   | 1           | 0           | 0          |
| <b>Y11</b>   | 1           | 0           | 0          |
| <b>I01</b>   | 0           | 0           | 0          |
| <b>M37</b>   | 0           | 0           | 0          |
| <b>M57</b>   | 0           | 0           | 0          |
| <b>O27</b>   | 0           | 0           | 0          |
| <b>O31</b>   | 0           | 0           | 0          |
| <b>O35</b>   | 0           | 0           | 0          |
| <b>O36</b>   | 0           | 0           | 0          |
| <b>O37</b>   | 0           | 0           | 0          |
| <b>O50</b>   | 0           | 0           | 0          |
| <b>O72</b>   | 0           | 0           | 0          |
| <b>Other</b> |             | 128         | 41         |
| <b>Sum</b>   | <b>2699</b> | <b>1098</b> | <b>548</b> |

**2015**

| Clinic | Treat | F-up | Rem |
|--------|-------|------|-----|
| A01    | 734   | 505  | 182 |
| A04    | 175   | 113  | 33  |
| O09    | 109   | 13   | 0   |
| T01    | 106   | 36   | 0   |
| B01    | 95    | 79   | 32  |
| M10    | 95    | 42   | 15  |
| H01    | 93    | 51   | 4   |
| X02    | 83    | 7    | 0   |
| S02    | 73    | 37   | 0   |
| U02    | 73    | 14   | 0   |
| N07    | 71    | 20   | 0   |
| E12    | 59    | 49   | 20  |
| N02    | 47    | 41   | 6   |
| N05    | 45    | 5    | 0   |
| M52    | 40    | 7    | 3   |
| C04    | 36    | 0    | 0   |
| O07    | 35    | 31   | 3   |
| M03    | 34    | 5    | 0   |
| Å04    | 34    | 14   | 7   |
| D03    | 31    | 18   | 0   |
| M12    | 31    | 9    | 0   |
| O03    | 29    | 21   | 10  |
| C03    | 26    | 13   | 11  |
| Z02    | 26    | 13   | 9   |
| M57    | 25    | 0    | 0   |
| K08    | 23    | 16   | 0   |
| B03    | 22    | 14   | 0   |
| Å02    | 22    | 11   | 0   |
| E08    | 18    | 10   | 0   |
| O27    | 17    | 17   | 7   |
| P04    | 17    | 0    | 0   |
| W01    | 17    | 17   | 5   |
| Y06    | 15    | 7    | 0   |
| D08    | 14    | 2    | 0   |
| G03    | 14    | 6    | 0   |
| I05    | 13    | 0    | 0   |
| O66    | 13    | 13   | 0   |
| R01    | 13    | 6    | 0   |
| Y05    | 13    | 2    | 0   |

**2016**

| Clinic | Treat | F-up | Rem |
|--------|-------|------|-----|
| A01    | 715   | 298  | 117 |
| A04    | 178   | 95   | 24  |
| T01    | 98    | 20   | 0   |
| O09    | 85    | 40   | 0   |
| X02    | 82    | 49   | 0   |
| B01    | 81    | 43   | 28  |
| O27    | 80    | 52   | 7   |
| H01    | 77    | 23   | 6   |
| M10    | 75    | 17   | 6   |
| E12    | 67    | 35   | 7   |
| C03    | 64    | 30   | 20  |
| N07    | 64    | 1    | 0   |
| U02    | 63    | 0    | 0   |
| C04    | 49    | 0    | 0   |
| O07    | 49    | 28   | 5   |
| W11    | 44    | 2    | 0   |
| N02    | 40    | 13   | 0   |
| M52    | 36    | 34   | 0   |
| N05    | 35    | 26   | 0   |
| O03    | 35    | 24   | 8   |
| S02    | 32    | 7    | 0   |
| W01    | 31    | 29   | 11  |
| Y06    | 31    | 5    | 0   |
| Å04    | 30    | 12   | 10  |
| M03    | 26    | 1    | 0   |
| B03    | 23    | 1    | 0   |
| D03    | 23    | 15   | 0   |
| K08    | 23    | 13   | 0   |
| L01    | 21    | 0    | 0   |
| M37    | 21    | 1    | 0   |
| Z02    | 21    | 6    | 0   |
| E17    | 20    | 12   | 0   |
| Å12    | 20    | 1    | 0   |
| M28    | 19    | 7    | 0   |
| R01    | 19    | 5    | 0   |
| Å02    | 19    | 5    | 0   |
| W04    | 17    | 6    | 0   |
| O66    | 15    | 15   | 5   |
| Y05    | 15    | 2    | 0   |

|    |              |             |             |            |              |             |            |            |
|----|--------------|-------------|-------------|------------|--------------|-------------|------------|------------|
| 1  |              |             |             |            |              |             |            |            |
| 2  | <b>D14</b>   | 12          | 0           | 0          | <b>F01</b>   | 13          | 0          | 0          |
| 3  | <b>W11</b>   | 12          | 0           | 0          | <b>E09</b>   | 11          | 0          | 0          |
| 4  | <b>E17</b>   | 10          | 6           | 0          | <b>M12</b>   | 10          | 3          | 0          |
| 5  | <b>W04</b>   | 10          | 4           | 0          | <b>O72</b>   | 9           | 1          | 0          |
| 6  | <b>Å06</b>   | 10          | 8           | 0          | <b>B05</b>   | 7           | 3          | 0          |
| 7  | <b>Å12</b>   | 10          | 2           | 0          | <b>E08</b>   | 7           | 3          | 0          |
| 8  | <b>E09</b>   | 9           | 1           | 0          | <b>I05</b>   | 7           | 0          | 0          |
| 9  | <b>B05</b>   | 7           | 2           | 0          | <b>G03</b>   | 6           | 2          | 0          |
| 10 | <b>L01</b>   | 7           | 0           | 0          | <b>Z05</b>   | 6           | 0          | 0          |
| 11 | <b>M28</b>   | 7           | 1           | 0          | <b>Å06</b>   | 6           | 4          | 0          |
| 12 | <b>Y08</b>   | 6           | 1           | 0          | <b>D08</b>   | 5           | 4          | 0          |
| 13 | <b>E06</b>   | 5           | 0           | 0          | <b>E06</b>   | 5           | 0          | 0          |
| 14 | <b>F02</b>   | 5           | 0           | 0          | <b>I02</b>   | 5           | 2          | 0          |
| 15 | <b>Å11</b>   | 5           | 0           | 0          | <b>M57</b>   | 5           | 0          | 0          |
| 16 | <b>I02</b>   | 4           | 1           | 0          | <b>Y08</b>   | 3           | 1          | 0          |
| 17 | <b>M37</b>   | 4           | 4           | 0          | <b>F04</b>   | 2           | 2          | 0          |
| 18 | <b>O72</b>   | 4           | 1           | 0          | <b>O71</b>   | 2           | 0          | 0          |
| 19 | <b>D06</b>   | 2           | 0           | 0          | <b>E22</b>   | 1           | 0          | 0          |
| 20 | <b>F01</b>   | 2           | 2           | 0          | <b>Y11</b>   | 1           | 0          | 0          |
| 21 | <b>F10</b>   | 2           | 0           | 0          | <b>Å11</b>   | 1           | 0          | 0          |
| 22 | <b>Y11</b>   | 2           | 0           | 0          | <b>B10</b>   | 0           | 0          | 0          |
| 23 | <b>B10</b>   | 1           | 0           | 0          | <b>D06</b>   | 0           | 0          | 0          |
| 24 | <b>E25</b>   | 1           | 0           | 0          | <b>D14</b>   | 0           | 0          | 0          |
| 25 | <b>F04</b>   | 1           | 0           | 0          | <b>E25</b>   | 0           | 0          | 0          |
| 26 | <b>Z05</b>   | 1           | 0           | 0          | <b>F02</b>   | 0           | 0          | 0          |
| 27 | <b>E11</b>   | 0           | 0           | 0          | <b>F10</b>   | 0           | 0          | 0          |
| 28 | <b>E22</b>   | 0           | 0           | 0          | <b>P04</b>   | 0           | 0          | 0          |
| 29 | <b>F07</b>   | 0           | 0           | 0          | <b>E11</b>   | 0           | 0          | 0          |
| 30 | <b>F08</b>   | 0           | 0           | 0          | <b>F07</b>   | 0           | 0          | 0          |
| 31 | <b>K09</b>   | 0           | 0           | 0          | <b>F08</b>   | 0           | 0          | 0          |
| 32 | <b>O01</b>   | 0           | 0           | 0          | <b>K09</b>   | 0           | 0          | 0          |
| 33 | <b>O46</b>   | 0           | 0           | 0          | <b>O01</b>   | 0           | 0          | 0          |
| 34 | <b>O67</b>   | 0           | 0           | 0          | <b>O46</b>   | 0           | 0          | 0          |
| 35 | <b>O71</b>   | 0           | 0           | 0          | <b>O67</b>   | 0           | 0          | 0          |
| 36 | <b>W13</b>   | 0           | 0           | 0          | <b>W13</b>   | 0           | 0          | 0          |
| 37 | <b>Y07</b>   | 0           | 0           | 0          | <b>Y07</b>   | 0           | 0          | 0          |
| 38 | <b>Y10</b>   | 0           | 0           | 0          | <b>Y10</b>   | 0           | 0          | 0          |
| 39 | <b>Other</b> |             | 147         | 76         | <b>Other</b> |             |            | 104        |
| 40 |              |             |             |            |              |             |            |            |
| 41 | <b>Sum</b>   | <b>2575</b> | <b>1444</b> | <b>423</b> | <b>Sum</b>   | <b>2555</b> | <b>998</b> | <b>358</b> |
| 42 |              |             |             |            |              |             |            |            |
| 43 |              |             |             |            |              |             |            |            |
| 44 |              |             |             |            |              |             |            |            |
| 45 |              |             |             |            |              |             |            |            |
| 46 |              |             |             |            |              |             |            |            |
| 47 |              |             |             |            |              |             |            |            |
| 48 |              |             |             |            |              |             |            |            |
| 49 |              |             |             |            |              |             |            |            |
| 50 |              |             |             |            |              |             |            |            |
| 51 |              |             |             |            |              |             |            |            |
| 52 |              |             |             |            |              |             |            |            |
| 53 |              |             |             |            |              |             |            |            |
| 54 |              |             |             |            |              |             |            |            |
| 55 |              |             |             |            |              |             |            |            |
| 56 |              |             |             |            |              |             |            |            |
| 57 |              |             |             |            |              |             |            |            |
| 58 |              |             |             |            |              |             |            |            |
| 59 |              |             |             |            |              |             |            |            |
| 60 |              |             |             |            |              |             |            |            |

**STROBE 2007 (v4) Statement—Checklist of items that should be included in reports of *cohort studies***

| Section/Topic                | Item # | Recommendation                                                                                                                                                                       | Reported on page # |
|------------------------------|--------|--------------------------------------------------------------------------------------------------------------------------------------------------------------------------------------|--------------------|
| Title and abstract           | 1      | (a) Indicate the study's design with a commonly used term in the title or the abstract                                                                                               | 1                  |
|                              |        | (b) Provide in the abstract an informative and balanced summary of what was done and what was found                                                                                  | 2-3                |
| <b>Introduction</b>          |        |                                                                                                                                                                                      |                    |
| Background/rationale         | 2      | Explain the scientific background and rationale for the investigation being reported                                                                                                 | 5                  |
| Objectives                   | 3      | State specific objectives, including any prespecified hypotheses                                                                                                                     | 5-6                |
| <b>Methods</b>               |        |                                                                                                                                                                                      |                    |
| Study design                 | 4      | Present key elements of study design early in the paper                                                                                                                              | 8-10               |
| Setting                      | 5      | Describe the setting, locations, and relevant dates, including periods of recruitment, exposure, follow-up, and data collection                                                      | 5, 6, 8, 9         |
| Participants                 | 6      | (a) Give the eligibility criteria, and the sources and methods of selection of participants. Describe methods of follow-up                                                           | 6, 7, 8            |
|                              |        | (b) For matched studies, give matching criteria and number of exposed and unexposed                                                                                                  |                    |
| Variables                    | 7      | Clearly define all outcomes, exposures, predictors, potential confounders, and effect modifiers. Give diagnostic criteria, if applicable                                             | 7                  |
| Data sources/<br>measurement | 8*     | For each variable of interest, give sources of data and details of methods of assessment (measurement). Describe comparability of assessment methods if there is more than one group | 5, 6,7             |
| Bias                         | 9      | Describe any efforts to address potential sources of bias                                                                                                                            |                    |
| Study size                   | 10     | Explain how the study size was arrived at                                                                                                                                            | 6                  |
| Quantitative variables       | 11     | Explain how quantitative variables were handled in the analyses. If applicable, describe which groupings were chosen and why                                                         | 8, 9               |
| Statistical methods          | 12     | (a) Describe all statistical methods, including those used to control for confounding                                                                                                | 8, 9               |
|                              |        | (b) Describe any methods used to examine subgroups and interactions                                                                                                                  |                    |
|                              |        | (c) Explain how missing data were addressed                                                                                                                                          | 8, 9               |
|                              |        | (d) If applicable, explain how loss to follow-up was addressed                                                                                                                       |                    |
|                              |        | (e) Describe any sensitivity analyses                                                                                                                                                |                    |
| <b>Results</b>               |        |                                                                                                                                                                                      |                    |

|                          |     |                                                                                                                                                                                                                                                                                                                                                                                                               |                      |
|--------------------------|-----|---------------------------------------------------------------------------------------------------------------------------------------------------------------------------------------------------------------------------------------------------------------------------------------------------------------------------------------------------------------------------------------------------------------|----------------------|
| Participants             | 13* | (a) Report numbers of individuals at each stage of study—eg numbers potentially eligible, examined for eligibility, confirmed eligible, included in the study, completing follow-up, and analysed<br>(b) Give reasons for non-participation at each stage<br>(c) Consider use of a flow diagram                                                                                                               | 10                   |
| Descriptive data         | 14* | (a) Give characteristics of study participants (eg demographic, clinical, social) and information on exposures and potential confounders<br>(b) Indicate number of participants with missing data for each variable of interest<br>(c) Summarise follow-up time (eg, average and total amount)                                                                                                                | 10, 11<br>11, 13, 14 |
| Outcome data             | 15* | Report numbers of outcome events or summary measures over time                                                                                                                                                                                                                                                                                                                                                | 11-14                |
| Main results             | 16  | (a) Give unadjusted estimates and, if applicable, confounder-adjusted estimates and their precision (eg, 95% confidence interval). Make clear which confounders were adjusted for and why they were included<br>(b) Report category boundaries when continuous variables were categorized<br>(c) If relevant, consider translating estimates of relative risk into absolute risk for a meaningful time period |                      |
| Other analyses           | 17  | Report other analyses done—eg analyses of subgroups and interactions, and sensitivity analyses                                                                                                                                                                                                                                                                                                                |                      |
| <b>Discussion</b>        |     |                                                                                                                                                                                                                                                                                                                                                                                                               |                      |
| Key results              | 18  | Summarise key results with reference to study objectives                                                                                                                                                                                                                                                                                                                                                      | 16                   |
| <b>Limitations</b>       |     |                                                                                                                                                                                                                                                                                                                                                                                                               |                      |
| Interpretation           | 20  | Give a cautious overall interpretation of results considering objectives, limitations, multiplicity of analyses, results from similar studies, and other relevant evidence                                                                                                                                                                                                                                    | 16, 18               |
| Generalisability         | 21  | Discuss the generalisability (external validity) of the study results                                                                                                                                                                                                                                                                                                                                         | 19, 20               |
| <b>Other information</b> |     |                                                                                                                                                                                                                                                                                                                                                                                                               |                      |
| Funding                  | 22  | Give the source of funding and the role of the funders for the present study and, if applicable, for the original study on which the present article is based                                                                                                                                                                                                                                                 | 23, 24               |

\*Give information separately for cases and controls in case-control studies and, if applicable, for exposed and unexposed groups in cohort and cross-sectional studies.

**Note:** An Explanation and Elaboration article discusses each checklist item and gives methodological background and published examples of transparent reporting. The STROBE checklist is best used in conjunction with this article (freely available on the Web sites of PLoS Medicine at <http://www.plosmedicine.org/>, Annals of Internal Medicine at <http://www.annals.org/>, and Epidemiology at <http://www.epidem.com/>). Information on the STROBE Initiative is available at [www.strobe-statement.org](http://www.strobe-statement.org).

# BMJ Open

## Treatment Outcomes for Eating Disorders in Sweden: data from the National Quality Registry

|                                 |                                                                                                                                                                                                      |
|---------------------------------|------------------------------------------------------------------------------------------------------------------------------------------------------------------------------------------------------|
| Journal:                        | <i>BMJ Open</i>                                                                                                                                                                                      |
| Manuscript ID                   | bmjopen-2018-024179.R4                                                                                                                                                                               |
| Article Type:                   | Research                                                                                                                                                                                             |
| Date Submitted by the Author:   | 28-Nov-2018                                                                                                                                                                                          |
| Complete List of Authors:       | Södersten, Per; Karolinska Institutet<br>Brodin, Ulf; Karolinska Institutet,<br>Sjöberg, Jennie; Mandometer Clinic<br>Zandian, Modjtaba; Karolinska Institutet<br>Bergh, Cecilia; Mandometer Clinic, |
| <b>Primary Subject Heading</b>: | Public health                                                                                                                                                                                        |
| Secondary Subject Heading:      | Health policy                                                                                                                                                                                        |
| Keywords:                       | Health policy < HEALTH SERVICES ADMINISTRATION & MANAGEMENT, PUBLIC HEALTH, STATISTICS & RESEARCH METHODS                                                                                            |
|                                 |                                                                                                                                                                                                      |

SCHOLARONE™  
Manuscripts

1  
2  
3 **Treatment Outcomes for Eating Disorders in Sweden. Data from the National Quality**  
4  
5 **Registry**  
6

7  
8  
9 Per Södersten, Ulf Brodin, Jennie Sjöberg, Modjtaba Zandian, Cecilia Bergh  
10

11  
12 Department of Neurobiology, Care Sciences and Society, Karolinska Institutet, Mandometer  
13  
14 Clinic, Novum, S-141 04 Huddinge, Sweden  
15  
16

17  
18  
19  
20  
21 Per Södersten professor em. Email: [per.sodersten@ki.se](mailto:per.sodersten@ki.se)  
22

23  
24  
25 Ulf Brodin PhD medical statistician em. Email: [ulf.brodin@ki.se](mailto:ulf.brodin@ki.se)  
26

27  
28 Jennie Sjöberg RN clinical director. Email: [jennie.sjoberg@mando.se](mailto:jennie.sjoberg@mando.se)  
29

30  
31 Modjtaba Zandian PhD quality controller. Email: [modjtaba.zandin@ki.se](mailto:modjtaba.zandin@ki.se)  
32

33  
34  
35 Cecilia Bergh PhD clinical director. Email: [cecilia.bergh@mando.se](mailto:cecilia.bergh@mando.se)  
36

37  
38  
39 4367 words excluding abstract, strengths and limitations, references, acknowledgements, and  
40  
41 figure legends  
42

43 52 references  
44

45 5 figures  
46

47 2 tables  
48  
49

50  
51  
52  
53  
54  
55  
56  
57  
58 Correspondence to: Per Södersten [per.sodersten@ki.se](mailto:per.sodersten@ki.se)  
59  
60



## Abstract

**Objective** To report the outcomes of eating disorders treatment in Sweden in 2012-2016.

**Design** The number of patients treated and the number of patients not fulfilling an eating disorders diagnosis (remission) at one year of follow-up at the clinics listed in the National Quality Registry for Eating Disorders Treatment were analyzed. The published outcomes at three clinics, that used survival analysis to estimate outcomes, were compared with their outcomes in the registry. Outcomes at the three biggest clinics were compared.

**Setting** All eating disorders clinics.

**Participants** All patients treated at eating disorders clinics.

**Intervention** Cognitive behavioural therapy at most clinics and normalization of eating behaviour at the three clinics with published outcomes.

**Outcome measure** Proportion of patients in remission.

**Results** About 2600 patients were treated annually, fewer than half were followed-up, and remission rates decreased from 21% in 2014 to 14% in 2016. Outcomes, which differed amongst clinics and within clinics over time, have been publically overestimated by excluding patients lost to follow-up. The published estimated rate of remission at three clinics that treated 1200 patients in 1993-2011 was 27, 28, and 40% at one year of follow-up. The average rate of remission over the three last years at the biggest of these clinics was 36%, but decreased from 29 and 30% to 16 and 14% at the two other of the biggest clinics.

**Conclusions** With more than half the patients lost to follow-up and no data on relapse in the National Quality Registry, it is difficult to estimate the effects of eating disorders treatment in

1  
2  
3 Sweden. Analysis of time to clinically significant events, including an extended period of  
4  
5 follow-up, has improved the quality of the estimates at three clinics. Overestimation of  
6  
7 remission rates has misled health care policies. The effect of eating disorders treatment has  
8  
9 also been overestimated internationally.  
10  
11  
12  
13  
14  
15  
16  
17  
18  
19  
20  
21  
22  
23  
24  
25  
26  
27  
28  
29  
30  
31  
32  
33  
34  
35  
36  
37  
38  
39  
40  
41  
42  
43  
44  
45  
46  
47  
48  
49  
50  
51  
52  
53  
54  
55  
56  
57  
58  
59  
60

For peer review only

### Strengths and limitations of this study

- This study has the strength of analyzing all patients treated, followed-up, and treated to remission at all eating disorders clinics over five years in Sweden.
- These outcomes are available in the National Quality Registry for Eating Disorders Treatment but have not been published in the scientific literature.
- Three clinics have published outcomes at three-month intervals making it possible to compare these outcomes with their outcomes in the registry.
- The study has the strength of showing that a time-to-event analysis improves compliance, facilitating estimation of outcomes.
- It is a limitation that whereas outcomes in the registry covered the years 2012-2016, the published outcomes at the three clinics covered the years 1993-2011.

## INTRODUCTION

The National Quality Registries in Sweden have been developed starting in the 1970s and today there are about 100 registries, covering virtually all kinds of disease (1). The Swedish Association of Local Authorities and Regions (SALAR) and the Swedish Government recently agreed to strengthen the registries financially, pointing to their key role in the development of all aspects of health care, improving the quality of care, facilitating research, including international comparisons of outcomes, guiding health care policies, and making it possible for anyone to compare the outcomes of treatment at individual clinics (1,2). Indeed, the SALAR has a website for such comparisons (3).

The Swedish National Quality Registry for Eating Disorders Treatment, Riksät, was established in 1999 and has published 11 reports, written in Swedish, in 2001-2016 (4). Following the aims of the registries, the objective of Riksät is to “document the outcome of treatment” (quote from the first report in 2001). Thus, the important measures are the number of patients treated and the number of patients in remission at follow-up. These numbers are listed in Riksät but have not been analyzed and reported in the scientific literature. The first aim of the present study is to examine the rate of remission at all eating disorders clinics in Sweden.

The results in Riksät have been publicized nationally as demonstrating increasing rates of remission over the years to 56% in 2015 and that “70% of the patients are ‘cured’ within one year” (4,5). Because these outcomes are better than the outcomes reported in the scientific literature (6,7), the second aim of this study is to examine their evidence basis.

There are three clinics in Sweden, that have published outcomes (8). Because these clinics (Mandometer Clinics) also report to Riksät it is possible to compare their published

1  
2  
3 outcomes with their outcomes in Riksät. The biggest of the three Mandometer clinics is the  
4 clinic in the County Council of Stockholm (Mando). The third aim of this study is to compare  
5 the outcomes at Mando with the outcomes at the two other of the biggest clinics in Sweden,  
6 the Stockholm Centre for Eating Disorders (SCED) and the Capio Centre for Eating Disorders  
7 (Capio).  
8  
9

10  
11  
12  
13  
14  
15  
16 The fourth aim of this study is to call the attention of policy makers to the fact that  
17 outcomes of eating disorders treatment have been overestimated not only in Sweden but in  
18 other countries as well.  
19  
20  
21  
22

## 23 **METHODS**

### 24 **Patients and diagnostic procedures**

25  
26  
27 Riksät lists the number of patients entering treatment each year and the number of patients  
28 followed-up one year later, although the exact time of follow-up is not mentioned. More than  
29 90% of the patients entering treatment at the specialist clinics are listed in the registry, but  
30 patients that are treated at general psychiatric units may not be listed. Whilst there is no  
31 information on how many these patients might be, most patients treated are listed in the  
32 registry. There is no information on long term outcome, including relapse.  
33  
34  
35  
36  
37  
38  
39  
40  
41  
42  
43  
44

45  
46 At the beginning of treatment and at follow-up the patients completed the Eating  
47 Disorders Examination Questionnaire (EDE-Q), which measures eating disorders symptoms  
48 (9), and the Clinical Impairment Assessment (CIA), which measures psychosocial functioning  
49 as a consequence of the eating disorder (10). The EDE-Q was used for patients older than 10  
50 years and the CIA was used for patients older than 18 years. A semistructured interview was  
51 used for children and adults to determine overall psychiatric symptoms and social functioning  
52 (see e.g., (11)). Using these procedures, the patients were diagnosed with Anorexia Nervosa,  
53  
54  
55  
56  
57  
58  
59  
60

1  
2  
3 Bulimia Nervosa, Eating Disorder Not Otherwise Specified, or Binge Eating Disorder relying  
4 on the criteria in the Diagnostic and Statistical Manual of Mental Disorders (DSM-IV) (12).  
5  
6 Patients who no longer fulfilled the diagnostic criteria for an eating disorder were listed as in  
7  
8 remission. About 4-5% of the patients in the yearly reports had been treated before when  
9  
10 entering treatment.  
11  
12  
13  
14

15  
16 Riksät reports changes in the patients' social functioning and their experiences of the  
17  
18 treatment, and these secondary measures improve in parallel as patients go into remission but  
19  
20 will not be considered in this analysis.  
21  
22

23  
24 Whilst Riksät thus includes two time points for assessment, the Mandometer clinics  
25  
26 have developed a treatment in which the patients are assessed at three-month intervals and  
27  
28 followed-up 1, 2, 3, 6, 9, 12, 18, 24, 36, 48, and 60 months after remission. The procedures,  
29  
30 including the criteria for inclusion, exclusion, and remission were published in 2002 (13), and  
31  
32 have been re-published many times (e.g., (8)); another description may be redundant. The  
33  
34 Mandometer clinics also report their outcomes to Riksät.  
35  
36  
37

## 38 39 **Treatments**

40  
41  
42 The 2012-2014 Riksät reports did not specify the treatments used beyond mentioning that  
43  
44 these were guided by "the principles of cognitive behavioural therapy" (CBT) and that they  
45  
46 could be used with individual patients or with groups of patients. Medical intervention was  
47  
48 used for monitoring and restoring physical health and psychopharmacology was also used,  
49  
50 absence of evidence of their efficiency was pointed out. The 2015-2016 reports provide  
51  
52 details on treatments. Thus, CBT was used with on average 52% of the children and with 72%  
53  
54 of the adults, psychodynamic therapy was used with on average 21% of the children and with  
55  
56 24% of the adults, and family-based therapies were used with on average 38% of the children.  
57  
58  
59  
60

1  
2  
3 The treatment developed at the Mandometer clinics was described in 1996 (14), re-published  
4 some years on (8,13), and because it has since been described in several other papers, another  
5 description may be redundant. Suffice it to say that an important intervention is teaching  
6 patients how to eat normally using real time visual feedback on how much food to eat and  
7 how quickly to eat it. A video of how this method works was published recently (15). In  
8 addition, the patients are provided with warmth, that exerts an anxiolytic effect in 30 minutes  
9 (16), their physical activity is reduced, and they are assisted in restarting their social  
10 interactions (13). Interestingly, re-establishing normal eating behaviour is also the most  
11 important intervention in CBT, although it is not clear how this is achieved (7).

### 25 **Description of outcomes**

26  
27  
28 Initially, Riksät reported the combined outcomes at the clinics across regions in Sweden, the  
29 reports published in 2009 and 2010 were incomplete, and no report was published in 2011.  
30 However, the outcomes at individual clinics were reported in 2012-2016. The number of  
31 patients treated at each clinic and the proportion of patients who were followed-up are listed  
32 in one set of tables in these reports. The number and the proportion of patients in remission at  
33 follow-up are listed in another set of tables. These numbers have been combined into one  
34 table (supplementary table) and used in the analysis.

### 45 **Combined outcomes at all clinics**

46  
47  
48 The numbers of patients treated, followed-up, and treated to remission have been summarized  
49 for all clinics. The number of patients in remission has been related to the number of patients  
50 treated as well as to the number of patients followed-up in an attempt to explain the high  
51 remission rates publicized in Sweden.

1  
2  
3 If the treatment and the follow-up assessments are about the same at all clinics, the  
4 probability for remission should be the same in all clinics. This hypothesis, which can be  
5 formalized as:  $H_0: P_i(\text{Remission}) = P_0(\text{Remission})$  for all clinics,  $i=1, 2, 3, \dots n$ , was tested  
6 using a test for homogeneity of the data (17).  
7  
8  
9  
10  
11  
12

13 In 2012-2013 Riksät listed the number of clinics that treated and followed-up at least 20  
14 patients. The number of patients treated to remission at these clinics was listed in 2012, but in  
15 2013 the number of patients treated to remission included clinics that had followed-up at least  
16 10 children or 10 adult patients. In 2014-2016 the number of patients treated, followed-up,  
17 and treated to remission was listed for all clinics. Using these data (supplementary table), the  
18 number of clinics following-up at least 20 patients have been analyzed. Outcomes at clinics  
19 following-up fewer than 10 patients have also been analyzed.  
20  
21  
22  
23  
24  
25  
26  
27  
28  
29

### 30 **Published outcomes at Mandometer clinics**

31  
32  
33  
34 Mandometer clinics have published the outcomes of 1428 patients treated at six clinics in four  
35 countries over various periods of time in 1993-2011, and these data are available in the  
36 supplementary files of (8). The three Swedish clinics, in Alingsås, Danderyd, and Huddinge,  
37 treated 1200 of these patients. The clinic in Huddinge, within the Stockholm County Council,  
38 is the oldest clinic and is referred to as Mando in this analysis. The probability of going into  
39 remission over consecutive three-month intervals up to 12 months at these clinics was  
40 estimated using a life-table approach to survival analysis (18). The rate of failure amongst  
41 censored patients was estimated to be 20%, yielding a conservative estimate of treatment  
42 outcomes. This analysis allows comparison between these published outcomes and the  
43 outcomes for the same clinics listed in Riksät.  
44  
45  
46  
47  
48  
49  
50  
51  
52  
53  
54  
55  
56  
57

### 58 **Outcomes at individual clinics**



Outcomes were compared amongst SCED, Capio, and Mando.

## Patient and public involvement

This study is an analysis of patient data in a registry and those patients did not participate in the analysis. The results will be openly available at mandometer.com.

## RESULTS

### Patient characteristics

The characteristics of the patients at the start of treatment were stable over all years and measures of variability are therefore not included. The average proportion of males was 4.6%, the average proportion of children and adolescents, who were <18 years old, was 29%. The age, obviously, was variable and the average mean (SD) age of all patients was 23.1 (8.9) years. The proportion of the various eating disorders diagnoses was also stable over the years and average values are presented in Table 1.

**Table 1.** Diagnoses amongst patients entering treatment for eating disorders in Sweden in 2012-2016. There were about 2600 patient each year and the proportions are averaged over these years. Children were <18 years old.

| Diagnosis                               | Proportion (%) |        |
|-----------------------------------------|----------------|--------|
|                                         | Children       | Adults |
| Anorexia Nervosa                        | 39             | 20     |
| Bulimia Nervosa                         | 8              | 32     |
| Eating Disorder Not Otherwise Specified | 45             | 37     |

|                       |   |   |
|-----------------------|---|---|
| Binge Eating Disorder | 1 | 6 |
| Other*                | 7 | 5 |

\*Not specified.

### Combined outcomes at all clinics

Figure 1 shows that the total number of patients treated at all clinics increased to about 2600 in 2013, and remained relatively stable over the following years. The figure also shows that fewer than half the patients were typically followed-up a year later and that the rate of remission was about 21% in 2012-2014, and decreased to 14% in 2016. The number of patients treated to remission increased from 477 in 2012 to 589 in 2014 and decreased to 358 in 2016. There is no information on possible differences in the number of patients in remission related to the diagnosis at the start of treatment.

--- Please insert Figure 1 about here ---

Figure 2 shows firstly, that the rate of remission at all clinics that followed-up their patients was less than 50% in 2012-2014, 29% in 2015, and 36% in 2016. Secondly, the figure shows that the rate of remission at clinics that had treated at least one patient to remission increased to 56% in 2015 and decreased to 54% in 2016. The second analysis thus excluded patients followed-up at clinics that did not treat a single patient to remission. The significance of these two calculations of remission rates is clarified in the Discussion.

--- Please insert Figure 2 about here ---

### Variability in outcomes

1  
2  
3 The probability of going into remission in 2012 was significantly different amongst the 17  
4 clinics that had treated patients in all recorded years ( $P < 0.001$ ;  $\text{Chi}^2 = 80.2$ ,  $\text{df} = 16$ ). The  
5 probability of going into remission was also significantly different amongst the five clinics  
6 that had treated at least 100 patients in 2012 ( $P < 0.001$ ;  $\text{Chi}^2 = 23.7$ ,  $\text{df} = 4$ ). Analysis of the other  
7 years gives similar results.  
8  
9  
10  
11  
12  
13  
14

15  
16 Analysis of the results at SCED showed that the probability of going into remission was  
17 significantly different over the years ( $P < 0.001$ ;  $\text{Chi}^2 = 46.3$ ,  $\text{df} = 4$ ). Analysis of the other  
18 clinics gives similar results.  
19  
20  
21  
22

### 23 24 **Combined outcomes at clinics that followed-up at least 20 patients**

25  
26  
27 Because Riksät reported on clinics that had followed-up at least 20 patients in 2012-2013 and  
28 for all clinics in 2014-2016, the number of clinics reporting their outcomes was lower in  
29 2012-2013 (21 and 23) than in 2014-2016 (70, 64, and 59). However, it is possible to compare  
30 how many clinics had treated, followed-up, and treated at least 20 patients to remission in  
31 2012-2016.  
32  
33  
34  
35  
36  
37  
38  
39

40 Figure 3 shows that more clinics had treated at least 20 patients in 2016 than in 2012.  
41 Whereas the clinics that had treated at least 20 patients in 2012 were selected for having  
42 followed them up, only 45% of these clinics followed-up at least 20 patients in 2016. About  
43 one in three of these clinics had treated at least 20 patients to remission in 2012 compared to  
44 about one in eight in 2016. The results in the other years fall in between the results in 2012  
45 and 2016.  
46  
47  
48  
49  
50  
51  
52  
53

54  
55 --- Please insert Figure 3 about here ---  
56  
57  
58  
59  
60

1  
2  
3 Out of the 33 clinics that had treated at least 20 patients in 2016 (Figure 3, green bar at  
4 the very left), three (9%) had not followed-up any patient, and 21 (64%) had not treated a  
5 single patient to remission. These 21 clinics had treated a total of 857 patients, with a median  
6 (range) of 32 (20-98) patients/clinic.  
7  
8  
9  
10  
11  
12

### 13 **Combined outcomes at clinics that followed-up fewer than 10 patients**

14  
15  
16  
17 Figure 4 shows that amongst the about 2600 patients who were treated annually in 2013-2016,  
18 the number of patients treated at clinics that followed-up fewer than 10 patients increased to  
19 more than 1000 in the last two years. In parallel, the proportion of patients who were  
20 followed-up and treated to remission at these clinics decreased. Fewer than one in ten of the  
21 patients were treated to remission in the final three years. Please note that the values for 2012  
22 include clinics that followed up fewer than 20 patients. Clinics following-up fewer than 10  
23 patients were not reported separately this year.  
24  
25  
26  
27  
28  
29  
30  
31  
32  
33

34 --- Please insert Figure 4 about here ---  
35  
36  
37

### 38 **Published outcomes at Mandometer clinics**

39  
40  
41 Table 2 shows that the proportion of patients in remission at 12 months assessments was at  
42 least 27% and significantly different at the three Mandometer clinics, whose outcomes are  
43 published. Treatment continues after the 12 months at these clinics and the proportion of  
44 patients in remission increases after various, prolonged periods of time. Please note that these  
45 clinics had been operating over various periods of time.  
46  
47  
48  
49  
50  
51  
52  
53  
54  
55  
56  
57  
58  
59  
60

**Table 2.** Proportion of patients in remission at Mandometer clinics.

| Outcome                             | Clinic   |          |       |
|-------------------------------------|----------|----------|-------|
|                                     | Alingsås | Danderyd | Mando |
| Operation (years)                   | 2        | 7        | 18    |
| <u>12 months assessment</u>         |          |          |       |
| Patients in remission               | 13       | 72       | 219   |
| Patients not in remission           | 36       | 107      | 552   |
| Proportion in remission             | 27       | 40*      | 28    |
| <u>Continued treatment (months)</u> |          |          |       |
| Patients in remission               | 19       | 141      | 490   |
| Patients not in remission           | 27       | 27       | 170   |
| Proportion in remission             | 39       | 82       | 68    |

\*P=0.0017 compared to Alingsås and Mando after P=0.0069 (overall difference).

It may be mentioned that the time to remission depends on the diagnosis at admission, with the longest time to remission for patients with anorexia nervosa (8).

### Outcomes at the three biggest clinics

SCED had treated about four times more patients annually (median: 715; range: 696-724) than Capio (175; 157-178) and Mando (123; 81-168), and followed-up about the same proportion of patients (43; 32-69%) as Capio (50; 48-65%) and Mando (43; 32-83%). These proportions are similar to the average proportions of follow-up at all clinics over these years (Figure 1).

Figure 5 shows that Mando had treated a bigger proportion of patients to remission than SCED and Capio in 2014-2016. Whilst the rate of remission was relatively stable at on average 36% at Mando over these three years, it decreased from 29% to 16% at SCED and from 30% to 14% at Capio. In 2016, the proportion of patients treated to remission at Mando (35%) was about twice as big as the corresponding proportion at SCED (16%) and Capio (14%).

--- Please insert Figure 5 about here ---

## DISCUSSION

### Patient characteristics, diagnostic procedures, and treatments

The characteristics of the patients, who have been treated for eating disorders in Sweden, including the proportion of males and children, age and diagnosis, have been relatively stable in recent years and are similar to the characteristics of eating disorders patients in other countries (19). It is worth noting that whilst a minority of the patients were diagnosed with Binge Eating Disorder, that disorder is now the most common eating disorder (20). Although the diagnostic procedures may differ amongst clinics (19), most of the procedures used in Sweden have been developed in other countries. In addition, the treatments used in Sweden,

1  
2  
3 including CBT, psychodynamic therapy, and family therapy, as well as medical and  
4  
5 psychopharmacological interventions aiming at restoring physical and mental health are the  
6  
7 same as those recommended in the guidelines and used in most countries (19,21–26). The  
8  
9 treatment at the Mandometer clinics differs in that an important intervention is the  
10  
11 normalization of eating behaviour using real time visual feedback on how to eat as described  
12  
13 many times and most recently by video (15). The differences and similarities amongst the  
14  
15 Mandometer treatment and CBT have been described in detail recently, including the  
16  
17 differences in outcomes (7).  
18  
19  
20  
21

### 22 **Outcomes in Sweden**

23  
24  
25  
26 About 2600 patients were treated annually at the eating disorders clinics in Sweden in 2012-  
27  
28 2016, fewer than half were followed-up, and the proportion of patients treated to remission  
29  
30 decreased from one in five in 2012 to less than one in seven in 2016. However, remission  
31  
32 rates which are more than three times higher have been publicized nationally. These estimates  
33  
34 were derived by excluding patients lost to follow-up and patients followed-up at clinics that  
35  
36 did not treat patients to remission. In 2016, only four clinics treated 20 patients to remission;  
37  
38 most clinics treated a small number of patients, followed-up a few, and treated only one  
39  
40 patient in ten to remission. Outcomes varied significantly between clinics each year and  
41  
42 within clinics over years. In addition, in 2016 more than half the 33 clinics that had treated on  
43  
44 average 32 patients had failed to treat a single patient to remission; one of these clinics had  
45  
46 treated 98 patients unsuccessfully.  
47  
48  
49  
50  
51

### 52 **Interpretation and comparison with published outcomes**

53  
54  
55  
56 Whilst these findings indicate that the procedures of treatment and follow-up differ amongst  
57  
58 clinics in Sweden, a word of caution seems appropriate. For example, although outcomes  
59  
60

1  
2  
3 were significantly different over years at the biggest clinic (SCED), patients were treated to  
4 remission all years, suggesting that a statistically significant within-clinic variation may be  
5 less significant clinically. However, it seems unlikely that the decrease from a rate of  
6 remission of about 30% in 2014 at this clinic to about half that rate two years later is a matter  
7 of random variation. And the similar decrease in the rate of remission at another clinic in  
8 these years (Capio) suggests that the procedures at these clinics had deteriorated, at least  
9 temporarily.

10  
11  
12  
13  
14  
15  
16  
17  
18  
19  
20  
21 Possible reasons for the variation in outcomes include changes in staffing, training of  
22 staff, patient compliance to treatment, and the physical conditions in the clinics, factors that  
23 affect outcomes in multicenter clinical trials (27). Whilst the “study protocol” of the  
24 multicenter trial aims at reducing the influence of these factors, there is no standard protocol  
25 for the treatment of eating disorders. And although there is agreement that the treatment  
26 guidelines for eating disorders should be followed, this consensus view has not yet improved  
27 outcomes (21–23,25,28–30). For example, an attempt at implementing CBT, which is  
28 recommended in all guidelines, in combination with antidepressant medication for the  
29 treatment of bulimia nervosa in primary care in the U.S. resulted in a 70% dropout rate (31).  
30 A similar effort in general practice in the U.K. found that out of 683 patients with a diagnosis  
31 of bulimia, about half of the 272 patients who entered CBT completed the treatment, and  
32 although those patients improved, they were not free of eating disorders symptoms after  
33 treatment (32). A recent study aiming to implement CBT for anorexia nervosa in general  
34 practice produced similar results. Thus, out of 257 patient referrals, 44 patients started in  
35 treatment and 22 completed the treatment (33), findings that were replicated in another recent  
36 study (34). Compliance is thus a general problem in the treatment of eating disorders, not a  
37 “Swedish” problem, but it can be improved as discussed below.



1  
2  
3 Whether these factors are causally related to the decrease in remission rates in 2015-  
4 2016 remains to be determined. But it may be of some significance that as the number of  
5 patients treated at clinics that treated fewer than ten patients to remission increased, the  
6 proportion of patients followed-up and treated to remission decreased (Figure 4). And when  
7 the number of patients followed-up at all clinics increased in 2015, there was a marked  
8 decrease in the proportion of patient treated to remission (Figures 1 and 2).  
9  
10  
11  
12  
13  
14  
15  
16  
17

18 The Mandometer treatment was developed starting in 1993, a theoretical framework and  
19 preliminary findings were reported in 1996 (14,35). A randomized controlled trial  
20 demonstrated its effectiveness and outcomes for 1428 patients treated at six clinics in four  
21 countries were subsequently reported (8,13). The combined rate of remission at these clinics  
22 was estimated to be about 75% in on average one year of treatment and the rate of relapse was  
23 estimated to be about 10% over five years of follow-up (8). Similar to Riksät, estimates were  
24 done amongst all patients entering treatment. However, far more patients were lost to follow-  
25 up at Riksät's one year time point of follow-up than to Mandometer's procedure of  
26 monitoring patients at three-month intervals throughout treatment and at 1, 2, 3, 6, 9, 12, 18,  
27 24, 36, 48, and 60 months of follow-up (8). Despite the difference, the rate of remission at the  
28 Mando clinic in the Stockholm County Council was on average 33% in 2012-2016 according  
29 to the Riksät calculation, which is about half the estimated published 75% rate of remission  
30 after on average one year of treatment (8). A comprehensive description of all patients,  
31 including those who take a long time to go into remission, is available in the supplementary  
32 files of (8), which report outcomes at three month intervals at all Mando clinics.  
33  
34  
35  
36  
37  
38  
39  
40  
41  
42  
43  
44  
45  
46  
47  
48  
49  
50  
51  
52  
53

54 Average remission rates should be viewed cautiously as outcomes varied between  
55 clinics. Thus, the published rate of remission at 12 months differed significantly at the three  
56 Mandometer clinics, yet it was higher than the average values reported for all clinics in each  
57  
58  
59  
60

1  
2  
3 of the five years in Riksät. Differences in treatment methods between the Mandometer clinics  
4 and the other clinics may explain the differences in outcomes (7) and it is possible that  
5  
6 outcomes will be more consistent at the Mandometer clinics once they have been operating  
7  
8 for a longer period of time. For example, the Alingsås clinic had been treating patients for  
9  
10 only two years and reached a rate of remission of only 39%. The variation in the rate of  
11  
12 remission at 12 months at the Mandometer clinics in Amsterdam (16%), San Diego (52%),  
13  
14 and Melbourne (25%) (8), support previous findings that international cultural and medical  
15  
16 system differences also affect treatment outcomes (36). Thus, patients treated in San Diego  
17  
18 improved rapidly, but they were often prevented from continuing in treatment because of the  
19  
20 financial constraints of their insurance policies (8), a problem that would not affect patients in  
21  
22 Sweden. It should be noted that relatively few patients had been treated at these clinics.  
23  
24  
25  
26  
27  
28  
29

30 Dropout and relapse are significant events in the treatment of eating disorders (7,37,38),  
31 and neither these events, nor remission, should be expected to occur after a predetermined  
32  
33 period of time such as at one year of follow-up as used in Riksät. Also, the precise time for  
34  
35 follow-up is not mentioned. It seems likely that this procedure explains why more than half  
36  
37 the patients were lost to follow-up in Riksät. Practical approaches to survival analysis,  
38  
39 including time-to-event analysis, are long available (18,39) and should be used in studies of  
40  
41 outcomes of eating disorders treatment. The higher level of compliance at the Mandometer  
42  
43 clinics (8) offers support for their value.  
44  
45  
46  
47  
48

49 Considering the difference between outcomes at Mando and the other Swedish clinics,  
50 including the fact that several hundred patients have been treated to remission, and that the  
51  
52 rate of relapse has been reduced to an estimated 10% at the Mando clinics, a randomized  
53  
54 controlled trial comparing outcomes at these clinics may be redundant; an attempt at a  
55  
56 comparison (40), was fraught with problems (8). The major treatment in Swedish clinics is  
57  
58  
59  
60

1  
2  
3 CBT and a detailed analysis showed that the remission rates after CBT are lower than those  
4  
5 after Mandometer treatment (7). Psychodynamic therapy is also used in Swedish clinics,  
6  
7 although outcomes of this therapy are inferior to those of CBT (41). Similarly, the use of  
8  
9 family-based therapies with children in Sweden as in other countries, probably does not  
10  
11 explain the differences in outcomes. Differences in patient characteristics at admission may  
12  
13 contribute to differences in treatment outcomes and the possibility that such differences exist  
14  
15 should be examined, although the published literature indicates that they do not (42). Also,  
16  
17 there are no differences in the Swedish referral system such that more severely ill patients at  
18  
19 one of the clinics might explain differences in outcomes.  
20  
21  
22  
23  
24

### 25 **Implications for policy makers**

26  
27  
28 Overestimations of the outcomes of the treatment for eating disorders in Sweden have been  
29  
30 publicized over several years (4), including the claim that “70% of the patients are ‘cured’  
31  
32 within one year”, which is maintained on Sweden’s National Educational Radio Channel (5).  
33  
34 This is similar to the international claim that CBT is “efficacious for a range of eating  
35  
36 disorder presentations in the short and long-term” (30), publicized as: “Based on a solid  
37  
38 empirical foundation, the transdiagnostic enhanced CBT approach will immediately become  
39  
40 the gold standard for the treatment of eating disorders” (43), and “[the effect of CBT] is the  
41  
42 most dramatic that we have seen in the literature ... [including] the potency ... and the  
43  
44 impressive maintenance of change over the 19-months follow-up” (44). The published  
45  
46 evidence does not support these claims (7,45–47) and evidence that the outcomes of CBT  
47  
48 have been overestimated for the treatment of other disorders is gradually emerging (48,49).  
49  
50 These overstatements have misinformed health policy makers and can now be corrected.  
51  
52  
53  
54  
55  
56

57 The importance of the National Quality Registries in guiding health care policies in  
58  
59 Sweden was recently re-emphasized (50). In order to guide decisions on matters of health  
60

1  
2  
3 care, national and international registries must offer reliable information. Widely publicized  
4  
5 “facts” need to be critically examined. Policy makers should be aware that once ill advised  
6  
7 policies have been established, retrospectively controlling their evidence basis can be  
8  
9 ineffective, and even strengthen the misguided policy (51,52).  
10  
11  
12

### 13 **Acknowledgements**

14  
15  
16  
17 We thank Sara Norring, Riksät, Anna Sandelin, the Centre of Registries Västra Götaland, and  
18  
19 Fredrik Westander and Lale Björne-Fergéus, SALAR, for information on Riksät.  
20  
21  
22

### 23 **Transparency declaration**

24  
25  
26 Södersten affirms that the manuscript is an honest, accurate, and transparent account of the  
27  
28 study being reported; that no important aspects of the study have been omitted; and that any  
29  
30 discrepancies from the study as planned (and, if relevant, registered) have been explained.  
31  
32  
33

### 34 **Ethics approval**

35  
36  
37  
38 The project was approved by the Regional Ethical Review Board of Stockholm (Dnr  
39  
40 2015/456-31).  
41  
42

### 43 **Contributorship**

44  
45  
46  
47 Södersten examined the registry data in detail over the last two years. He reviewed his  
48  
49 examinations for all authors at regular intervals during the examination period. He is  
50  
51 responsible for the overall content as guarantor and assumes responsibility for all aspects of  
52  
53 the work. All data used for the analysis are included as a supplementary table to this  
54  
55 submission, which all authors are happy to share with other researchers.  
56  
57  
58  
59  
60

1  
2  
3 Brodin is medical statistician and has performed all statistical analyses and reviewed these for  
4  
5 all authors at regular intervals during the examination period.  
6  
7

8  
9 Sjöberg is clinical director of the Mandometer Clinic in Alingsås and responsible for  
10  
11 treatment and data collection and reporting to the registry in 2012-2016.  
12  
13

14  
15 Zandian is clinical quality controller and has been responsible for data collection and  
16  
17 reporting to the registry in 2012-2016.  
18  
19

20  
21 Bergh is clinical director for the Mandometer Clinic in Huddinge and responsible for  
22  
23 treatment at all Mandometer clinics.  
24  
25

26  
27 All authors have seen and reviewed several versions of the manuscript and agreed to its final  
28  
29 version.  
30  
31

32  
33 Södersten is: “the corresponding author and attests that all listed authors meet authorship  
34  
35 criteria and that no others meeting the criteria have been omitted”.  
36  
37

### 38 **Acknowledgement**

39  
40  
41 Åsa Lundqvist BA of the Mandometer Clinic in Stockholm has been contact person with the  
42  
43 Rikät registry staff over the years 2012-2016. Ms Lundqvist supervised the reporting of data  
44  
45 to the registry and is in charge of the follow-up programme of the Mandometer Clinic.  
46  
47  
48

### 49 **Competing interests**

50  
51  
52 Complete openness concerning financial arrangements is intended here. Brodin, Sjöberg and  
53  
54 Zandian declare that they have no financial interests related to this study. Our research is  
55  
56 carried out at the Karolinska Institute, where Södersten is a professor em. The research is  
57  
58 translated clinically by Mando Group AB, a company started by Södersten and Bergh, who  
59  
60

1  
2  
3 have 47.5% of the stock each. Professor Michael Leon of the University of California at  
4  
5 Irvine has 5%. Mando Group AB contracts with the County Council of Stockholm every fifth  
6  
7 year to treat patients with eating disorders. Mando Groups AB signed its first contract in 1997  
8  
9 with the County Council of Stockholm and, since then, its treatment is one of the standards of  
10  
11 care offered to the citizens of Stockholm. This arrangement is the same as when the County  
12  
13 Council of Stockholm contracts with its own clinics to treat patients with all kinds of disease,  
14  
15 including eating disorders. That is to say, the County Council of Stockholm provides eating-  
16  
17 disorder services to the citizens of Stockholm both through a clinic of its own and through  
18  
19 Mando Group AB. There is a third provider of care for patients with eating disorders in  
20  
21 Stockholm, which is a private clinic. All health care in Sweden is funded through the tax  
22  
23 system; private pay is extremely uncommon. It should be added firstly, that Mando Group AB  
24  
25 is in compliance with the recommendation of the International Committee of Medical Journal  
26  
27 Editors on “Author Responsibilities-Conflicts of Interest”  
28  
29 [http://www.icmje.org/recommendations/browse/roles-and-responsibilities/author-](http://www.icmje.org/recommendations/browse/roles-and-responsibilities/author-responsibilities--conflicts-of-interest.html)  
30  
31 [responsibilities--conflicts-of-interest.html](http://www.icmje.org/recommendations/browse/roles-and-responsibilities/author-responsibilities--conflicts-of-interest.html). Secondly, it should also be added that all profit  
32  
33 that Mando Group AB has made has been re-invested in research and development and that  
34  
35 there have been no dividends to stock owners. All of the above is declared in all manuscript  
36  
37 submissions and thus far, journals have judged it necessary to publish only some of the  
38  
39 details. It seems, however, that the potential ethical problem when scientists translate their  
40  
41 research findings into the clinic in a company is not unlike that which arises when any  
42  
43 scientist, in an academic setting is developing a theory and needs further economic funding  
44  
45 for her/his work and may receive recognition and financial benefits for the work. The  
46  
47 incentive is, in part, economic in this case as well and the ethical “problem” is similar in both  
48  
49 cases. However, the more important incentive is the improvement of the treatment of patients  
50  
51 with eating disorders. We are researchers working in an academic setting and like many other  
52  
53  
54  
55  
56  
57  
58  
59  
60

1  
2  
3 medical research institutes today, the Karolinska Institute encourages scientists to translate  
4  
5 their research into the clinic in companies that aim to generate financial profits to be used for  
6  
7 research and development (see:

8  
9  
10 [http://ki.se.proxy.kib.ki.se/sites/default/files/summary\\_strategy2018.pdf](http://ki.se.proxy.kib.ki.se/sites/default/files/summary_strategy2018.pdf)).  
11  
12

### 13 **Funding**

14  
15  
16  
17 This work was supported by The County Council of Stockholm grant number HNSV 15896,  
18  
19 HSN 1502-0291, project 3252.  
20  
21

### 22 **Role of the sponsor**

23  
24  
25  
26 The sponsor had no influence on the work.  
27  
28

### 29 **Data sharing statement**

30  
31  
32  
33 The data used for this analysis are available in a supplementary table.  
34  
35  
36  
37  
38  
39  
40  
41  
42  
43  
44  
45  
46  
47  
48  
49  
50  
51  
52  
53  
54  
55  
56  
57  
58  
59  
60

## References

1. Swedish Association of Local Authorities and Regions. Swedish National Quality Registries [Internet]. [cited 2018 May 7]. Available from: <http://kvalitetsregister.se/englishpages.2040.html>
2. Government Offices of Sweden. Överenskommelse om stöd till nationella kvalitetsregister under 2018 [Internet]. [cited 2018 May 7]. Available from: <http://www.regeringen.se/overenskommelser-och-avtal/2017/12/nationella-kvalitetsregister/>
3. Swedish Association of Local Authorities and Regions. Vården i Siffror [Internet]. [cited 2018 May 7]. Available from: <https://vardenisiffror.se/>
4. Birgegård A, Norring C, Norring S. National Quality Register for Eating Disorders Treatment [Internet]. [cited 2018 May 7]. Available from: <https://riksat.registercentrum.se/>
5. von Hausswolff-Juhlin Y. Från evidens till praktiska råd [Internet]. [cited 2018 May 7]. Available from: <https://urplay.se/program/203090-ur-samtiden-ny-kunskap-om-atstorningar-fran-evidens-till-praktiska-rad>
6. Linardon J, Wade TD, de la Piedad Garcia X, Brennan L. The efficacy of cognitive-behavioral therapy for eating disorders: A systematic review and meta-analysis. *J Consult Clin Psychol*. 2017 Nov;85(11):1080–94.
7. Södersten P, Bergh C, Leon M, Brodin U, Zandian M. Cognitive behavior therapy for eating disorders versus normalization of eating behavior. *Physiol Behav*. 2017 Mar 16;174:178–90.
8. Bergh C, Callmar M, Danemar S, Hölcke M, Isberg S, Leon M, et al. Effective treatment of eating disorders: Results at multiple sites. *Behav Neurosci*. 2013 Dec;127(6):878–89.
9. Fairburn C, Cooper Z, O'Connor M. Eating disorders examination (16.0D). In C. Fairburn (Ed.), *Cognitive behavior therapy and eating disorders*. New York, N.Y.: Guilford Press; 2008.
10. Bohn K, Fairburn CG. Clinical impairment assessment questionnaire (CIA 3.0). In: *Cognitive behavior therapy for eating disorders*. New York, N.Y.: Guildford Press; p. 315–7.
11. Aas IHM. Global Assessment of Functioning (GAF): properties and frontier of current knowledge. *Ann Gen Psychiatry*. 2010 May 7;9:20.
12. American Psychiatric Association. *Diagnostic and Statistical Manual of Mental Disorders*. fourth ed. Washington, D.C.: American Psychiatric Association; 1994.
13. Bergh C, Brodin U, Lindberg G, Södersten P. Randomized controlled trial of a treatment for anorexia and bulimia nervosa. *Proc Natl Acad Sci*. 2002 Jul 9;99(14):9486–91.



14. Bergh C, Eklund S, Eriksson M, Lindberg G, Södersten P. A new treatment of anorexia nervosa. *The Lancet*. 1996 Aug 31;348(9027):611–2.
15. Esfandiari M, Papapanagiotou V, Diou C, Zandian M, Nolstam J, Södersten P, et al. Control of eating behavior using a novel feedback system. *J Vis Exp JoVE*. 2018 08;(135).
16. Zandian M, Holmstedt E, Larsson A, Bergh C, Brodin U, Södersten P. Anxiolytic effect of warmth in anorexia nervosa. *Acta Psychiatr Scand*. 2017;135(3):266–7.
17. Kirkwood BR, Sterne JAC. *Essential Medical Statistics*. Blackwell, Oxford; 2003.
18. Tableman M, Kim JS. *Survival Analysis Using S: Analysis of Time-to-Event Data*. Boca Raton, FL: Chapman & Hall/CRC; 2004.
19. Treasure J, Claudino AM, Zucker N. Eating disorders. *The Lancet*. 2010 Feb 19;375(9714):583–93.
20. Erskine HE, Whiteford HA. Epidemiology of binge eating disorder. *Curr Opin Psychiatry*. 2018 Aug 13;
21. af Sandeberg A-M, Birgegård A, Mohlin L, Nordlander Ström C, Norring C, Siverstrand M-L. Regionalt vårdprogram – ätstörningar. [Internet]. [cited 2018 May 7]. Available from: [http://www1.psykiatristod.se/Global/varprogram\\_fulltext/RV\\_Atstorningar\\_2009\\_updat2010.pdf](http://www1.psykiatristod.se/Global/varprogram_fulltext/RV_Atstorningar_2009_updat2010.pdf)
22. Hay P, Chinn D, Forbes D, Madden S, Newton R, Sugenor L, et al. Royal Australian and New Zealand College of Psychiatrists clinical practice guidelines for the treatment of eating disorders. *Aust N Z J Psychiatry*. 2014 Nov 1;48(11):977–1008.
23. Hay PP, Bacaltchuk J, Stefano S, Kashyap P. Psychological treatments for bulimia nervosa and bingeing. *Cochrane Database Syst Rev*. 2009 Oct 7;(4):CD000562.
24. Hay P. A systematic review of evidence for psychological treatments in eating disorders: 2005–2012. *Int J Eat Disord*. 2013 Jul 1;46(5):462–9.
25. Zipfel S, Giel KE, Bulik CM, Hay P, Schmidt U. Anorexia nervosa: aetiology, assessment, and treatment. *Lancet Psychiatry*. 2015 Dec;2(12):1099–111.
26. Treasure J, Zipfel S, Micali N, Wade T, Stice E, Claudino A, et al. Anorexia nervosa. *Nat Rev Dis Primer*. 2015 26;1:15074.
27. Guthrie LB, Oken E, Sterne JA, Gillman MW, Patel R, Vilchuck K, et al. Ongoing monitoring of data clustering in multicenter studies. *BMC Med Res Methodol*. 2012 Mar 13;12:29.
28. Allen S, Dalton WT. Treatment of eating disorders in primary care: a systematic review. *J Health Psychol*. 2011 Nov;16(8):1165–76.

- 1
  - 2
  - 3
  - 4
  - 5
  - 6
  - 7
  - 8
  - 9
  - 10
  - 11
  - 12
  - 13
  - 14
  - 15
  - 16
  - 17
  - 18
  - 19
  - 20
  - 21
  - 22
  - 23
  - 24
  - 25
  - 26
  - 27
  - 28
  - 29
  - 30
  - 31
  - 32
  - 33
  - 34
  - 35
  - 36
  - 37
  - 38
  - 39
  - 40
  - 41
  - 42
  - 43
  - 44
  - 45
  - 46
  - 47
  - 48
  - 49
  - 50
  - 51
  - 52
  - 53
  - 54
  - 55
  - 56
  - 57
  - 58
  - 59
  - 60
29. Le Grange D, Hughes EK, Court A, Yeo M, Crosby RD, Sawyer SM. Randomized clinical trial of parent-focused treatment and family-based treatment for adolescent anorexia nervosa. *J Am Acad Child Adolesc Psychiatry*. 2016 Aug;55(8):683–92.
30. Linardon J, Fairburn CG, Fitzsimmons-Craft EE, Wilfley DE, Brennan L. The empirical status of the third-wave behaviour therapies for the treatment of eating disorders: A systematic review. *Clin Psychol Rev*. 2017 Dec;58:125–40.
31. Walsh BT, Fairburn CG, Mickley D, Sysko R, Parides MK. Treatment of bulimia nervosa in a primary care setting. *Am J Psychiatry*. 2004 Mar;161(3):556–61.
32. Knott S, Woodward D, Hoefkens A, Limbert C. Cognitive behaviour therapy for bulimia nervosa and eating disorders not otherwise specified: Translation from randomized controlled trial to a clinical setting. *Behav Cogn Psychother*. 2015 Nov;43(6):641–54.
33. Frostad S, Danielsen YS, Rekkedal GÅ, Jevne C, Dalle Grave R, Rø Ø, et al. Implementation of enhanced cognitive behaviour therapy (CBT-E) for adults with anorexia nervosa in an outpatient eating-disorder unit at a public hospital. *J Eat Disord*. 2018;6:12.
34. Jenkins PE, Morgan C, Houlihan C. Outpatient CBT for underweight patients with eating disorders: Effectiveness within a National Health Service (NHS) Eating Disorders Service. *Behav Cogn Psychother*. 2018 Aug 2;1–13.
35. Bergh C, Södersten P. Anorexia nervosa, self-starvation and the reward of stress. *Nat Med*. 1996 Jan;2(1):21–2.
36. Wright JG, Katz JN, Losina E. Clinical trials in orthopaedics research. Part I. Cultural and practical barriers to randomized trials in orthopaedics. *J Bone Joint Surg Am* [Internet]. 2011 Mar 2 [cited 2018 May 7];93(5). Available from: <https://www.ncbi.nlm.nih.gov/pmc/articles/PMC3043780/>
37. Linardon J, Hindle A, Brennan L. Dropout from cognitive-behavioral therapy for eating disorders: A meta-analysis of randomized, controlled trials. *Int J Eat Disord*. 2018 Mar 1;
38. Berends T, Boonstra N, van Elburg A. Relapse in anorexia nervosa: a systematic review and meta-analysis. *Curr Opin Psychiatry*. 2018 Aug 13;
39. Pocock SJ. *Clinical Trials: A Practical Approach*. First. Chichester West Sussex ; New York: Wiley; 1984. 278 p.
40. van Elburg AA, Hillebrand JJG, Huyser C, Snoek M, Kas MJH, Hoek HW, et al. Mandometer treatment not superior to treatment as usual for anorexia nervosa. *Int J Eat Disord*. 2012 Mar 1;45(2):193–201.
41. Poulsen S, Lunn S, Daniel SIF, Folke S, Mathiesen BB, Katznelson H, et al. A randomized controlled trial of psychoanalytic psychotherapy or cognitive-behavioral therapy for bulimia nervosa. *Am J Psychiatry*. 2014 Jan;171(1):109–16.
42. Södersten P, Bergh C, Leon M, Zandian M. Dopamine and anorexia nervosa. *Neurosci Biobehav Rev*. 2016 Jan;60:26–30.

- 1
- 2
- 3 43. Fairburn CG. *Cognitive Behavior Therapy and Eating Disorders*. New York: The
- 4 Guilford Press; 2008.
- 5
- 6 44. Hollon SD, Wilson GT. Psychoanalysis or cognitive-behavioral therapy for bulimia
- 7 nervosa: the specificity of psychological treatments. *Am J Psychiatry*. 2014
- 8 Jan;171(1):13–6.
- 9
- 10 45. Lampard AM, Sharbanee JM. The cognitive-behavioural theory and treatment of bulimia
- 11 nervosa: An examination of treatment mechanisms and future directions. *Aust Psychol*.
- 12 2015 Feb 1;50(1):6–13.
- 13
- 14 46. Troscianko ET. CBT for eating disorders: A not-yet-success story [Internet]. [cited 2018
- 15 May 8]. Available from: <https://www.psychologytoday.com/us/experts/emily-troscianko>
- 16
- 17 47. Gutiérrez E, Carrera O. Anorexia nervosa treatments and Occam’s razor. *Psychol Med*.
- 18 2018 Jan 25;1–2.
- 19
- 20 48. Christensen H, Mackinnon AJ. Review: computerised CBT improves adult depression in
- 21 the short-term, but its effect may have been overestimated previously. *Evid Based Ment*
- 22 *Health*. 2013 Nov;16(4):119.
- 23
- 24 49. Steinert C, Munder T, Rabung S, Hoyer J, Leichsenring F. Psychodynamic therapy: As
- 25 efficacious as other empirically supported treatments? A meta-analysis testing
- 26 equivalence of outcomes. *Am J Psychiatry*. 2017 01;174(10):943–53.
- 27
- 28 50. Granström E, Hansson J, Sparring V, Brommels M, Nyström ME. Enhancing policy
- 29 implementation to improve healthcare practices: The role and strategies of hybrid
- 30 national-local support structures. *Int J Health Plann Manage*. 2018 Aug 9;
- 31
- 32 51. Lewandowsky S, Ecker UKH, Seifert CM, Schwarz N, Cook J. Misinformation and its
- 33 correction: Continued influence and successful debiasing. *Psychol Sci Public Interest J*
- 34 *Am Psychol Soc*. 2012 Dec;13(3):106–31.
- 35
- 36 52. Fazio LK, Brashier NM, Payne BK, Marsh EJ. Knowledge does not protect against
- 37 illusory truth. *J Exp Psychol Gen*. 2015 Oct;144(5):993–1002.
- 38
- 39
- 40
- 41
- 42
- 43
- 44
- 45
- 46
- 47
- 48
- 49
- 50
- 51
- 52
- 53
- 54
- 55
- 56
- 57
- 58
- 59
- 60

## Figure legends

**Figure 1.** Number of patients treated at all clinics in Sweden and proportion of patients followed-up and in remission one year later. The year on the x-axis indicates the year of follow-up, the corresponding number of patients starting their treatment the year before.

**Figure 2.** Proportion of patients in remission at all clinics that followed-up their patients and at clinics that treated at least one patient to remission.

**Figure 3.** Number of clinics that treated, followed-up, and treated at least 20 patients to remission and proportion of clinics that followed-up and treated at least 20 patients to remission in 2012 and 2016.

**Figure 4.** Number of patients treated at clinics that followed-up fewer than 10 patients (2013-2016) or 20 patients (2012) and proportion of patients followed-up and in remission one year later. The year on the x-axis indicates the year of follow-up, the corresponding number of patients starting their treatment the year before.

**Figure 5.** Proportion of patients treated to remission at the three clinics that treated more patients to remission than any other clinic, the Stockholm Centre for Eating Disorders (SCED), the Capio Centre for Eating Disorders (Capio), and the Mandometer Clinic in Stockholm (Mando).



Figure 1. Number of patients treated at all clinics in Sweden and proportion of patients followed-up and in remission one year later. The year on the x-axis indicates the year of follow-up, the corresponding number of patients starting their treatment the year before.

127x180mm (300 x 300 DPI)

1  
2  
3  
4  
5  
6  
7  
8  
9  
10  
11  
12  
13  
14  
15  
16  
17  
18  
19  
20  
21  
22  
23  
24  
25  
26  
27  
28  
29  
30  
31  
32  
33  
34  
35  
36  
37  
38  
39  
40  
41  
42  
43  
44  
45  
46  
47  
48  
49  
50  
51  
52  
53  
54  
55  
56  
57  
58  
59  
60



Figure 2. Proportion of patients in remission at all clinics that followed-up their patients and at clinics that treated at least one patient to remission.

127x180mm (300 x 300 DPI)



Figure 3. Number of clinics that treated, followed-up, and treated at least 20 patients to remission and proportion of clinics that followed-up and treated at least 20 patients to remission in 2012 and 2016.

127x180mm (300 x 300 DPI)



Figure 4. Number of patients treated at clinics that followed-up fewer than 10 patients (2013-2016) or 20 patients (2012) and proportion of patients followed-up and in remission one year later. The year on the x-axis indicates the year of follow-up, the corresponding number of patients starting their treatment the year before.

89x66mm (300 x 300 DPI)



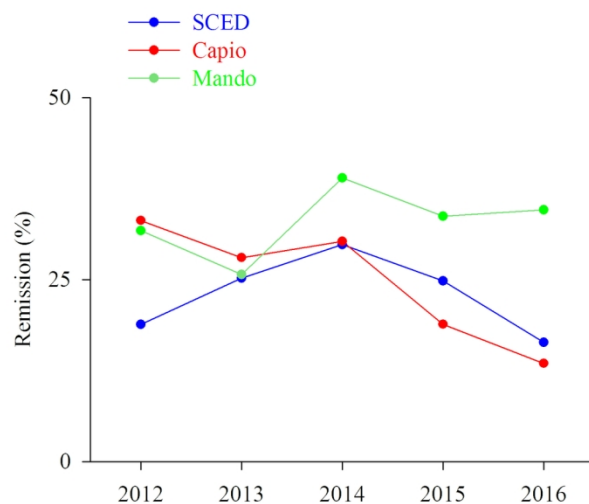

Figure 5. Proportion of patients treated to remission at the three clinics that treated more patients to remission than any other clinic, the Stockholm Centre for Eating Disorders (SCED), the Capiro Centre for Eating Disorders (Capiro), and the Mandometer Clinic in Stockholm (Mando).

127x180mm (300 x 300 DPI)

**Supplementary table.**

Number of patients treated (Treat), followed-up (F-up), and in remission at follow-up (Rem) at eating disorders clinics in Sweden in 2012-2016. The three clinics in the Stockholm County Council are the Stockholm Centre for Eating Disorders (SCED, A01), Caphio Centre for Eating Disorders (Caphio, A04), and the Mandometer Clinic (Mando (B01). Other is the combination of all clinics that followed-up fewer than 20 patients in 2012-2013 and fewer than 10 patients in 2014-2016.

Whilst most of the cells can filled in, it is not possible to fill in all cells, because of the procedures of follow-up. The clinics are arranged from the maximal-minimal number of patients treated.

| <b>2012</b>   |              |             |            | <b>2013</b>   |              |             |            | <b>2014</b>   |              |             |            |
|---------------|--------------|-------------|------------|---------------|--------------|-------------|------------|---------------|--------------|-------------|------------|
| <b>Clinic</b> | <b>Treat</b> | <b>F-up</b> | <b>Rem</b> | <b>Clinic</b> | <b>Treat</b> | <b>F-up</b> | <b>Rem</b> | <b>Clinic</b> | <b>Treat</b> | <b>F-up</b> | <b>Rem</b> |
| <b>A01</b>    | 696          | 224         | 131        | <b>A01</b>    | 710          | 305         | 179        | <b>A01</b>    | 705          | 339         | 210        |
| <b>A04</b>    | 157          | 93          | 52         | <b>A04</b>    | 176          | 88          | 49         | <b>A04</b>    | 162          | 77          | 49         |
| <b>B01</b>    | 123          | 53          | 39         | <b>B01</b>    | 168          | 54          | 43         | <b>B01</b>    | 136          | 59          | 53         |
| <b>T01</b>    | 120          | 50          | 21         | <b>T01</b>    | 116          | 39          | 20         | <b>M10</b>    | 105          | 36          | 20         |
| <b>M10</b>    | 107          | 38          | 22         | <b>M10</b>    | 111          | 36          | 22         | <b>T01</b>    | 99           | 46          | 21         |
| <b>U02</b>    | 90           | 23          | 9          | <b>O09</b>    | 89           | 36          | 19         | <b>X02</b>    | 85           | 40          | 22         |
| <b>O09</b>    | 78           | 38          | 16         | <b>E12</b>    | 83           | 41          | 28         | <b>H01</b>    | 82           | 36          | 15         |
| <b>E12</b>    | 66           | 25          | 14         | <b>Å04</b>    | 63           | 35          | 21         | <b>U02</b>    | 78           | 16          | 6          |
| <b>N05</b>    | 49           | 26          | 11         | <b>H01</b>    | 59           | 43          | 18         | <b>E12</b>    | 72           | 38          | 23         |
| <b>R01</b>    | 48           | 33          | 13         | <b>N02</b>    | 58           | 30          | 7          | <b>N07</b>    | 66           | 16          | 3          |
| <b>H01</b>    | 44           | 44          | 12         | <b>O07</b>    | 56           | 35          | 4          | <b>S02</b>    | 63           | 1           | 0          |
| <b>D03</b>    | 40           | 38          | 7          | <b>O03</b>    | 44           | 44          | 6          | <b>O09</b>    | 57           | 27          | 15         |
| <b>K08</b>    | 36           | 24          | 12         | <b>M12</b>    | 42           | 41          | 10         | <b>N02</b>    | 55           | 32          | 15         |
| <b>O03</b>    | 36           | 33          | 8          | <b>N05</b>    | 39           | 26          | 3          | <b>C04</b>    | 52           | 0           | 0          |
| <b>Å04</b>    | 33           | 21          | 7          | <b>N07</b>    | 39           | 21          | 1          | <b>O03</b>    | 52           | 30          | 5          |
| <b>O07</b>    | 31           | 31          | 5          | <b>C03</b>    | 38           | 30          | 13         | <b>W11</b>    | 49           | 11          | 0          |
| <b>W01</b>    | 30           | 28          | 20         | <b>P04</b>    | 33           | 32          | 9          | <b>O07</b>    | 43           | 16          | 2          |
| <b>N02</b>    | 29           | 28          | 1          | <b>W01</b>    | 28           | 28          | 9          | <b>N05</b>    | 40           | 16          | 8          |
| <b>N07</b>    | 29           | 22          | 2          | <b>D03</b>    |              | 12          | 3          | <b>C03</b>    | 39           | 17          | 5          |
| <b>P04</b>    | 26           | 26          | 0          | <b>K08</b>    |              | 13          | 9          | <b>M52</b>    | 39           | 20          | 11         |
| <b>C03</b>    | 21           | 21          | 8          | <b>U02</b>    |              | 12          | 5          | <b>P04</b>    | 37           | 15          | 0          |
| <b>Other</b>  | 378          | 165         | 67         | <b>Z02</b>    |              | 13          | 8          | <b>Å02</b>    | 33           | 27          | 14         |
|               |              |             |            | <b>Å02</b>    |              | 11          | 10         | <b>D03</b>    | 31           | 11          | 0          |
| <b>Sum</b>    | <b>2267</b>  | <b>1084</b> | <b>477</b> | <b>Other</b>  | 806          | 218         | 69         | <b>M03</b>    | 30           | 7           | 0          |
|               |              |             |            |               |              |             |            | <b>Å04</b>    | 30           | 19          | 14         |
|               |              |             |            | <b>Sum</b>    | <b>2758</b>  | <b>1243</b> | <b>566</b> | <b>R01</b>    | 29           | 4           | 0          |
|               |              |             |            |               |              |             |            | <b>Y06</b>    | 29           | 0           | 0          |
|               |              |             |            |               |              |             |            | <b>M12</b>    | 26           | 15          | 7          |
|               |              |             |            |               |              |             |            | <b>W04</b>    | 26           | 8           | 0          |
|               |              |             |            |               |              |             |            | <b>K08</b>    | 25           | 13          | 9          |
|               |              |             |            |               |              |             |            | <b>W01</b>    | 24           | 9           | 0          |
|               |              |             |            |               |              |             |            | <b>B03</b>    | 20           | 4           | 0          |
|               |              |             |            |               |              |             |            | <b>B05</b>    | 19           | 1           | 0          |
|               |              |             |            |               |              |             |            | <b>Z02</b>    | 19           | 10          | 10         |
|               |              |             |            |               |              |             |            | <b>Å12</b>    | 19           | 4           | 0          |
|               |              |             |            |               |              |             |            | <b>D08</b>    | 18           | 10          | 8          |
|               |              |             |            |               |              |             |            | <b>F01</b>    | 17           | 10          | 0          |
|               |              |             |            |               |              |             |            | <b>Y05</b>    | 16           | 3           | 0          |
|               |              |             |            |               |              |             |            | <b>O66</b>    | 15           | 6           | 0          |

|              |             |             |            |
|--------------|-------------|-------------|------------|
| <b>E08</b>   | 13          | 6           | 0          |
| <b>F02</b>   | 13          | 12          | 3          |
| <b>M28</b>   | 13          | 7           | 0          |
| <b>Å06</b>   | 11          | 2           | 0          |
| <b>E09</b>   | 9           | 2           | 0          |
| <b>I05</b>   | 9           | 0           | 0          |
| <b>Y08</b>   | 9           | 1           | 0          |
| <b>D14</b>   | 8           | 0           | 0          |
| <b>Z05</b>   | 8           | 0           | 0          |
| <b>G03</b>   | 7           | 5           | 0          |
| <b>E06</b>   | 6           | 0           | 0          |
| <b>E17</b>   | 6           | 4           | 0          |
| <b>D06</b>   | 5           | 0           | 0          |
| <b>I01</b>   | 5           | 0           | 0          |
| <b>Å11</b>   | 5           | 3           | 0          |
| <b>F04</b>   | 4           | 2           | 0          |
| <b>F10</b>   | 4           | 0           | 0          |
| <b>E11</b>   | 3           | 0           | 0          |
| <b>E25</b>   | 3           | 2           | 0          |
| <b>O46</b>   | 3           | 3           | 0          |
| <b>E22</b>   | 2           | 1           | 0          |
| <b>O01</b>   | 2           | 0           | 0          |
| <b>B10</b>   | 1           | 0           | 0          |
| <b>F07</b>   | 1           | 0           | 0          |
| <b>F08</b>   | 1           | 0           | 0          |
| <b>K09</b>   | 1           | 0           | 0          |
| <b>O67</b>   | 1           | 0           | 0          |
| <b>W13</b>   | 1           | 0           | 0          |
| <b>Y07</b>   | 1           | 0           | 0          |
| <b>Y10</b>   | 1           | 0           | 0          |
| <b>Y11</b>   | 1           | 0           | 0          |
| <b>I01</b>   | 0           | 0           | 0          |
| <b>M37</b>   | 0           | 0           | 0          |
| <b>M57</b>   | 0           | 0           | 0          |
| <b>O27</b>   | 0           | 0           | 0          |
| <b>O31</b>   | 0           | 0           | 0          |
| <b>O35</b>   | 0           | 0           | 0          |
| <b>O36</b>   | 0           | 0           | 0          |
| <b>O37</b>   | 0           | 0           | 0          |
| <b>O50</b>   | 0           | 0           | 0          |
| <b>O72</b>   | 0           | 0           | 0          |
| <b>Other</b> |             | 128         | 41         |
| <b>Sum</b>   | <b>2699</b> | <b>1098</b> | <b>548</b> |

## 2015

| Clinic | Treat | F-up | Rem |
|--------|-------|------|-----|
| A01    | 734   | 505  | 182 |
| A04    | 175   | 113  | 33  |
| O09    | 109   | 13   | 0   |
| T01    | 106   | 36   | 0   |
| B01    | 95    | 79   | 32  |
| M10    | 95    | 42   | 15  |
| H01    | 93    | 51   | 4   |
| X02    | 83    | 7    | 0   |
| S02    | 73    | 37   | 0   |
| U02    | 73    | 14   | 0   |
| N07    | 71    | 20   | 0   |
| E12    | 59    | 49   | 20  |
| N02    | 47    | 41   | 6   |
| N05    | 45    | 5    | 0   |
| M52    | 40    | 7    | 3   |
| C04    | 36    | 0    | 0   |
| O07    | 35    | 31   | 3   |
| M03    | 34    | 5    | 0   |
| Å04    | 34    | 14   | 7   |
| D03    | 31    | 18   | 0   |
| M12    | 31    | 9    | 0   |
| O03    | 29    | 21   | 10  |
| C03    | 26    | 13   | 11  |
| Z02    | 26    | 13   | 9   |
| M57    | 25    | 0    | 0   |
| K08    | 23    | 16   | 0   |
| B03    | 22    | 14   | 0   |
| Å02    | 22    | 11   | 0   |
| E08    | 18    | 10   | 0   |
| O27    | 17    | 17   | 7   |
| P04    | 17    | 0    | 0   |
| W01    | 17    | 17   | 5   |
| Y06    | 15    | 7    | 0   |
| D08    | 14    | 2    | 0   |
| G03    | 14    | 6    | 0   |
| I05    | 13    | 0    | 0   |
| O66    | 13    | 13   | 0   |
| R01    | 13    | 6    | 0   |
| Y05    | 13    | 2    | 0   |

## 2016

| Clinic | Treat | F-up | Rem |
|--------|-------|------|-----|
| A01    | 715   | 298  | 117 |
| A04    | 178   | 95   | 24  |
| T01    | 98    | 20   | 0   |
| O09    | 85    | 40   | 0   |
| X02    | 82    | 49   | 0   |
| B01    | 81    | 43   | 28  |
| O27    | 80    | 52   | 7   |
| H01    | 77    | 23   | 6   |
| M10    | 75    | 17   | 6   |
| E12    | 67    | 35   | 7   |
| C03    | 64    | 30   | 20  |
| N07    | 64    | 1    | 0   |
| U02    | 63    | 0    | 0   |
| C04    | 49    | 0    | 0   |
| O07    | 49    | 28   | 5   |
| W11    | 44    | 2    | 0   |
| N02    | 40    | 13   | 0   |
| M52    | 36    | 34   | 0   |
| N05    | 35    | 26   | 0   |
| O03    | 35    | 24   | 8   |
| S02    | 32    | 7    | 0   |
| W01    | 31    | 29   | 11  |
| Y06    | 31    | 5    | 0   |
| Å04    | 30    | 12   | 10  |
| M03    | 26    | 1    | 0   |
| B03    | 23    | 1    | 0   |
| D03    | 23    | 15   | 0   |
| K08    | 23    | 13   | 0   |
| L01    | 21    | 0    | 0   |
| M37    | 21    | 1    | 0   |
| Z02    | 21    | 6    | 0   |
| E17    | 20    | 12   | 0   |
| Å12    | 20    | 1    | 0   |
| M28    | 19    | 7    | 0   |
| R01    | 19    | 5    | 0   |
| Å02    | 19    | 5    | 0   |
| W04    | 17    | 6    | 0   |
| O66    | 15    | 15   | 5   |
| Y05    | 15    | 2    | 0   |

|    |              |             |             |            |              |             |            |            |
|----|--------------|-------------|-------------|------------|--------------|-------------|------------|------------|
| 1  |              |             |             |            |              |             |            |            |
| 2  | <b>D14</b>   | 12          | 0           | 0          | <b>F01</b>   | 13          | 0          | 0          |
| 3  | <b>W11</b>   | 12          | 0           | 0          | <b>E09</b>   | 11          | 0          | 0          |
| 4  | <b>E17</b>   | 10          | 6           | 0          | <b>M12</b>   | 10          | 3          | 0          |
| 5  | <b>W04</b>   | 10          | 4           | 0          | <b>O72</b>   | 9           | 1          | 0          |
| 6  | <b>Å06</b>   | 10          | 8           | 0          | <b>B05</b>   | 7           | 3          | 0          |
| 7  | <b>Å12</b>   | 10          | 2           | 0          | <b>E08</b>   | 7           | 3          | 0          |
| 8  | <b>E09</b>   | 9           | 1           | 0          | <b>I05</b>   | 7           | 0          | 0          |
| 9  | <b>B05</b>   | 7           | 2           | 0          | <b>G03</b>   | 6           | 2          | 0          |
| 10 | <b>L01</b>   | 7           | 0           | 0          | <b>Z05</b>   | 6           | 0          | 0          |
| 11 | <b>M28</b>   | 7           | 1           | 0          | <b>Å06</b>   | 6           | 4          | 0          |
| 12 | <b>Y08</b>   | 6           | 1           | 0          | <b>D08</b>   | 5           | 4          | 0          |
| 13 | <b>E06</b>   | 5           | 0           | 0          | <b>E06</b>   | 5           | 0          | 0          |
| 14 | <b>F02</b>   | 5           | 0           | 0          | <b>I02</b>   | 5           | 2          | 0          |
| 15 | <b>Å11</b>   | 5           | 0           | 0          | <b>M57</b>   | 5           | 0          | 0          |
| 16 | <b>I02</b>   | 4           | 1           | 0          | <b>Y08</b>   | 3           | 1          | 0          |
| 17 | <b>M37</b>   | 4           | 4           | 0          | <b>F04</b>   | 2           | 2          | 0          |
| 18 | <b>O72</b>   | 4           | 1           | 0          | <b>O71</b>   | 2           | 0          | 0          |
| 19 | <b>D06</b>   | 2           | 0           | 0          | <b>E22</b>   | 1           | 0          | 0          |
| 20 | <b>F01</b>   | 2           | 2           | 0          | <b>Y11</b>   | 1           | 0          | 0          |
| 21 | <b>F10</b>   | 2           | 0           | 0          | <b>Å11</b>   | 1           | 0          | 0          |
| 22 | <b>Y11</b>   | 2           | 0           | 0          | <b>B10</b>   | 0           | 0          | 0          |
| 23 | <b>B10</b>   | 1           | 0           | 0          | <b>D06</b>   | 0           | 0          | 0          |
| 24 | <b>E25</b>   | 1           | 0           | 0          | <b>D14</b>   | 0           | 0          | 0          |
| 25 | <b>F04</b>   | 1           | 0           | 0          | <b>E25</b>   | 0           | 0          | 0          |
| 26 | <b>Z05</b>   | 1           | 0           | 0          | <b>F02</b>   | 0           | 0          | 0          |
| 27 | <b>E11</b>   | 0           | 0           | 0          | <b>F10</b>   | 0           | 0          | 0          |
| 28 | <b>E22</b>   | 0           | 0           | 0          | <b>P04</b>   | 0           | 0          | 0          |
| 29 | <b>F07</b>   | 0           | 0           | 0          | <b>E11</b>   | 0           | 0          | 0          |
| 30 | <b>F08</b>   | 0           | 0           | 0          | <b>F07</b>   | 0           | 0          | 0          |
| 31 | <b>K09</b>   | 0           | 0           | 0          | <b>F08</b>   | 0           | 0          | 0          |
| 32 | <b>O01</b>   | 0           | 0           | 0          | <b>K09</b>   | 0           | 0          | 0          |
| 33 | <b>O46</b>   | 0           | 0           | 0          | <b>O01</b>   | 0           | 0          | 0          |
| 34 | <b>O67</b>   | 0           | 0           | 0          | <b>O46</b>   | 0           | 0          | 0          |
| 35 | <b>O71</b>   | 0           | 0           | 0          | <b>O67</b>   | 0           | 0          | 0          |
| 36 | <b>W13</b>   | 0           | 0           | 0          | <b>W13</b>   | 0           | 0          | 0          |
| 37 | <b>Y07</b>   | 0           | 0           | 0          | <b>Y07</b>   | 0           | 0          | 0          |
| 38 | <b>Y10</b>   | 0           | 0           | 0          | <b>Y10</b>   | 0           | 0          | 0          |
| 39 | <b>Other</b> |             | 147         | 76         | <b>Other</b> |             |            | 104        |
| 40 |              |             |             |            |              |             |            |            |
| 41 | <b>Sum</b>   | <b>2575</b> | <b>1444</b> | <b>423</b> | <b>Sum</b>   | <b>2555</b> | <b>998</b> | <b>358</b> |
| 42 |              |             |             |            |              |             |            |            |
| 43 |              |             |             |            |              |             |            |            |
| 44 |              |             |             |            |              |             |            |            |
| 45 |              |             |             |            |              |             |            |            |
| 46 |              |             |             |            |              |             |            |            |
| 47 |              |             |             |            |              |             |            |            |
| 48 |              |             |             |            |              |             |            |            |
| 49 |              |             |             |            |              |             |            |            |
| 50 |              |             |             |            |              |             |            |            |
| 51 |              |             |             |            |              |             |            |            |
| 52 |              |             |             |            |              |             |            |            |
| 53 |              |             |             |            |              |             |            |            |
| 54 |              |             |             |            |              |             |            |            |
| 55 |              |             |             |            |              |             |            |            |
| 56 |              |             |             |            |              |             |            |            |
| 57 |              |             |             |            |              |             |            |            |
| 58 |              |             |             |            |              |             |            |            |
| 59 |              |             |             |            |              |             |            |            |
| 60 |              |             |             |            |              |             |            |            |

**STROBE 2007 (v4) Statement—Checklist of items that should be included in reports of cohort studies**

| Section/Topic             | Item # | Recommendation                                                                                                                                                                       | Reported on page # |
|---------------------------|--------|--------------------------------------------------------------------------------------------------------------------------------------------------------------------------------------|--------------------|
| Title and abstract        | 1      | (a) Indicate the study’s design with a commonly used term in the title or the abstract                                                                                               | 1                  |
|                           |        | (b) Provide in the abstract an informative and balanced summary of what was done and what was found                                                                                  | 2-3                |
| <b>Introduction</b>       |        |                                                                                                                                                                                      |                    |
| Background/rationale      | 2      | Explain the scientific background and rationale for the investigation being reported                                                                                                 | 5                  |
| Objectives                | 3      | State specific objectives, including any prespecified hypotheses                                                                                                                     | 5-6                |
| <b>Methods</b>            |        |                                                                                                                                                                                      |                    |
| Study design              | 4      | Present key elements of study design early in the paper                                                                                                                              | 8-10               |
| Setting                   | 5      | Describe the setting, locations, and relevant dates, including periods of recruitment, exposure, follow-up, and data collection                                                      | 5, 6, 8, 9         |
| Participants              | 6      | (a) Give the eligibility criteria, and the sources and methods of selection of participants. Describe methods of follow-up                                                           | 6, 7, 8            |
|                           |        | (b) For matched studies, give matching criteria and number of exposed and unexposed                                                                                                  |                    |
| Variables                 | 7      | Clearly define all outcomes, exposures, predictors, potential confounders, and effect modifiers. Give diagnostic criteria, if applicable                                             | 7                  |
| Data sources/ measurement | 8*     | For each variable of interest, give sources of data and details of methods of assessment (measurement). Describe comparability of assessment methods if there is more than one group | 5, 6,7             |
| Bias                      | 9      | Describe any efforts to address potential sources of bias                                                                                                                            |                    |
| Study size                | 10     | Explain how the study size was arrived at                                                                                                                                            | 6                  |
| Quantitative variables    | 11     | Explain how quantitative variables were handled in the analyses. If applicable, describe which groupings were chosen and why                                                         | 8, 9               |
| Statistical methods       | 12     | (a) Describe all statistical methods, including those used to control for confounding                                                                                                | 8, 9               |
|                           |        | (b) Describe any methods used to examine subgroups and interactions                                                                                                                  |                    |
|                           |        | (c) Explain how missing data were addressed                                                                                                                                          | 8, 9               |
|                           |        | (d) If applicable, explain how loss to follow-up was addressed                                                                                                                       |                    |
|                           |        | (e) Describe any sensitivity analyses                                                                                                                                                |                    |
| <b>Results</b>            |        |                                                                                                                                                                                      |                    |

|                          |     |                                                                                                                                                                                                                                                                                                                                                                                                               |                          |
|--------------------------|-----|---------------------------------------------------------------------------------------------------------------------------------------------------------------------------------------------------------------------------------------------------------------------------------------------------------------------------------------------------------------------------------------------------------------|--------------------------|
| Participants             | 13* | (a) Report numbers of individuals at each stage of study—eg numbers potentially eligible, examined for eligibility, confirmed eligible, included in the study, completing follow-up, and analysed<br>(b) Give reasons for non-participation at each stage<br>(c) Consider use of a flow diagram                                                                                                               | 10                       |
| Descriptive data         | 14* | (a) Give characteristics of study participants (eg demographic, clinical, social) and information on exposures and potential confounders<br>(b) Indicate number of participants with missing data for each variable of interest<br>(c) Summarise follow-up time (eg, average and total amount)                                                                                                                | 10, 11<br><br>11, 13, 14 |
| Outcome data             | 15* | Report numbers of outcome events or summary measures over time                                                                                                                                                                                                                                                                                                                                                | 11-14                    |
| Main results             | 16  | (a) Give unadjusted estimates and, if applicable, confounder-adjusted estimates and their precision (eg, 95% confidence interval). Make clear which confounders were adjusted for and why they were included<br>(b) Report category boundaries when continuous variables were categorized<br>(c) If relevant, consider translating estimates of relative risk into absolute risk for a meaningful time period |                          |
| Other analyses           | 17  | Report other analyses done—eg analyses of subgroups and interactions, and sensitivity analyses                                                                                                                                                                                                                                                                                                                |                          |
| <b>Discussion</b>        |     |                                                                                                                                                                                                                                                                                                                                                                                                               |                          |
| Key results              | 18  | Summarise key results with reference to study objectives                                                                                                                                                                                                                                                                                                                                                      | 16                       |
| <b>Limitations</b>       |     |                                                                                                                                                                                                                                                                                                                                                                                                               |                          |
| Interpretation           | 20  | Give a cautious overall interpretation of results considering objectives, limitations, multiplicity of analyses, results from similar studies, and other relevant evidence                                                                                                                                                                                                                                    | 16, 18                   |
| Generalisability         | 21  | Discuss the generalisability (external validity) of the study results                                                                                                                                                                                                                                                                                                                                         | 19, 20                   |
| <b>Other information</b> |     |                                                                                                                                                                                                                                                                                                                                                                                                               |                          |
| Funding                  | 22  | Give the source of funding and the role of the funders for the present study and, if applicable, for the original study on which the present article is based                                                                                                                                                                                                                                                 | 23, 24                   |

\*Give information separately for cases and controls in case-control studies and, if applicable, for exposed and unexposed groups in cohort and cross-sectional studies.

**Note:** An Explanation and Elaboration article discusses each checklist item and gives methodological background and published examples of transparent reporting. The STROBE checklist is best used in conjunction with this article (freely available on the Web sites of PLoS Medicine at <http://www.plosmedicine.org/>, Annals of Internal Medicine at <http://www.annals.org/>, and Epidemiology at <http://www.epidem.com/>). Information on the STROBE Initiative is available at [www.strobe-statement.org](http://www.strobe-statement.org).
