# Supplementary material for: Treatment outcomes for eating disorders in Sweden: data from the national quality registry
Source: PubMed Central journal article supplement — BMJ Open. 2019 Jan 15;9(1):e024179. doi: 10.1136/bmjopen-2018-024179 (PMC6340438; doi:10.1136/bmjopen-2018-024179), 2019-01-15
Supplement: bmjopen-2018-024179supp001.pdf [file bmjopen-2018-024179supp001.pdf]

**Supplementary table.**

Number of patients treated (Treat), followed-up (F-up), and in remission at follow-up (Rem) at eating disorders clinics in Sweden in 2012-2016. The three clinics in the Stockholm County Council are the Stockholm Centre for Eating Disorders (SCED, A01), Capio Centre for Eating Disorders (Capio, A04), and the Mandometer Clinic (Mando B01). Other is the combination of all clinics that followed-up fewer than 20 patients in 2012-2013 and fewer than 10 patients in 2014-2016. Whilst most of the cells can be filled in, it is not possible to fill in all cells, because of the procedures of follow-up. The clinics are arranged from the maximal-minimal number of patients treated.

| <b>2012</b>   |              |             |            | <b>2013</b>   |              |             |            | <b>2014</b>   |              |             |            |
|---------------|--------------|-------------|------------|---------------|--------------|-------------|------------|---------------|--------------|-------------|------------|
| <b>Clinic</b> | <b>Treat</b> | <b>F-up</b> | <b>Rem</b> | <b>Clinic</b> | <b>Treat</b> | <b>F-up</b> | <b>Rem</b> | <b>Clinic</b> | <b>Treat</b> | <b>F-up</b> | <b>Rem</b> |
| <b>A01</b>    | 696          | 224         | 131        | <b>A01</b>    | 710          | 305         | 179        | <b>A01</b>    | 705          | 339         | 210        |
| <b>A04</b>    | 157          | 93          | 52         | <b>A04</b>    | 176          | 88          | 49         | <b>A04</b>    | 162          | 77          | 49         |
| <b>B01</b>    | 123          | 53          | 39         | <b>B01</b>    | 168          | 54          | 43         | <b>B01</b>    | 136          | 59          | 53         |
| <b>T01</b>    | 120          | 50          | 21         | <b>T01</b>    | 116          | 39          | 20         | <b>M10</b>    | 105          | 36          | 20         |
| <b>M10</b>    | 107          | 38          | 22         | <b>M10</b>    | 111          | 36          | 22         | <b>T01</b>    | 99           | 46          | 21         |
| <b>U02</b>    | 90           | 23          | 9          | <b>O09</b>    | 89           | 36          | 19         | <b>X02</b>    | 85           | 40          | 22         |
| <b>O09</b>    | 78           | 38          | 16         | <b>E12</b>    | 83           | 41          | 28         | <b>H01</b>    | 82           | 36          | 15         |
| <b>E12</b>    | 66           | 25          | 14         | <b>Å04</b>    | 63           | 35          | 21         | <b>U02</b>    | 78           | 16          | 6          |
| <b>N05</b>    | 49           | 26          | 11         | <b>H01</b>    | 59           | 43          | 18         | <b>E12</b>    | 72           | 38          | 23         |
| <b>R01</b>    | 48           | 33          | 13         | <b>N02</b>    | 58           | 30          | 7          | <b>N07</b>    | 66           | 16          | 3          |
| <b>H01</b>    | 44           | 44          | 12         | <b>O07</b>    | 56           | 35          | 4          | <b>S02</b>    | 63           | 1           | 0          |
| <b>D03</b>    | 40           | 38          | 7          | <b>O03</b>    | 44           | 44          | 6          | <b>O09</b>    | 57           | 27          | 15         |
| <b>K08</b>    | 36           | 24          | 12         | <b>M12</b>    | 42           | 41          | 10         | <b>N02</b>    | 55           | 32          | 15         |
| <b>O03</b>    | 36           | 33          | 8          | <b>N05</b>    | 39           | 26          | 3          | <b>C04</b>    | 52           | 0           | 0          |
| <b>Å04</b>    | 33           | 21          | 7          | <b>N07</b>    | 39           | 21          | 1          | <b>O03</b>    | 52           | 30          | 5          |
| <b>O07</b>    | 31           | 31          | 5          | <b>C03</b>    | 38           | 30          | 13         | <b>W11</b>    | 49           | 11          | 0          |
| <b>W01</b>    | 30           | 28          | 20         | <b>P04</b>    | 33           | 32          | 9          | <b>O07</b>    | 43           | 16          | 2          |
| <b>N02</b>    | 29           | 28          | 1          | <b>W01</b>    | 28           | 28          | 9          | <b>N05</b>    | 40           | 16          | 8          |
| <b>N07</b>    | 29           | 22          | 2          | <b>D03</b>    |              | 12          | 3          | <b>C03</b>    | 39           | 17          | 5          |
| <b>P04</b>    | 26           | 26          | 0          | <b>K08</b>    |              | 13          | 9          | <b>M52</b>    | 39           | 20          | 11         |
| <b>C03</b>    | 21           | 21          | 8          | <b>U02</b>    |              | 12          | 5          | <b>P04</b>    | 37           | 15          | 0          |
| <b>Other</b>  | 378          | 165         | 67         | <b>Z02</b>    |              | 13          | 8          | <b>Å02</b>    | 33           | 27          | 14         |
|               |              |             |            | <b>Å02</b>    |              | 11          | 10         | <b>D03</b>    | 31           | 11          | 0          |
| <b>Sum</b>    | <b>2267</b>  | <b>1084</b> | <b>477</b> | <b>Other</b>  | 806          | 218         | 69         | <b>M03</b>    | 30           | 7           | 0          |
|               |              |             |            | <b>Sum</b>    | <b>2758</b>  | <b>1243</b> | <b>566</b> | <b>Å04</b>    | 30           | 19          | 14         |
|               |              |             |            |               |              |             |            | <b>R01</b>    | 29           | 4           | 0          |
|               |              |             |            |               |              |             |            | <b>Y06</b>    | 29           | 0           | 0          |
|               |              |             |            |               |              |             |            | <b>M12</b>    | 26           | 15          | 7          |
|               |              |             |            |               |              |             |            | <b>W04</b>    | 26           | 8           | 0          |
|               |              |             |            |               |              |             |            | <b>K08</b>    | 25           | 13          | 9          |
|               |              |             |            |               |              |             |            | <b>W01</b>    | 24           | 9           | 0          |
|               |              |             |            |               |              |             |            | <b>B03</b>    | 20           | 4           | 0          |
|               |              |             |            |               |              |             |            | <b>B05</b>    | 19           | 1           | 0          |
|               |              |             |            |               |              |             |            | <b>Z02</b>    | 19           | 10          | 10         |
|               |              |             |            |               |              |             |            | <b>Å12</b>    | 19           | 4           | 0          |
|               |              |             |            |               |              |             |            | <b>D08</b>    | 18           | 10          | 8          |

|            |    |    |   |
|------------|----|----|---|
| <b>F01</b> | 17 | 10 | 0 |
| <b>Y05</b> | 16 | 3  | 0 |
| <b>O66</b> | 15 | 6  | 0 |

|              |    |     |    |
|--------------|----|-----|----|
| <b>E08</b>   | 13 | 6   | 0  |
| <b>F02</b>   | 13 | 12  | 3  |
| <b>M28</b>   | 13 | 7   | 0  |
| <b>Å06</b>   | 11 | 2   | 0  |
| <b>E09</b>   | 9  | 2   | 0  |
| <b>I05</b>   | 9  | 0   | 0  |
| <b>Y08</b>   | 9  | 1   | 0  |
| <b>D14</b>   | 8  | 0   | 0  |
| <b>Z05</b>   | 8  | 0   | 0  |
| <b>G03</b>   | 7  | 5   | 0  |
| <b>E06</b>   | 6  | 0   | 0  |
| <b>E17</b>   | 6  | 4   | 0  |
| <b>D06</b>   | 5  | 0   | 0  |
| <b>I01</b>   | 5  | 0   | 0  |
| <b>Å11</b>   | 5  | 3   | 0  |
| <b>F04</b>   | 4  | 2   | 0  |
| <b>F10</b>   | 4  | 0   | 0  |
| <b>E11</b>   | 3  | 0   | 0  |
| <b>E25</b>   | 3  | 2   | 0  |
| <b>O46</b>   | 3  | 3   | 0  |
| <b>E22</b>   | 2  | 1   | 0  |
| <b>O01</b>   | 2  | 0   | 0  |
| <b>B10</b>   | 1  | 0   | 0  |
| <b>F07</b>   | 1  | 0   | 0  |
| <b>F08</b>   | 1  | 0   | 0  |
| <b>K09</b>   | 1  | 0   | 0  |
| <b>O67</b>   | 1  | 0   | 0  |
| <b>W13</b>   | 1  | 0   | 0  |
| <b>Y07</b>   | 1  | 0   | 0  |
| <b>Y10</b>   | 1  | 0   | 0  |
| <b>Y11</b>   | 1  | 0   | 0  |
| <b>I01</b>   | 0  | 0   | 0  |
| <b>M37</b>   | 0  | 0   | 0  |
| <b>M57</b>   | 0  | 0   | 0  |
| <b>O27</b>   | 0  | 0   | 0  |
| <b>O31</b>   | 0  | 0   | 0  |
| <b>O35</b>   | 0  | 0   | 0  |
| <b>O36</b>   | 0  | 0   | 0  |
| <b>O37</b>   | 0  | 0   | 0  |
| <b>O50</b>   | 0  | 0   | 0  |
| <b>O72</b>   | 0  | 0   | 0  |
| <b>Other</b> |    | 128 | 41 |

**Sum 2699 1098 548**

**2015**

**2016**

| <b>Clinic</b> | <b>Treat</b> | <b>F-up</b> | <b>Rem</b> | <b>Clinic</b> | <b>Treat</b> | <b>F-up</b> | <b>Rem</b> |
|---------------|--------------|-------------|------------|---------------|--------------|-------------|------------|
| A01           | 734          | 505         | 182        | A01           | 715          | 298         | 117        |
| A04           | 175          | 113         | 33         | A04           | 178          | 95          | 24         |
| O09           | 109          | 13          | 0          | T01           | 98           | 20          | 0          |
| T01           | 106          | 36          | 0          | O09           | 85           | 40          | 0          |
| B01           | 95           | 79          | 32         | X02           | 82           | 49          | 0          |
| M10           | 95           | 42          | 15         | B01           | 81           | 43          | 28         |
| H01           | 93           | 51          | 4          | O27           | 80           | 52          | 7          |
| X02           | 83           | 7           | 0          | H01           | 77           | 23          | 6          |
| S02           | 73           | 37          | 0          | M10           | 75           | 17          | 6          |
| U02           | 73           | 14          | 0          | E12           | 67           | 35          | 7          |
| N07           | 71           | 20          | 0          | C03           | 64           | 30          | 20         |
| E12           | 59           | 49          | 20         | N07           | 64           | 1           | 0          |
| N02           | 47           | 41          | 6          | U02           | 63           | 0           | 0          |
| N05           | 45           | 5           | 0          | C04           | 49           | 0           | 0          |
| M52           | 40           | 7           | 3          | O07           | 49           | 28          | 5          |
| C04           | 36           | 0           | 0          | W11           | 44           | 2           | 0          |
| O07           | 35           | 31          | 3          | N02           | 40           | 13          | 0          |
| M03           | 34           | 5           | 0          | M52           | 36           | 34          | 0          |
| Å04           | 34           | 14          | 7          | N05           | 35           | 26          | 0          |
| D03           | 31           | 18          | 0          | O03           | 35           | 24          | 8          |
| M12           | 31           | 9           | 0          | S02           | 32           | 7           | 0          |
| O03           | 29           | 21          | 10         | W01           | 31           | 29          | 11         |
| C03           | 26           | 13          | 11         | Y06           | 31           | 5           | 0          |
| Z02           | 26           | 13          | 9          | Å04           | 30           | 12          | 10         |
| M57           | 25           | 0           | 0          | M03           | 26           | 1           | 0          |
| K08           | 23           | 16          | 0          | B03           | 23           | 1           | 0          |
| B03           | 22           | 14          | 0          | D03           | 23           | 15          | 0          |
| Å02           | 22           | 11          | 0          | K08           | 23           | 13          | 0          |
| E08           | 18           | 10          | 0          | L01           | 21           | 0           | 0          |
| O27           | 17           | 17          | 7          | M37           | 21           | 1           | 0          |
| P04           | 17           | 0           | 0          | Z02           | 21           | 6           | 0          |
| W01           | 17           | 17          | 5          | E17           | 20           | 12          | 0          |
| Y06           | 15           | 7           | 0          | Å12           | 20           | 1           | 0          |
| D08           | 14           | 2           | 0          | M28           | 19           | 7           | 0          |
| G03           | 14           | 6           | 0          | R01           | 19           | 5           | 0          |
| I05           | 13           | 0           | 0          | Å02           | 19           | 5           | 0          |
| O66           | 13           | 13          | 0          | W04           | 17           | 6           | 0          |
| R01           | 13           | 6           | 0          | O66           | 15           | 15          | 5          |
| Y05           | 13           | 2           | 0          | Y05           | 15           | 2           | 0          |
| D14           | 12           | 0           | 0          | F01           | 13           | 0           | 0          |
| W11           | 12           | 0           | 0          | E09           | 11           | 0           | 0          |
| E17           | 10           | 6           | 0          | M12           | 10           | 3           | 0          |
| W04           | 10           | 4           | 0          | O72           | 9            | 1           | 0          |
| Å06           | 10           | 8           | 0          | B05           | 7            | 3           | 0          |
| Å12           | 10           | 2           | 0          | E08           | 7            | 3           | 0          |
| E09           | 9            | 1           | 0          | I05           | 7            | 0           | 0          |
| B05           | 7            | 2           | 0          | G03           | 6            | 2           | 0          |
| L01           | 7            | 0           | 0          | Z05           | 6            | 0           | 0          |

|              |             |             |            |              |             |            |            |
|--------------|-------------|-------------|------------|--------------|-------------|------------|------------|
| <b>M28</b>   | 7           | 1           | 0          | <b>Å06</b>   | 6           | 4          | 0          |
| <b>Y08</b>   | 6           | 1           | 0          | <b>D08</b>   | 5           | 4          | 0          |
| <b>E06</b>   | 5           | 0           | 0          | <b>E06</b>   | 5           | 0          | 0          |
| <b>F02</b>   | 5           | 0           | 0          | <b>I02</b>   | 5           | 2          | 0          |
| <b>Å11</b>   | 5           | 0           | 0          | <b>M57</b>   | 5           | 0          | 0          |
| <b>I02</b>   | 4           | 1           | 0          | <b>Y08</b>   | 3           | 1          | 0          |
| <b>M37</b>   | 4           | 4           | 0          | <b>F04</b>   | 2           | 2          | 0          |
| <b>O72</b>   | 4           | 1           | 0          | <b>O71</b>   | 2           | 0          | 0          |
| <b>D06</b>   | 2           | 0           | 0          | <b>E22</b>   | 1           | 0          | 0          |
| <b>F01</b>   | 2           | 2           | 0          | <b>Y11</b>   | 1           | 0          | 0          |
| <b>F10</b>   | 2           | 0           | 0          | <b>Å11</b>   | 1           | 0          | 0          |
| <b>Y11</b>   | 2           | 0           | 0          | <b>B10</b>   | 0           | 0          | 0          |
| <b>B10</b>   | 1           | 0           | 0          | <b>D06</b>   | 0           | 0          | 0          |
| <b>E25</b>   | 1           | 0           | 0          | <b>D14</b>   | 0           | 0          | 0          |
| <b>F04</b>   | 1           | 0           | 0          | <b>E25</b>   | 0           | 0          | 0          |
| <b>Z05</b>   | 1           | 0           | 0          | <b>F02</b>   | 0           | 0          | 0          |
| <b>E11</b>   | 0           | 0           | 0          | <b>F10</b>   | 0           | 0          | 0          |
| <b>E22</b>   | 0           | 0           | 0          | <b>P04</b>   | 0           | 0          | 0          |
| <b>F07</b>   | 0           | 0           | 0          | <b>E11</b>   | 0           | 0          | 0          |
| <b>F08</b>   | 0           | 0           | 0          | <b>F07</b>   | 0           | 0          | 0          |
| <b>K09</b>   | 0           | 0           | 0          | <b>F08</b>   | 0           | 0          | 0          |
| <b>O01</b>   | 0           | 0           | 0          | <b>K09</b>   | 0           | 0          | 0          |
| <b>O46</b>   | 0           | 0           | 0          | <b>O01</b>   | 0           | 0          | 0          |
| <b>O67</b>   | 0           | 0           | 0          | <b>O46</b>   | 0           | 0          | 0          |
| <b>O71</b>   | 0           | 0           | 0          | <b>O67</b>   | 0           | 0          | 0          |
| <b>W13</b>   | 0           | 0           | 0          | <b>W13</b>   | 0           | 0          | 0          |
| <b>Y07</b>   | 0           | 0           | 0          | <b>Y07</b>   | 0           | 0          | 0          |
| <b>Y10</b>   | 0           | 0           | 0          | <b>Y10</b>   | 0           | 0          | 0          |
| <b>Other</b> |             | 147         | 76         | <b>Other</b> |             |            | 104        |
| <b>Sum</b>   | <b>2575</b> | <b>1444</b> | <b>423</b> | <b>Sum</b>   | <b>2555</b> | <b>998</b> | <b>358</b> |
